# Supplementary material for: Solvent-driven C(sp3)–H thiocarbonylation of benzylamine derivatives under catalyst-free conditions
Source: Royal Society of Chemistry journal article supplement (doi:10.1039/d0gc03832f), 2021-01-01
Supplement: d0gc03832f1.pdf [file d0gc03832f1.pdf]

## Supporting information

### Solvent-Driven C(*sp*<sup>3</sup>)-H Thiocarbonylation of Benzylamine Derivatives under Catalyst-Free Conditions

Jingwei Zhou,<sup>\*,a</sup> Songping Wang,<sup>a</sup> Yaoming Lu,<sup>b</sup> Lamei Li,<sup>a</sup> Wentao Duan,<sup>a</sup> Qi Wang,<sup>a</sup> Hong Wang,<sup>\*,a</sup> and Wentao Wei<sup>\*,a</sup>

<sup>a</sup> Institute of Clinical Pharmacology, Science and Technology Innovation Center, Guangzhou University of Chinese Medicine, Guangzhou 510405, Guangdong, China

<sup>b</sup> The Second Affiliated Hospital of Chinese Medicine, Guangzhou University of Chinese Medicine, Guangzhou 510405, Guangdong, China

## Table of Contents

|                                                        |            |
|--------------------------------------------------------|------------|
| <b>1. General Information</b>                          | <b>S1</b>  |
| <b>2. General Procedures</b>                           | <b>S2</b>  |
| <b>3. Computational Method</b>                         | <b>S4</b>  |
| <b>4. Figures S1-S2</b>                                | <b>S4</b>  |
| <b>5. Characterization Data</b>                        | <b>S5</b>  |
| <b>6. References</b>                                   | <b>S18</b> |
| <b>7. <sup>1</sup>H and <sup>13</sup>C NMR Spectra</b> | <b>S21</b> |
| <b>8. Molecular Coordinates and Free Energies</b>      | <b>S48</b> |

### 1. General Information

<sup>1</sup>H NMR and <sup>13</sup>C NMR spectra were recorded on Bruker AVANCE 400 and 500 spectrometer. Chemical shifts of protons were reported in parts per million downfield from tetramethylsilane and were referenced to residual protium in the NMR solvent (CDCl<sub>3</sub>: δ 7.26), (DMSO-d<sub>6</sub>: δ 2.50). Chemical shifts of carbon were referenced to the carbon resonances of the solvent (CDCl<sub>3</sub>: δ 77.0), (DMSO-d<sub>6</sub>: δ 39.5). Peaks were labeled as singlet (s), doublet (d), triplet (t), quartet (q) and multiplet (m). Melting points were measured on a WRS-2A melting point apparatus and were uncorrected. All products were further characterized by HRMS (high resolution mass spectra). Copies of their <sup>1</sup>H NMR and <sup>13</sup>C NMR spectra were provided. Substrates of **1c-1e** were purchased from *J&K* and used without further purification. DMF was purchased from *J&K* in 99.8% and DMPU was purchased from *J&K* in 98%. Both the grades of DMF and DMPU were analysis pure.

## 2. General Procedures

### (I) Typical procedure for the preparation of substrates **1a**, **1b**, **1aa–1an**, **1ap**, **1aq** and **1as–1ay**.

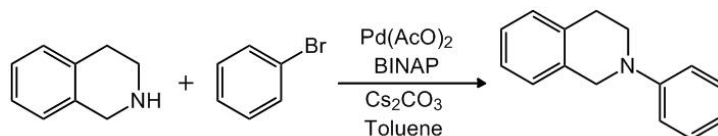

The compound was synthesized according to a known procedure.<sup>1-3</sup> To a solution of cesium carbonate (1.95 g, 6.0 mmol) in toluene (15 mL), bromobenzene (471 mg, 3.0 mmol), Pd(AcO)<sub>2</sub> (37 mg, 0.15 mmol), BINAP (186 mg, 0.3 mmol) and 1,2,3,4-tetrahydroisoquinoline (598 mg, 4.5 mmol) were added in sequence. The reaction mixture was stirred at 100 °C for 10 h. After completion of the reaction as shown by TLC, the crude mixture was filtered with celatom. And the filter liquor was heated through vacuum distillation to remove toluene. Then, the crude product was purified by flash chromatography to give a yellow oil **1a** (439 mg, yield: 70%).

### (II) Typical procedure for the preparation of substrates **1ao**.

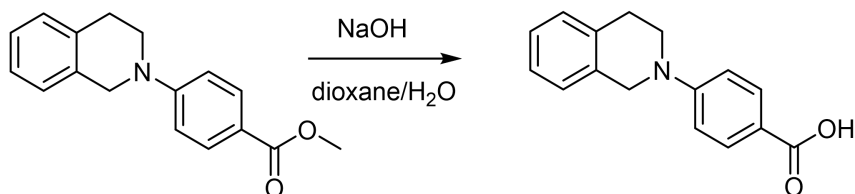

To a solution of NaOH (160 mg, 4.0 mmol) in dioxane (5 mL), H<sub>2</sub>O (5 mL), the substrate methyl 4-(3,4-dihydroisoquinolin-2(1H)-yl)benzoate bromobenzene **1am** (534 mg, 2.0 mmol) was added. The reaction mixture was stirred at 90 °C for 2 h. Then, the mixture was acidated with 2 M HCl to pH 3-4. The mixture was extracted with ethyl acetate (5 mL × 3), the combined organic layer was washed with saturated NaCl (5 mL), dried with anhydrous sodium sulfate and concentrated in vacuum, giving a yellow solid **1ao** (455 mg, yield: 90%).

### (III) Typical procedure for the preparation of substrates **1ar**.

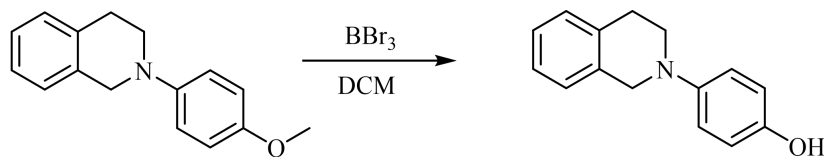

To a solution of the substrate 2-(4-methoxyphenyl)-1,2,3,4-tetrahydroisoquinoline **1ae** (480 mg, 2.0 mmol) in DCM (5 mL), BBr<sub>3</sub> 1.0 M (4 mL, 4 mmol) was added dropwise. The mixture was stirred at -78 °C for 2 h. Then, continue to react at room temperature for 10 h. After that, the mixture was quenched with saturated NH<sub>4</sub>Cl at 0 °C. The mixture was filtered with diatomite, then DCM 10 mL was added for extraction. Then, the combined organic layer was dried with anhydrous sodium sulfate. The crude production was purified by flash chromatography to give a yellow oil **1ar** (90 mg, yield: 20%).

#### (IV) Typical procedure for catalyst-free C(sp<sup>3</sup>)-H thiocarbonylation.

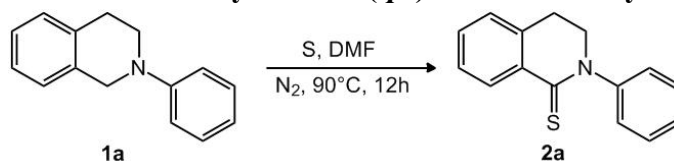

2-phenyl-1, 2, 3, 4-tetrahydroisoquinoline **1a** (62.7 mg, 0.3 mmol) and S (19.2 mg, 0.6 mmol) was added to 10 mL reaction tube containing 2 mL DMF, and the reaction mixture was stirred at 90°C in nitrogen atmosphere condition for 12 h. Then, DMF was recycled through vacuum distillation at 90°C in 60 mbar. The rest crude product was purified by flash chromatography to give a yellow solid **2a** (50.2 mg, yield: 70%).

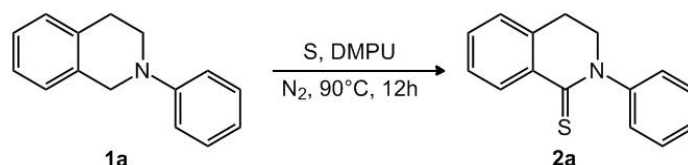

2-phenyl-1, 2, 3, 4-tetrahydroisoquinoline **1a** (62.7 mg, 0.3 mmol) and S (19.2 mg, 0.6 mmol) was added to 10 mL reaction tube containing 2 mL DMPU, and the reaction mixture was stirred at 90°C in nitrogen atmosphere condition for 12 h. Then, most of DMPU was removed through vacuum distillation at 145°C in 60 mbar and the remaining small amount of DMPU was removed by the column chromatography silica gel (200–300 mesh). The rest reaction mixture was further dried on the rotary evaporator and the obtained crude product was purified by flash chromatography to give a yellow solid **2a** (54.5 mg, yield: 76%).

#### (V) Gram scale reaction

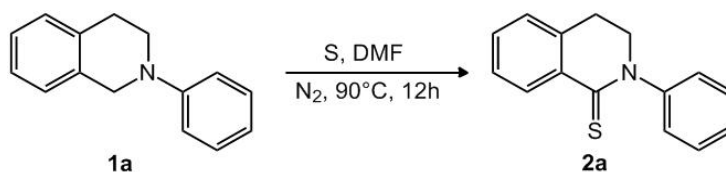

2-phenyl-1, 2, 3, 4-tetrahydroisoquinoline **1a** (1045 mg, 5 mmol) and S (320 mg, 10 mmol) were added to 50 mL reaction tube containing 10 mL DMF, the reaction mixture was stirred at 90°C in nitrogen atmosphere condition for 12 h. Then, about 8 mL DMF was recovered through vacuum distillation at 90°C in 60 mbar (the recovery rate of DMF is about 80%). The rest crude product was further purified by flash chromatography to give a yellow solid **2a** (776 mg, yield: 65%).

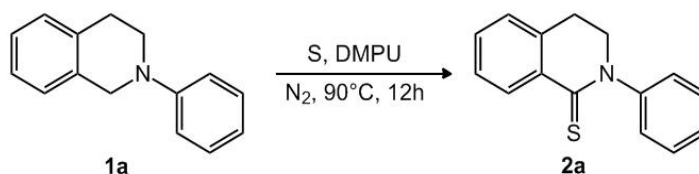

2-phenyl-1, 2, 3, 4-tetrahydroisoquinoline **1a** (1045 mg, 5 mmol) and S (320 mg, 10 mmol) were added to 50 mL reaction tube containing 10 mL DMPU, the reaction

mixture was stirred at 90°C in nitrogen atmosphere condition for 12 h. Then, about 7.5 mL DMPU was recovered through vacuum distillation at 145°C in 60 mbar (the recovery of DMPU is about 75%). The rest crude product was further purified by flash chromatography to give a yellow solid **2a** (848 mg, yield: 71%).

### 3. Computational Method

All the geometry optimization and vibration frequency calculation were carried out in Gaussian09 package.<sup>4</sup> And the density-functional theory (DFT) method<sup>5</sup> were employed for these computations. For geometry optimization, all the structures including the ground states (**1**, **A**, **B**, **C** and **2**) and transition states (**TS1**, **TS2** and **TS3**) were performed at the B3LYP method<sup>6</sup> with 6-31+G(d, p) basis set<sup>7</sup>. For vibration frequency calculation, same computational method and basis set were carried out to make sure that the optimized structures were true energy minima, and obtain the absolute free energies of the optimized molecules. The reaction coordinate driving method (flexible scan) as well as the following restricted geometry optimization and the corresponding vibration frequency were employed to calculate the free energy profiles from **B** state to **C** state for the selected molecules (**1a–1e**) also at the same computational method and basis set. The reaction coordinate from **B** state to **C** state was the attack distance between the  $S_3^{\bullet-}$  molecule and the B state. All the above calculations considered the solvation effect (DMPU, DMF, DMA, Acetone and  $CH_3CN$ ) provided by the PCM solvent continuum models.<sup>8</sup>

### 4. Figures S1-S2

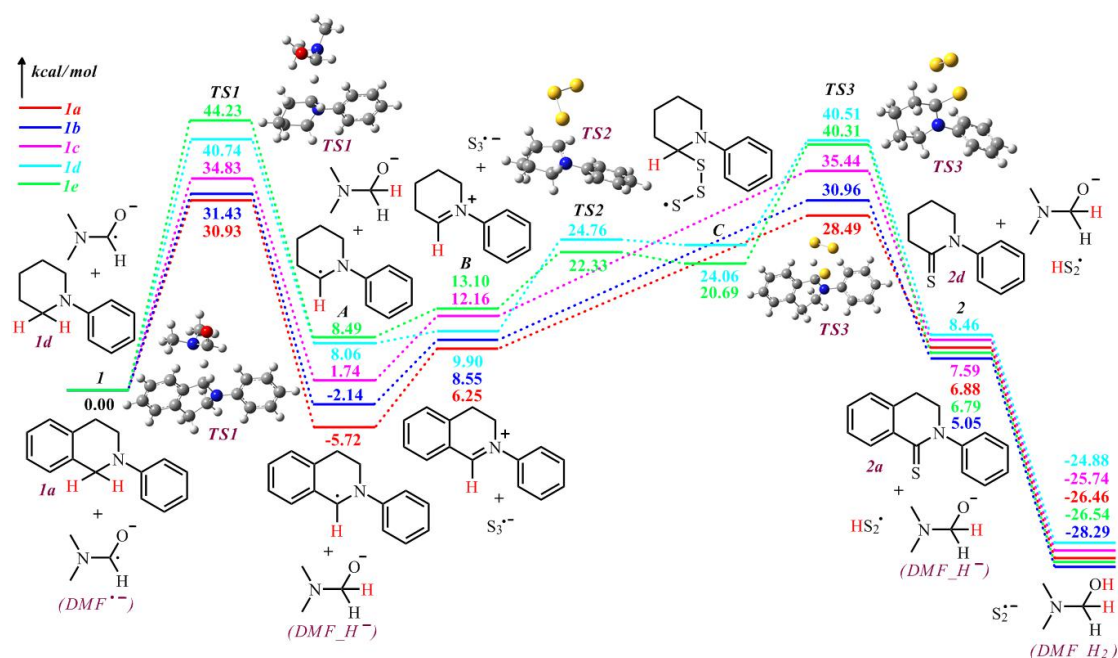

**Figure S1.** Reaction profiles of **1a–1e** in DMF solvent based on the reaction mechanism in Figure 1 (mechanistic studies).

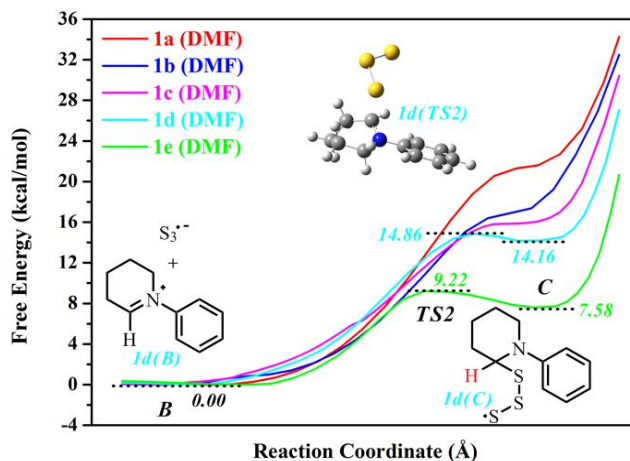

**Figure S2.** Influence of C state on our C( $sp^3$ )-H thiocarbonylation (mechanistic studies).

## 5. Characterization Data

### 2-phenyl-1, 2, 3, 4-tetrahydroisoquinoline (1a)

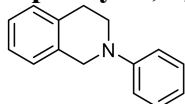

Yellow oil.  $^1\text{H NMR}$  (400 MHz,  $\text{CDCl}_3$ )  $\delta$  7.31-7.25 (m, 2H), 7.20-7.13 (m, 4H), 6.98 (d,  $J = 8.0$  Hz, 2H), 6.82 (t,  $J = 7.2$  Hz, 1H), 4.41 (s, 2H), 3.56 (t,  $J = 5.8$  Hz, 2H), 2.99 (t,  $J = 5.8$  Hz, 2H).  $^{13}\text{C NMR}$  (100 MHz,  $\text{CDCl}_3$ )  $\delta$  150.58, 134.90, 134.49, 129.22, 128.54, 126.56, 126.35, 126.04, 118.68, 115.16, 50.76, 46.54, 29.14. **HRMS** (ESI) calculated for  $\text{C}_{15}\text{H}_{16}\text{N}$  ( $\text{M}+\text{H}$ ) $^+$ : 210.1277, found: 210.1273. Same compound was also reported in previous literature<sup>9</sup> and our characterization data was highly consistent with its data.

### 2-phenylisoindoline (1b)

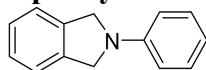

White solid. M. p. 171-172 °C.  $^1\text{H NMR}$  (400 MHz,  $\text{CDCl}_3$ )  $\delta$  7.49-7.30 (m, 6H), 6.82 (t,  $J = 7.2$  Hz, 1H), 6.75 (d,  $J = 8.0$  Hz, 2H), 4.71 (s, 4H).  $^{13}\text{C NMR}$  (125 MHz,  $\text{CDCl}_3$ )  $\delta$  147.20, 137.99, 129.44, 127.21, 122.66, 116.24, 111.65, 53.81. **HRMS** (ESI) calculated for  $\text{C}_{14}\text{H}_{14}\text{N}$  ( $\text{M}+\text{H}$ ) $^+$ : 196.1121, found: 196.1123. Same compound was also reported in previous literature<sup>10</sup> and our characterization data was highly consistent with its data.

### 2-(*o*-tolyl)-1, 2, 3, 4-tetrahydroisoquinoline (1aa)

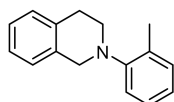

Yellow oil.  $^1\text{H NMR}$  (400 MHz,  $\text{CDCl}_3$ )  $\delta$  7.31-7.21 (m, 5H), 7.20-7.13 (m, 2H), 7.08 (t,  $J = 7.2$  Hz, 1H), 4.20 (s, 2H), 3.29 (t,  $J = 5.8$  Hz, 2H), 3.08 (t,  $J = 5.6$  Hz, 2H), 2.42

(s, 3H).  $^{13}\text{C}$  NMR (100 MHz,  $\text{CDCl}_3$ )  $\delta$  151.58, 135.53, 134.66, 132.95, 131.20, 128.99, 126.64, 126.46, 126.24, 125.74, 123.27, 119.34, 54.26, 50.36, 29.74, 18.11. HRMS (ESI) calculated for  $\text{C}_{16}\text{H}_{18}\text{N}$  ( $\text{M}+\text{H}$ ) $^+$ : 224.1434, found: 224.1433. Same compound was also reported in previous literature<sup>10</sup> and our characterization data was highly consistent with its data.

#### 2-(*m*-tolyl)-1, 2, 3, 4-tetrahydroisoquinoline (1ab)

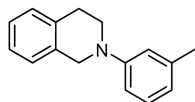

Yellow oil.  $^1\text{H}$  NMR (400 MHz,  $\text{CDCl}_3$ )  $\delta$  7.22-7.11 (m, 5H), 7.08 (d,  $J = 8.8$  Hz, 2H), 6.99 (t,  $J = 7.2$  Hz, 1H), 4.10 (s, 2H), 3.19 (t,  $J = 5.6$  Hz, 2H), 2.99 (t,  $J = 5.4$  Hz, 2H), 2.34 (s, 3H).  $^{13}\text{C}$  NMR (100 MHz,  $\text{CDCl}_3$ )  $\delta$  151.63, 135.57, 134.69, 132.99, 131.24, 129.02, 126.68, 126.49, 126.28, 125.78, 123.31, 119.39, 54.31, 50.40, 29.78, 18.15. HRMS (ESI) calculated for  $\text{C}_{16}\text{H}_{18}\text{N}$  ( $\text{M}+\text{H}$ ) $^+$ : 224.1434, found: 224.1430. Same compound was also reported in previous literature<sup>9</sup> and our characterization data was highly consistent with its data.

#### 2-(*p*-tolyl)-1, 2, 3, 4-tetrahydroisoquinoline (1ac)

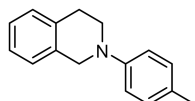

Yellow oil.  $^1\text{H}$  NMR (400 MHz,  $\text{CDCl}_3$ )  $\delta$  7.48-7.45 (m, 2H), 7.44-7.36 (m, 4H), 7.22 (t,  $J = 6.6$  Hz, 2H), 4.63 (s, 2H), 3.76 (t,  $J = 5.8$  Hz, 2H), 3.24 (t,  $J = 5.4$  Hz, 2H), 2.60 (s, 3H).  $^{13}\text{C}$  NMR (100 MHz,  $\text{CDCl}_3$ )  $\delta$  148.98, 135.06, 134.90, 130.06, 128.91, 128.51, 126.88, 126.57, 126.26, 116.13, 51.72, 47.52, 29.47, 20.80. HRMS (ESI) calculated for  $\text{C}_{16}\text{H}_{18}\text{N}$  ( $\text{M}+\text{H}$ ) $^+$ : 224.1434, found: 224.1432. Same compound was also reported in previous literature<sup>9</sup> and our characterization data was highly consistent with its data.

#### 2-(3, 5-dimethylphenyl)-1, 2, 3, 4-tetrahydroisoquinoline (1ad)

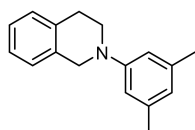

White solid. M. p. 47-48 °C.  $^1\text{H}$  NMR (400 MHz,  $\text{CDCl}_3$ )  $\delta$  7.15 (dd,  $J = 6.4, 4.0$  Hz, 4H), 6.62 (s, 2H), 6.50 (s, 1H), 4.37 (s, 2H), 3.52 (t,  $J = 6.0$  Hz, 2H), 2.96 (t,  $J = 5.8$  Hz, 2H), 2.30 (s, 6H).  $^{13}\text{C}$  NMR (100 MHz,  $\text{CDCl}_3$ )  $\delta$  150.85, 138.77, 134.99, 134.70, 128.56, 126.59, 126.30, 126.02, 120.78, 113.22, 51.00, 46.68, 29.36, 21.81. HRMS (ESI) calculated for  $\text{C}_{17}\text{H}_{20}\text{N}$  ( $\text{M}+\text{H}$ ) $^+$ : 238.1590, found: 238.1588. Same compound was also reported in previous literature<sup>9</sup> and our characterization data was highly consistent with its data.

#### 2-(4-methoxyphenyl)-1, 2, 3, 4-tetrahydroisoquinoline (1ae)

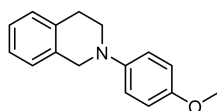

White solid. M. p. 94-95 °C.  $^1\text{H NMR}$  (400 MHz,  $\text{CDCl}_3$ )  $\delta$  7.16-7.12 (m, 4H), 6.98 (d,  $J = 8.8$  Hz, 2H), 6.86 (d,  $J = 9.2$  Hz, 2H), 4.29 (s, 2H), 3.77 (s, 3H), 3.44 (t,  $J = 6.0$  Hz, 2H), 2.98 (t,  $J = 5.6$  Hz, 2H).  $^{13}\text{C NMR}$  (100 MHz,  $\text{CDCl}_3$ )  $\delta$  158.09, 150.61, 136.09, 129.22, 127.54, 126.68, 118.65, 115.17, 113.21, 112.37, 55.32, 50.22, 46.51, 29.43. **HRMS** (ESI) calculated for  $\text{C}_{16}\text{H}_{18}\text{NO}$  ( $\text{M}+\text{H}$ ) $^+$ : 240.1383, found: 240.1380. Same compound was also reported in previous literature<sup>11</sup> and our characterization data was highly consistent with its data.

### 2-(3-chlorophenyl)-1, 2, 3, 4-tetrahydroisoquinoline (1af)

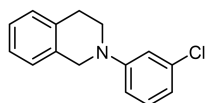

Yellow oil.  $^1\text{H NMR}$  (400 MHz,  $\text{CDCl}_3$ )  $\delta$  7.24-7.01 (m, 5H), 6.88 (t,  $J = 2.2$  Hz, 1H), 6.82-6.66 (m, 2H), 4.34 (s, 2H), 3.48 (t,  $J = 5.8$  Hz, 2H), 2.92 (t,  $J = 5.8$  Hz, 2H).  $^{13}\text{C NMR}$  (125 MHz,  $\text{CDCl}_3$ )  $\delta$  151.46, 135.16, 134.88, 134.07, 130.21, 128.52, 126.63, 126.30, 118.04, 114.43, 112.67, 50.11, 45.95, 29.12. **HRMS** (ESI) calculated for  $\text{C}_{15}\text{H}_{15}\text{NCl}$  ( $\text{M}+\text{H}$ ) $^+$ : 244.0888, found: 244.0883. Same compound was also reported in previous literature<sup>9</sup> and our characterization data was highly consistent with its data.

### 2-(4-chlorophenyl)-1, 2, 3, 4-tetrahydroisoquinoline (1ag)

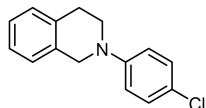

White solid. M. p. 71-72 °C.  $^1\text{H NMR}$  (400 MHz,  $\text{CDCl}_3$ )  $\delta$  7.28-7.06 (m, 6H), 6.87 (d,  $J = 9.0$  Hz, 2H), 4.36 (s, 2H), 3.51 (t,  $J = 5.8$  Hz, 2H), 2.97 (t,  $J = 5.8$  Hz, 2H).  $^{13}\text{C NMR}$  (100 MHz,  $\text{CDCl}_3$ )  $\delta$  149.09, 134.71, 134.10, 129.03, 128.55, 126.54, 126.52, 126.17, 123.35, 116.17, 50.66, 46.55, 28.97. **HRMS** (ESI) calculated for  $\text{C}_{15}\text{H}_{15}\text{NCl}$  ( $\text{M}+\text{H}$ ) $^+$ : 244.0888, found: 244.0883. Same compound was also reported in previous literature<sup>9</sup> and our characterization data was highly consistent with its data.

### 2-(3-bromophenyl)-1, 2, 3, 4-tetrahydroisoquinoline (1ah)

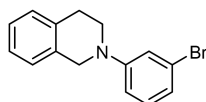

Yellow oil.  $^1\text{H NMR}$  (400 MHz,  $\text{CDCl}_3$ )  $\delta$  7.39 (dd,  $J = 8.0, 1.6$  Hz, 1H), 7.21-7.09 (m, 4H), 7.05 (t,  $J = 2.0$  Hz, 1H), 6.89 (d,  $J = 8.0$  Hz, 1H), 6.82 (dd,  $J = 8.8, 2.4$  Hz, 1H), 4.35 (s, 2H), 3.50 (t,  $J = 5.8$  Hz, 2H), 2.93 (t,  $J = 5.8$  Hz, 2H).  $^{13}\text{C NMR}$  (100 MHz,  $\text{CDCl}_3$ )  $\delta$  151.57, 134.83, 134.00, 130.45, 130.29, 128.48, 126.57, 126.27, 123.47, 120.94, 117.30, 113.09, 50.08, 45.93, 29.09. **HRMS** (ESI) calculated for  $\text{C}_{15}\text{H}_{15}\text{NBr}$  ( $\text{M}+\text{H}$ ) $^+$ : 288.0383, found: 288.0380. Same compound was also reported



in previous literature<sup>12</sup> and our characterization data was highly consistent with its data.

### 2-(4-bromophenyl)-1, 2, 3, 4-tetrahydroisoquinoline (1ai)

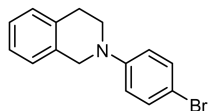

Yellow solid. M. p. 93-94 °C. <sup>1</sup>H NMR (400 MHz, CDCl<sub>3</sub>) δ 7.34 (d, *J* = 8.8 Hz, 2H), 7.19-7.15 (m, 4H), 6.82 (d, *J* = 8.8 Hz, 2H), 4.37 (s, 2H), 3.52 (t, *J* = 5.8 Hz, 2H), 2.97 (t, *J* = 5.8 Hz, 2H). <sup>13</sup>C NMR (100 MHz, CDCl<sub>3</sub>) δ 149.43, 134.72, 134.05, 131.92, 128.51, 126.53, 126.18, 116.48, 110.47, 50.45, 46.33, 28.95. HRMS (ESI) calculated for C<sub>15</sub>H<sub>15</sub>NBr (M+H)<sup>+</sup>: 288.0383, found: 288.0382. Same compound was also reported in previous literature<sup>9</sup> and our characterization data was highly consistent with its data.

### 4-(3, 4-dihydroisoquinolin-2(1*H*)-yl)benzonitrile (1aj)

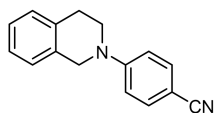

Yellow solid. M. p. 90-91 °C. <sup>1</sup>H NMR (400 MHz, CDCl<sub>3</sub>) δ 7.59-7.46 (m, 2H), 7.34-7.11 (m, 4H), 6.95-6.74 (m, 2H), 4.52 (s, 2H), 3.66 (t, *J* = 5.8 Hz, 2H), 3.02 (t, *J* = 5.8 Hz, 2H). <sup>13</sup>C NMR (125 MHz, CDCl<sub>3</sub>) δ 152.21, 134.93, 133.58, 133.42, 128.21, 126.97, 126.56, 126.50, 120.45, 112.68, 98.65, 48.79, 44.62, 28.96. HRMS (ESI) calculated for C<sub>16</sub>H<sub>15</sub>N<sub>2</sub> (M+H)<sup>+</sup>: 235.1230, found: 235.1227. Same compound was also reported in previous literature<sup>9</sup> and our characterization data was highly consistent with its data.

### 1-(4-(3,4-dihydroisoquinolin-2(1*H*)-yl)phenyl)ethan-1-one (1ak)

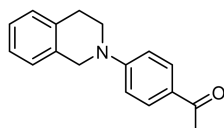

White solid. M. p. 105-106 °C. <sup>1</sup>H NMR (400 MHz, CDCl<sub>3</sub>) δ 7.85 (d, *J* = 8.8 Hz, 2H), 7.19-6.98 (m, 4H), 6.75 (d, *J* = 8.8 Hz, 2H), 4.38 (s, 2H), 3.76 (s, 3H), 3.52 (t, *J* = 5.8 Hz, 2H), 2.86 (t, *J* = 5.8 Hz, 2H). <sup>13</sup>C NMR (100 MHz, CDCl<sub>3</sub>) δ 167.35, 153.03, 135.06, 133.83, 131.39, 128.25, 126.76, 126.54, 126.41, 118.29, 112.11, 51.61, 49.04, 44.81, 29.08. HRMS (ESI) calculated for C<sub>17</sub>H<sub>18</sub>NO (M+H)<sup>+</sup>: 252.1383, found: 252.1380. Same compound was also reported in previous literature<sup>13</sup> and our characterization data was highly consistent with its data.

### (4-(3, 4-dihydroisoquinolin-2(1*H*)-yl)phenyl)(phenyl)methanone (1al)

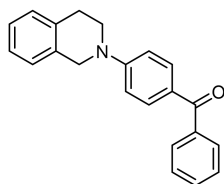

White solid. M. p. 84-85 °C.  $^1\text{H NMR}$  (400 MHz,  $\text{CDCl}_3$ )  $\delta$  7.82 (d,  $J = 8.8$  Hz, 2H), 7.73-7.71 (m, 2H), 7.51 (t,  $J = 7.4$  Hz, 1H), 7.47-7.41 (m, 2H), 7.23-7.11 (m, 4H), 6.87 (d,  $J = 9.0$  Hz, 2H), 4.52 (s, 2H), 3.65 (t,  $J = 5.8$  Hz, 2H), 2.97 (t,  $J = 5.8$  Hz, 2H).  $^{13}\text{C NMR}$  (100 MHz,  $\text{CDCl}_3$ )  $\delta$  195.17, 152.95, 139.14, 135.07, 133.72, 132.81, 131.34, 129.56, 128.25, 128.11, 126.86, 126.55, 126.49, 125.92, 111.85, 48.98, 44.75, 29.06. **HRMS** (ESI) calculated for  $\text{C}_{22}\text{H}_{20}\text{NO}$  ( $\text{M}+\text{H}$ ) $^+$ : 314.1540, found: 314.1537. Same compound was also reported in previous literature<sup>14</sup> and our characterization data was highly consistent with its data.

#### methyl 4-(3, 4-dihydroisoquinolin-2(*1H*)-yl)benzoate (1am)

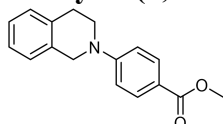

White solid. M. p. 100-101 °C.  $^1\text{H NMR}$  (400 MHz,  $\text{CDCl}_3$ )  $\delta$  7.85 (d,  $J = 8.8$  Hz, 2H), 7.20-6.97 (m, 4H), 6.75 (d,  $J = 8.8$  Hz, 2H), 4.38 (s, 2H), 3.76 (s, 3H), 3.52 (t,  $J = 5.8$  Hz, 2H), 2.86 (t,  $J = 5.6$  Hz, 2H).  $^{13}\text{C NMR}$  (100 MHz,  $\text{CDCl}_3$ )  $\delta$  167.35, 153.03, 135.06, 133.83, 131.39, 128.25, 126.76, 126.54, 126.41, 118.29, 112.11, 51.61, 49.04, 44.81, 29.08. **HRMS** (ESI) calculated for  $\text{C}_{17}\text{H}_{18}\text{NO}_2$  ( $\text{M}+\text{H}$ ) $^+$ : 268.1332, found: 268.1330.

#### 2-(4-(methylsulfonyl)phenyl)-1, 2, 3, 4-tetrahydroisoquinoline (1an)

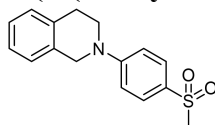

White solid. M. p. 142-143 °C.  $^1\text{H NMR}$  (400 MHz,  $\text{CDCl}_3$ )  $\delta$  7.71 (d,  $J = 9.2$  Hz, 2H), 7.19-7.09 (m, 4H), 6.85 (d,  $J = 9.2$  Hz, 2H), 4.45 (s, 2H), 3.59 (t,  $J = 6.0$  Hz, 2H), 2.94-2.91 (m, 5H).  $^{13}\text{C NMR}$  (100 MHz,  $\text{CDCl}_3$ )  $\delta$  153.13, 134.95, 133.44, 129.21, 128.20, 127.12, 126.98, 126.57, 126.52, 112.27, 48.93, 45.09, 44.76, 28.96. **HRMS** (ESI) calculated for  $\text{C}_{16}\text{H}_{18}\text{NO}_2\text{S}$  ( $\text{M}+\text{H}$ ) $^+$ : 288.1053, found: 288.1058. Same compound was also reported in previous literature<sup>15</sup> and our characterization data was highly consistent with its data.

#### 4-(3, 4-dihydroisoquinolin-2(*1H*)-yl)benzoic acid (1ao)

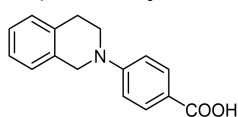

Yellow solid. M. p. 211-213 °C.  $^1\text{H NMR}$  (500 MHz,  $\text{CDCl}_3$ )  $\delta$  7.95 (d,  $J = 8.5$  Hz, 2H), 7.16-7.04 (m, 4H), 6.81 (d,  $J = 8.5$  Hz, 2H), 4.47 (s, 2H), 3.60 (t,  $J = 6.0$  Hz, 2H), 2.93 (t,  $J = 6.0$  Hz, 2H).  $^{13}\text{C NMR}$  (125 MHz,  $\text{CDCl}_3$ )  $\delta$  172.22, 153.52, 135.08, 133.75, 132.16, 128.21, 126.81, 126.53, 126.46, 117.16, 111.95, 48.96, 44.72, 29.08. **HRMS** (ESI) calculated for  $\text{C}_{16}\text{H}_{14}\text{NO}_2$  ( $\text{M}-\text{H}$ ) $^-$ : 252.1030, found: 252.1023. Same compound was also reported in previous literature<sup>13</sup> and our characterization data was highly consistent with its data.

#### 4-(3, 4-dihydroisoquinolin-2(*1H*)-yl)benzaldehyde (1ap)

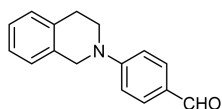

Yellow solid. M. p. 84-85 °C.  $^1\text{H NMR}$  (400 MHz,  $\text{CDCl}_3$ )  $\delta$  9.76 (s, 1H), 7.77 (d,  $J = 9.0$  Hz, 2H), 7.24-7.17 (m, 4H), 6.91 (d,  $J = 9.0$  Hz, 2H), 4.55 (s, 2H), 3.68 (t,  $J = 6.0$  Hz, 2H), 2.99 (t,  $J = 6.0$  Hz, 2H).  $^{13}\text{C NMR}$  (100 MHz,  $\text{CDCl}_3$ )  $\delta$  190.40, 153.99, 135.06, 133.51, 132.08, 128.16, 126.97, 126.57, 126.52, 126.07, 112.10, 48.82, 44.65, 29.05. **HRMS** (ESI) calculated for  $\text{C}_{16}\text{H}_{16}\text{NO}$  ( $\text{M}+\text{H}$ ) $^+$ : 238.1227, found: 238.1230.

#### 4-(3, 4-dihydroisoquinolin-2(1H)-yl)-N, N-dimethylbenzothioamide (1aq)

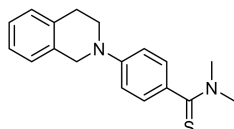

Yellow oil.  $^1\text{H NMR}$  (500 MHz,  $\text{CDCl}_3$ )  $\delta$  7.33 (d,  $J = 8.6$  Hz, 2H), 7.23-7.13 (m, 4H), 6.87 (d,  $J = 8.4$  Hz, 2H), 4.45 (s, 2H), 3.62-3.56 (m, 5H), 3.26 (s, 3H), 2.98 (t,  $J = 5.8$  Hz, 2H).  $^{13}\text{C NMR}$  (125 MHz,  $\text{CDCl}_3$ )  $\delta$  201.86, 150.67, 134.90, 134.05, 132.51, 128.42, 128.26, 126.56, 126.52, 126.22, 113.11, 49.85, 45.61, 44.54, 43.76, 28.96. **HRMS** (ESI) calculated for  $\text{C}_{18}\text{H}_{20}\text{N}_2\text{SNa}$  ( $\text{M}+\text{Na}$ ) $^+$ : 319.0239, found: 319.0242.

#### 4-(3, 4-dihydroisoquinolin-2(1H)-yl)phenol (1ar)

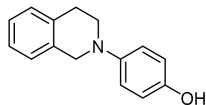

Yellow oil.  $^1\text{H NMR}$  (400 MHz,  $\text{CDCl}_3$ )  $\delta$  7.20-7.06 (m, 4H), 6.93 (d,  $J = 8.4$  Hz, 2H), 6.79 (d,  $J = 8.4$  Hz, 2H), 4.53 (s, 1H), 4.29 (s, 2H), 3.44 (t,  $J = 5.6$  Hz, 2H), 2.98 (t,  $J = 5.8$  Hz, 2H).  $^{13}\text{C NMR}$  (100 MHz,  $\text{CDCl}_3$ )  $\delta$  152.88, 152.71, 134.55, 134.52, 128.69, 126.50, 126.28, 125.93, 118.29, 115.95, 52.76, 48.53, 29.07. **HRMS** (ESI) calculated for  $\text{C}_{15}\text{H}_{16}\text{NO}$  ( $\text{M}+\text{H}$ ) $^+$ : 226.1227, found: 226.1230.

#### 2-(4-nitrophenyl)-1, 2, 3, 4-tetrahydroisoquinoline (1as)

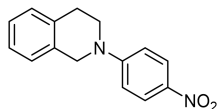

Yellow solid. M. p. 105-106 °C.  $^1\text{H NMR}$  (400 MHz,  $\text{CDCl}_3$ )  $\delta$  8.19-8.15 (m, 2H),  $\delta$  7.26-7.19 (m, 4H), 6.85-6.81 (m, 2H), 4.58 (s, 2H), 3.70 (t,  $J = 5.8$  Hz, 2H), 3.03 (t,  $J = 5.8$  Hz, 2H).  $^{13}\text{C NMR}$  (100 MHz,  $\text{CDCl}_3$ )  $\delta$  153.82, 134.91, 133.12, 128.10, 127.18, 126.72, 126.50, 126.20, 111.20, 100.00, 48.84, 44.76, 28.99. **HRMS** (ESI) calculated for  $\text{C}_{15}\text{H}_{15}\text{N}_2\text{O}_2$  ( $\text{M}+\text{H}$ ) $^+$ : 255.1128, found: 255.1131. Same compound was also reported in previous literature<sup>13</sup> and our characterization data was highly consistent with its data.

#### 6-methoxy-2-phenyl-1, 2, 3, 4-tetrahydroisoquinoline (1at)

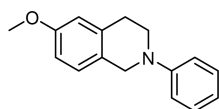

White solid. M. p. 69-70 °C.  $^1\text{H NMR}$  (400 MHz,  $\text{CDCl}_3$ )  $\delta$  7.35-7.24 (m, 2H), 7.06 (d,  $J = 8.4$  Hz, 1H), 6.96 (d,  $J = 8.0$  Hz, 2H), 6.81 (t,  $J = 7.2$  Hz, 1H), 6.75 (dd,  $J = 8.4$ , 2.5 Hz, 1H), 6.69 (s, 1H), 4.34 (s, 2H), 3.78 (s, 3H), 3.53 (t,  $J = 5.8$  Hz, 2H), 2.95 (t,  $J = 5.8$  Hz, 2H).  $^{13}\text{C NMR}$  (100 MHz,  $\text{CDCl}_3$ )  $\delta$  158.10, 136.06, 129.21, 127.53, 126.65, 118.68, 115.18, 113.21, 112.37, 55.31, 50.23, 46.52, 29.41. **HRMS** (ESI) calculated for  $\text{C}_{16}\text{H}_{18}\text{NO}$  ( $\text{M}+\text{H}$ ) $^+$ : 240.1383, found: 240.1378.

#### 6, 7-dimethoxy-2-phenyl-1, 2, 3, 4-tetrahydroisoquinoline (1au)

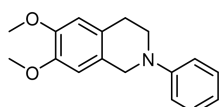

White solid. M. p. 98-99 °C.  $^1\text{H NMR}$  (400 MHz,  $\text{CDCl}_3$ )  $\delta$  7.28 (t,  $J = 7.8$  Hz, 2H), 6.98 (d,  $J = 8.0$  Hz, 2H), 6.82 (t,  $J = 7.2$  Hz, 1H), 6.64 (d,  $J = 4.0$  Hz, 2H), 4.33 (s, 2H), 3.87 (s, 3H), 3.86 (s, 3H), 3.54 (t,  $J = 5.8$  Hz, 2H), 2.89 (t,  $J = 5.4$  Hz, 2H).  $^{13}\text{C NMR}$  (100 MHz,  $\text{CDCl}_3$ )  $\delta$  150.63, 147.61, 147.52, 129.20, 126.69, 126.22, 118.77, 115.35, 111.37, 109.40, 56.01, 55.96, 50.53, 46.76, 28.57. **HRMS** (ESI) calculated for  $\text{C}_{17}\text{H}_{20}\text{NO}_2$  ( $\text{M}+\text{H}$ ) $^+$ : 270.1489, found: 270.1483. Same compound was also reported in previous literature<sup>10</sup> and our characterization data was highly consistent with its data.

#### 7-bromo-2-phenyl-1, 2, 3, 4-tetrahydroisoquinoline (1av)

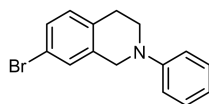

Yellow oil.  $^1\text{H NMR}$  (400 MHz,  $\text{CDCl}_3$ )  $\delta$  7.42-7.38 (m, 4H), 7.11-7.03 (m, 3H), 6.97 (t,  $J = 7.2$  Hz, 1H), 4.43 (s, 2H), 3.61 (t,  $J = 5.8$  Hz, 2H), 2.98 (t,  $J = 5.8$  Hz, 2H).  $^{13}\text{C NMR}$  (100 MHz,  $\text{CDCl}_3$ )  $\delta$  150.33, 136.83, 133.95, 130.38, 129.49, 129.48, 129.40, 119.61, 119.19, 115.51, 50.49, 46.62, 28.58. **HRMS** (ESI) calculated for  $\text{C}_{15}\text{H}_{15}\text{NBr}$  ( $\text{M}+\text{H}$ ) $^+$ : 288.0383, found: 288.0383. Same compound was also reported in previous literature<sup>16</sup> and our characterization data was highly consistent with its data.

#### 5-bromo-2-phenyl-1, 2, 3, 4-tetrahydroisoquinoline (1aw)

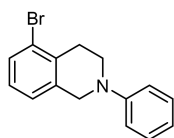

Yellow oil.  $^1\text{H NMR}$  (400 MHz,  $\text{CDCl}_3$ )  $\delta$  7.40 (d,  $J = 7.6$  Hz, 1H), 7.26 (dd,  $J = 8.6$ , 7.2 Hz, 2H), 7.07-6.99 (m, 2H), 6.96 (d,  $J = 7.8$  Hz, 2H), 6.84 (t,  $J = 7.2$  Hz, 1H), 4.33 (s, 2H), 3.52 (t,  $J = 5.8$  Hz, 2H), 2.93 (t,  $J = 6.0$  Hz, 2H).  $^{13}\text{C NMR}$  (100 MHz,  $\text{CDCl}_3$ )  $\delta$  150.37, 137.10, 134.63, 130.44, 129.37, 127.36, 125.79, 125.27, 119.50, 115.96, 51.32, 47.19, 29.82. **HRMS** (ESI) calculated for  $\text{C}_{15}\text{H}_{15}\text{NBr}$  ( $\text{M}+\text{H}$ ) $^+$ : 288.0383, found: 288.0380.

### 2-(pyridin-3-yl)-1, 2, 3, 4-tetrahydroisoquinoline (1ax)

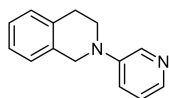

Yellow oil.  $^1\text{H NMR}$  (500 MHz,  $\text{CDCl}_3$ )  $\delta$  8.34 (s, 1H), 8.04 (d,  $J = 4.0$  Hz, 1H), 7.23-7.07 (m, 6H), 4.39 (s, 2H), 3.54 (t,  $J = 5.8$  Hz, 2H), 2.96 (t,  $J = 5.8$  Hz, 2H).  $^{13}\text{C NMR}$  (125 MHz,  $\text{CDCl}_3$ )  $\delta$  146.07, 139.47, 137.26, 134.57, 133.68, 128.53, 126.64, 126.55, 126.27, 123.57, 121.00, 49.76, 45.65, 28.80. **HRMS** (ESI) calculated for  $\text{C}_{14}\text{H}_{15}\text{N}_2$  ( $\text{M}+\text{H}$ ) $^+$ : 211.1230, found: 211.1232. Same compound was also reported in previous literature<sup>17</sup> and our characterization data was highly consistent with its data.

### 6-phenyl-5, 6, 7, 8-tetrahydro-1, 6-naphthyridine (1ay)

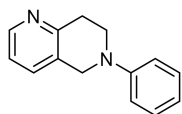

Yellow oil.  $^1\text{H NMR}$  (400 MHz,  $\text{CDCl}_3$ )  $\delta$  8.43 (d,  $J = 4.4$  Hz, 1H), 7.45 (d,  $J = 7.6$  Hz, 1H), 7.30 (t,  $J = 8.0$  Hz, 2H), 7.12 (dd,  $J = 7.6, 4.8$  Hz, 1H), 7.01 (d,  $J = 8.0$  Hz, 2H), 6.87 (t,  $J = 7.4$  Hz, 1H), 4.39 (s, 2H), 3.65 (t,  $J = 5.8$  Hz, 2H), 3.16 (t,  $J = 5.8$  Hz, 2H).  $^{13}\text{C NMR}$  (125 MHz,  $\text{CDCl}_3$ )  $\delta$  155.04, 150.27, 147.70, 134.34, 129.67, 129.31, 121.31, 119.49, 115.76, 50.32, 47.02, 32.20. **HRMS** (ESI) calculated for  $\text{C}_{14}\text{H}_{15}\text{N}_2$  ( $\text{M}+\text{H}$ ) $^+$ : 211.1230, found: 211.1235.

### 2-phenyl-3, 4-dihydroisoquinoline-1(2H)-thione (2a)

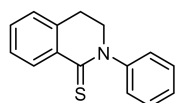

Yellow solid. M. p. 99-100 °C.  $^1\text{H NMR}$  (400 MHz,  $\text{CDCl}_3$ )  $\delta$  8.67 (d,  $J = 8.0$  Hz, 1H), 7.56-7.45 (m, 3H), 7.42-7.36 (m, 4H), 7.22 (d,  $J = 7.4$  Hz, 1H), 4.00 (t,  $J = 6.6$  Hz, 2H), 3.19 (t,  $J = 6.6$  Hz, 2H).  $^{13}\text{C NMR}$  (100 MHz,  $\text{CDCl}_3$ )  $\delta$  193.95, 147.60, 134.15, 133.04, 132.77, 131.93, 129.77, 127.93, 127.22, 126.70, 126.44, 52.51, 28.55. **HRMS** (ESI) calculated for  $\text{C}_{15}\text{H}_{13}\text{NSNa}$  ( $\text{M}+\text{Na}$ ) $^+$ : 261.9661, found: 261.9663.

### 2-phenylisoindoline-1-thione (2b)

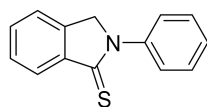

Yellow solid. M. p. 115-116 °C.  $^1\text{H NMR}$  (400 MHz,  $\text{CDCl}_3$ )  $\delta$  8.14 (d,  $J = 7.6$  Hz, 1H), 7.69-7.63 (m, 2H), 7.60 (td,  $J = 7.4, 1.2$  Hz, 1H), 7.56-7.45 (m, 4H), 7.37 (t,  $J = 7.4$  Hz, 1H), 5.03 (s, 2H).  $^{13}\text{C NMR}$  (100 MHz,  $\text{CDCl}_3$ )  $\delta$  193.88, 140.44, 139.98, 139.11, 131.86, 129.25, 128.69, 127.83, 126.30, 125.64, 121.82, 60.31. **HRMS** (ESI) calculated for  $\text{C}_{14}\text{H}_{11}\text{NSNa}$  ( $\text{M}+\text{Na}$ ) $^+$ : 247.9504, found: 247.9507.

### N, N-dimethylbenzothioamide (2c)

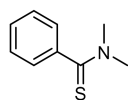

Yellow oil. (25.2 mg).  $^1\text{H NMR}$  (400 MHz,  $\text{CDCl}_3$ )  $\delta$  7.35-7.29 (m, 5H), 3.60 (s, 3H), 3.16 (s, 3H).  $^{13}\text{C NMR}$  (125 MHz,  $\text{CDCl}_3$ )  $\delta$  201.33, 143.41, 128.59, 128.35, 125.75, 44.16, 43.25. **HRMS** (ESI) calculated for  $\text{C}_9\text{H}_{11}\text{NSNa}$  ( $\text{M}+\text{Na}$ ) $^+$ : 187.9504, found: 187.9510.

### 2-(*o*-tolyl)-3, 4-dihydroisoquinoline-1(2*H*)-thione (2aa)

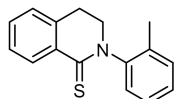

Yellow oil.  $^1\text{H NMR}$  (400 MHz,  $\text{CDCl}_3$ )  $\delta$  8.62 (d,  $J = 8.0$  Hz, 1H), 7.43 (td,  $J = 7.4$ , 1.2 Hz, 1H), 7.35-7.25 (m, 4H), 7.19-7.13 (m, 2H), 3.93-3.74 (m, 2H), 3.22-3.05 (m, 2H), 2.27 (s, 3H).  $^{13}\text{C NMR}$  (100 MHz,  $\text{CDCl}_3$ )  $\delta$  192.89, 146.35, 134.08, 134.04, 133.08, 132.53, 131.95, 131.40, 128.30, 127.64, 127.18, 126.80, 126.15, 51.40, 28.61, 18.15. **HRMS** (ESI) calculated for  $\text{C}_{16}\text{H}_{15}\text{NSNa}$  ( $\text{M}+\text{Na}$ ) $^+$ : 275.9817, found: 275.9821.

### 2-(*m*-tolyl)-3, 4-dihydroisoquinoline-1(2*H*)-thione (2ab)

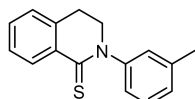

Yellow oil.  $^1\text{H NMR}$  (400 MHz,  $\text{CDCl}_3$ )  $\delta$  8.64 (d,  $J = 8.0$  Hz, 1H), 7.44 (td,  $J = 7.4$ , 1.4 Hz, 1H), 7.39-7.33 (m, 2H), 7.19 (t,  $J = 5.8$  Hz, 2H), 7.15-7.11 (m, 2H), 3.94 (t,  $J = 6.8$  Hz, 2H), 3.14 (t,  $J = 6.4$  Hz, 2H), 2.40 (s, 3H).  $^{13}\text{C NMR}$  (100 MHz,  $\text{CDCl}_3$ )  $\delta$  193.76, 147.59, 139.80, 134.21, 133.03, 132.76, 131.83, 129.53, 128.70, 127.17, 126.83, 126.65, 123.39, 52.56, 28.55, 21.42. **HRMS** (ESI) calculated for  $\text{C}_{16}\text{H}_{15}\text{NSNa}$  ( $\text{M}+\text{Na}$ ) $^+$ : 275.9817, found: 275.9819.

### 2-(*p*-tolyl)-3, 4-dihydroisoquinoline-1(2*H*)-thione (2ac)

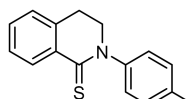

Yellow oil.  $^1\text{H NMR}$  (400 MHz,  $\text{CDCl}_3$ )  $\delta$  8.67 (d,  $J = 7.6$  Hz, 1H), 7.47 (t,  $J = 7.4$  Hz, 1H), 7.39 (q,  $J = 8.0$  Hz, 2H), 7.29 (d,  $J = 9.8$  Hz, 1H), 7.24-7.19 (m, 2H), 7.17 (s, 1H), 3.98 (t,  $J = 6.6$  Hz, 2H), 3.17 (t,  $J = 6.6$  Hz, 2H), 2.43 (s, 3H).  $^{13}\text{C NMR}$  (100 MHz,  $\text{CDCl}_3$ )  $\delta$  193.90, 145.11, 137.80, 134.19, 133.04, 132.79, 131.86, 130.41, 127.18, 126.66, 126.07, 52.59, 28.54, 21.30. **HRMS** (ESI) calculated for  $\text{C}_{16}\text{H}_{15}\text{NSNa}$  ( $\text{M}+\text{Na}$ ) $^+$ : 275.9817, found: 275.9820.

### 2-(3, 5-dimethylphenyl)-3, 4-dihydroisoquinoline-1(2*H*)-thione (2ad)

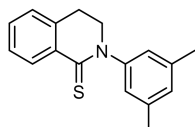

Yellow solid. M. p. 95-96 °C.  $^1\text{H NMR}$  (400 MHz,  $\text{CDCl}_3$ )  $\delta$  8.64 (d,  $J = 8.0$  Hz, 1H), 7.45 (t,  $J = 7.4$  Hz, 1H), 7.36 (t,  $J = 7.2$  Hz, 1H), 7.19 (d,  $J = 7.4$  Hz, 1H), 7.01 (s, 1H), 6.94 (s, 2H), 3.93 (t,  $J = 6.6$  Hz, 2H), 3.14 (t,  $J = 6.6$  Hz, 2H), 2.36 (s, 6H).  $^{13}\text{C NMR}$

(100 MHz, CDCl<sub>3</sub>)  $\delta$  193.56, 147.54, 139.56, 134.21, 133.05, 132.75, 131.82, 129.69, 127.17, 126.64, 123.80, 52.61, 28.53, 21.37. **HRMS** (ESI) calculated for C<sub>17</sub>H<sub>17</sub>NSNa (M+Na)<sup>+</sup>: 290.0974, found: 290.0979.

**2-(4-methoxyphenyl)-3, 4-dihydroisoquinoline-1(2H)-thione (2ae)**

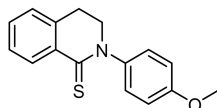

Yellow solid. M. p. 134-135 °C. **<sup>1</sup>H NMR** (400 MHz, CDCl<sub>3</sub>)  $\delta$  8.64 (d, *J* = 8.0 Hz, 1H), 7.44 (td, *J* = 7.8, 1.6 Hz, 1H), 7.34 (td, *J* = 8.0, 1.2 Hz, 1H), 7.28-7.22 (m, 2H), 7.18 (d, *J* = 7.4 Hz, 1H), 7.01-6.95 (m, 2H), 3.94 (t, *J* = 6.8 Hz, 2H), 3.84 (s, 3H), 3.14 (t, *J* = 6.4 Hz, 2H). **<sup>13</sup>C NMR** (100 MHz, CDCl<sub>3</sub>)  $\delta$  194.15, 158.76, 140.60, 134.25, 133.02, 132.84, 131.80, 127.39, 127.14, 126.62, 114.86, 55.45, 52.74, 28.55. **HRMS** (ESI) calculated for C<sub>16</sub>H<sub>15</sub>NOSNa (M+Na)<sup>+</sup>: 291.9766, found: 291.9770.

**2-(3-chlorophenyl)-3, 4-dihydroisoquinoline-1(2H)-thione (2af)**

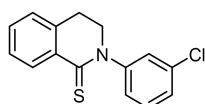

Yellow oil. **<sup>1</sup>H NMR** (400 MHz, CDCl<sub>3</sub>)  $\delta$  8.60 (d, *J* = 7.8 Hz, 1H), 7.45 (t, *J* = 6.8 Hz, 1H), 7.39 (d, *J* = 8.0 Hz, 1H), 7.36-7.32 (m, 3H), 7.24 (d, *J* = 9.0 Hz, 1H), 7.18 (d, *J* = 7.4 Hz, 1H), 3.93 (t, *J* = 6.6 Hz, 2H), 3.14 (t, *J* = 6.6 Hz, 2H). **<sup>13</sup>C NMR** (100 MHz, CDCl<sub>3</sub>)  $\delta$  194.28, 148.38, 135.09, 133.93, 132.99, 132.73, 132.17, 130.74, 128.17, 127.30, 127.07, 126.84, 125.07, 52.41, 28.52. **HRMS** (ESI) calculated for C<sub>15</sub>H<sub>12</sub>NSClNa (M+Na)<sup>+</sup>: 296.6672, found: 296.6676.

**2-(4-chlorophenyl)-3, 4-dihydroisoquinoline-1(2H)-thione (2ag)**

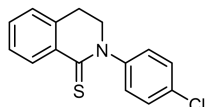

Yellow solid. M. p. 151-153 °C. **<sup>1</sup>H NMR** (400 MHz, CDCl<sub>3</sub>)  $\delta$  8.65 (d, *J* = 7.8 Hz, 1H), 7.50-7.46 (m, 3H), 7.38 (t, *J* = 7.4 Hz, 1H), 7.31 (d, *J* = 8.6 Hz, 2H), 7.22 (d, *J* = 7.4 Hz, 1H), 3.97 (t, *J* = 6.4 Hz, 2H), 3.18 (t, *J* = 6.6 Hz, 2H). **<sup>13</sup>C NMR** (100 MHz, CDCl<sub>3</sub>)  $\delta$  194.33, 145.91, 133.97, 133.57, 132.95, 132.77, 132.13, 130.00, 128.00, 127.30, 126.78, 52.43, 28.51. **HRMS** (ESI) calculated for C<sub>15</sub>H<sub>12</sub>NSClNa (M+Na)<sup>+</sup>: 296.6672, found: 296.6678.

**2-(3-bromophenyl)-3, 4-dihydroisoquinoline-1(2H)-thione (2ah)**

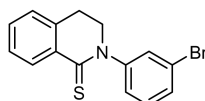

Yellow oil. **<sup>1</sup>H NMR** (400 MHz, CDCl<sub>3</sub>)  $\delta$  8.60 (d, *J* = 8.0 Hz, 1H), 7.45 (td, *J* = 7.4, 1.4 Hz, 1H), 7.42-7.38 (m, 1H), 7.38-7.31 (m, 3H), 7.24-7.22 (m, 1H), 7.19 (d, *J* = 6.8 Hz, 1H), 3.93 (t, *J* = 6.6 Hz, 2H), 3.14 (t, *J* = 6.6 Hz, 2H). **<sup>13</sup>C NMR** (100 MHz, CDCl<sub>3</sub>)  $\delta$  194.28, 148.38, 135.09, 133.92, 133.00, 132.72, 132.17, 130.74, 128.16,

127.29, 127.07, 126.84, 125.07, 52.41, 28.51. **HRMS** (ESI) calculated for  $C_{15}H_{12}NSBrNa$  ( $M+Na$ )<sup>+</sup>: 339.8766, found: 339.8770.

#### 2-(4-bromophenyl)-3, 4-dihydroisoquinoline-1(2H)-thione (2ai)

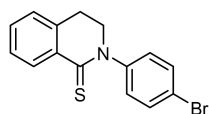

Yellow solid. M. p. 145-146 °C. **<sup>1</sup>H NMR** (400 MHz,  $CDCl_3$ )  $\delta$  8.62 (dd,  $J = 8.0, 1.2$  Hz, 1H), 7.64-7.55 (m, 2H), 7.46 (td,  $J = 7.4, 1.4$  Hz, 1H), 7.36 (td,  $J = 7.8, 1.4$  Hz, 1H), 7.25-7.17 (m, 3H), 3.94 (t,  $J = 6.6$  Hz, 2H), 3.16 (t,  $J = 6.6$  Hz, 2H). **<sup>13</sup>C NMR** (100MHz,  $CDCl_3$ )  $\delta$  194.27, 146.42, 133.96, 132.98, 132.93, 132.77, 132.13, 128.34, 127.31, 126.77, 121.61, 52.38, 28.51. **HRMS** (ESI) calculated for  $C_{15}H_{12}NSBrNa$  ( $M+Na$ )<sup>+</sup>: 339.8766, found: 339.8772.

#### 4-(1-thioxo-3, 4-dihydroisoquinolin-2(1H)-yl)benzonitrile (2aj)

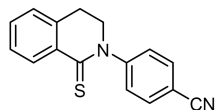

Yellow solid. M. p. 105-106 °C. **<sup>1</sup>H NMR** (400 MHz,  $CDCl_3$ )  $\delta$  8.61 (d,  $J = 8.0$  Hz, 1H), 7.81-7.73 (m, 2H), 7.52-7.48 (m, 3H), 7.38 (t,  $J = 7.8$  Hz, 1H), 7.23 (d,  $J = 7.4$  Hz, 1H), 3.99 (t,  $J = 6.4$  Hz, 2H), 3.20 (t,  $J = 6.4$  Hz, 2H). **<sup>13</sup>C NMR** (100 MHz,  $CDCl_3$ )  $\delta$  194.54, 151.05, 133.71, 133.67, 132.95, 132.66, 132.46, 128.01, 127.40, 126.95, 118.25, 111.57, 52.12, 28.48. **HRMS** (ESI) calculated for  $C_{16}H_{12}N_2SNa$  ( $M+Na$ )<sup>+</sup>: 286.9613, found: 286.9616.

#### 1-(4-(1-thioxo-3, 4-dihydroisoquinolin-2(1H)-yl)phenyl)ethan-1-one (2ak)

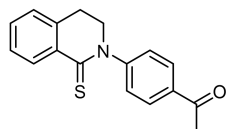

Yellow solid. M. p. 163-164 °C. **<sup>1</sup>H NMR** (400 MHz,  $CDCl_3$ )  $\delta$  8.63 (d,  $J = 8.0$  Hz, 1H), 8.09 (d,  $J = 8.4$  Hz, 2H), 7.47 (t,  $J = 7.8$  Hz, 3H), 7.37 (t,  $J = 7.6$  Hz, 1H), 7.21 (d,  $J = 7.4$  Hz, 1H), 3.98 (t,  $J = 6.4$  Hz, 2H), 3.19 (t,  $J = 6.6$  Hz, 2H), 2.63 (s, 3H). **<sup>13</sup>C NMR** (100 MHz,  $CDCl_3$ )  $\delta$  197.00, 194.24, 151.37, 136.19, 133.89, 132.94, 132.70, 132.24, 129.97, 127.36, 126.99, 126.82, 52.21, 28.52, 26.72. **HRMS** (ESI) calculated for  $C_{17}H_{15}NOSNa$  ( $M+Na$ )<sup>+</sup>: 303.9766, found: 303.9771.

#### phenyl(4-(1-thioxo-3, 4-dihydroisoquinolin-2(1H)-yl)phenyl)methanone (2al)

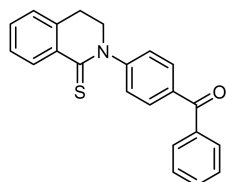

Yellow solid. M. p. 154-156 °C. **<sup>1</sup>H NMR** (400 MHz,  $CDCl_3$ )  $\delta$  8.67 (d,  $J = 7.6$  Hz, 1H), 7.97 (d,  $J = 8.4$  Hz, 2H), 7.88 (d,  $J = 7.2$  Hz, 2H), 7.64 (t,  $J = 7.4$  Hz, 1H), 7.58-7.47 (m, 5H), 7.40 (t,  $J = 7.4$  Hz, 1H), 7.24 (d,  $J = 7.4$  Hz, 1H), 4.03 (t,  $J = 6.6$



Hz, 2H), 3.22 (t,  $J = 6.4$  Hz, 2H).  $^{13}\text{C}$  NMR (100 MHz,  $\text{CDCl}_3$ )  $\delta$  195.62, 194.23, 150.88, 137.31, 136.67, 133.96, 132.96, 132.74, 132.64, 132.22, 131.68, 130.06, 128.42, 127.36, 126.81, 126.71, 52.33, 28.54. HRMS (ESI) calculated for  $\text{C}_{22}\text{H}_{17}\text{NOSNa}$  ( $\text{M}+\text{Na}$ ) $^+$ : 365.9923, found: 365.9925.

#### methyl 4-(1-thioxo-3, 4-dihydroisoquinolin-2(*1H*)-yl)benzoate (2am)

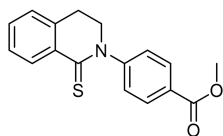

Yellow solid. M. p. 142-144 °C.  $^1\text{H}$  NMR (500 MHz,  $\text{CDCl}_3$ )  $\delta$  8.62 (d,  $J = 8.0$  Hz, 1H), 8.16 (d,  $J = 8.6$  Hz, 2H), 7.47 (td,  $J = 7.4, 1.2$  Hz, 1H), 7.43 (d,  $J = 8.6$  Hz, 2H), 7.35 (d,  $J = 7.8$  Hz, 1H), 7.20 (d,  $J = 7.5$  Hz, 1H), 3.97 (t,  $J = 6.5$  Hz, 2H), 3.94 (s, 3H), 3.17 (t,  $J = 6.5$  Hz, 2H).  $^{13}\text{C}$  NMR (125 MHz,  $\text{CDCl}_3$ )  $\delta$  194.20, 166.26, 151.30, 133.93, 132.96, 132.70, 132.18, 131.23, 129.46, 127.32, 126.80, 126.78, 52.32, 52.23, 28.52. HRMS (ESI) calculated for  $\text{C}_{17}\text{H}_{15}\text{NO}_2\text{SNa}$  ( $\text{M}+\text{Na}$ ) $^+$ : 319.9715, found: 319.9720.

#### 2-(4-(methylsulfonyl)phenyl)-3, 4-dihydroisoquinoline-1(2H)-thione (2an)

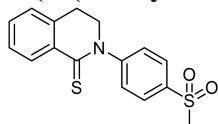

Red solid. M. p. 194-196 °C.  $^1\text{H}$  NMR (500 MHz,  $\text{CDCl}_3$ )  $\delta$  8.61 (d,  $J = 8.0$  Hz, 1H), 8.06 (d,  $J = 8.6$  Hz, 2H), 7.58 (d,  $J = 8.6$  Hz, 2H), 7.49 (td,  $J = 7.5, 1.3$  Hz, 1H), 7.38 (t,  $J = 7.2$  Hz, 1H), 7.22 (d,  $J = 7.5$  Hz, 1H), 3.99 (t,  $J = 6.5$  Hz, 2H), 3.20 (t,  $J = 6.5$  Hz, 2H), 3.13 (s, 3H).  $^{13}\text{C}$  NMR (125 MHz,  $\text{CDCl}_3$ )  $\delta$  194.60, 151.93, 139.58, 133.75, 132.90, 132.72, 132.46, 129.17, 128.00, 127.44, 126.90, 52.25, 44.57, 28.51. HRMS (ESI) calculated for  $\text{C}_{16}\text{H}_{15}\text{NO}_2\text{S}_2\text{Na}$  ( $\text{M}+\text{Na}$ ) $^+$ : 339.9436, found: 339.9440.

#### 4-(1-thioxo-3, 4-dihydroisoquinolin-2(*1H*)-yl)benzoic acid (2ao)

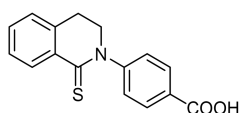

Yellow solid. M. p. 240-242 °C.  $^1\text{H}$  NMR (500 MHz,  $\text{DMSO-d}_6$ )  $\delta$  12.95 (s, 1H), 8.43 (d,  $J = 8.0$  Hz, 1H), 8.04 (d,  $J = 8.5$  Hz, 2H), 7.57-7.53 (m, 3H), 7.39 (t,  $J = 7.6$  Hz, 1H), 7.35 (d,  $J = 7.5$  Hz, 1H), 3.98 (t,  $J = 6.5$  Hz, 2H), 3.19 (t,  $J = 6.5$  Hz, 2H).  $^{13}\text{C}$  NMR (125 MHz,  $\text{DMSO-d}_6$ )  $\delta$  192.84, 167.22, 151.57, 134.50, 133.84, 132.57, 132.18, 130.97, 130.16, 127.68, 127.59, 127.17, 52.43, 27.92. HRMS (ESI) calculated for  $\text{C}_{16}\text{H}_{12}\text{NO}_2\text{S}$  ( $\text{M}-\text{H}$ ) $^-$ : 282.0594, found: 282.0586.

#### 4-(1-thioxo-3, 4-dihydroisoquinolin-2(*1H*)-yl)benzaldehyde (2ap)

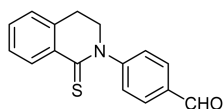

Yellow solid. M. p. 168-170 °C.  $^1\text{H}$  NMR (400 MHz,  $\text{CDCl}_3$ )  $\delta$  10.05 (s, 1H), 8.62 (dd,  $J = 8.0, 1.0$  Hz, 1H), 8.05 – 7.99 (m, 2H), 7.58 – 7.52 (m, 2H), 7.49 (td,  $J = 7.4,$

1.2 Hz, 1H), 7.38 (t,  $J = 7.6$  Hz, 1H), 7.22 (d,  $J = 7.6$  Hz, 1H), 4.00 (t,  $J = 6.6$  Hz, 2H), 3.20 (t,  $J = 6.6$  Hz, 2H).  $^{13}\text{C}$  NMR (100 MHz,  $\text{CDCl}_3$ )  $\delta$  194.37, 191.09, 152.45, 135.37, 133.85, 132.91, 132.71, 132.32, 131.19, 127.62, 127.40, 126.84, 52.17, 28.53. HRMS (ESI) calculated for  $\text{C}_{16}\text{H}_{13}\text{NOSNa}$  ( $\text{M}+\text{Na}$ ) $^+$ : 289.9610, found: 289.9612.

#### *N,N*-dimethyl-4-(1-thioxo-3,4-dihydroisoquinolin-2(1*H*)-yl)benzothioamide (2aq)

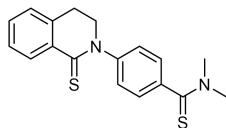

Yellow solid. M. p. 199-201 °C.  $^1\text{H}$  NMR (500 MHz,  $\text{CDCl}_3$ )  $\delta$  8.62 (d,  $J = 8.0$  Hz, 1H), 7.46 (t,  $J = 7.4$  Hz, 1H), 7.43 (d,  $J = 8.4$  Hz, 2H), 7.39-7.32 (m, 3H), 7.20 (d,  $J = 7.4$  Hz, 1H), 3.96 (t,  $J = 6.8$  Hz, 2H), 3.63 (s, 3H), 3.28 (s, 3H), 3.16 (t,  $J = 6.6$  Hz, 2H).  $^{13}\text{C}$  NMR (125 MHz,  $\text{CDCl}_3$ )  $\delta$  200.13, 194.13, 147.47, 142.58, 134.05, 133.03, 132.74, 132.09, 127.27, 127.25, 126.76, 126.67, 52.41, 44.51, 43.29, 28.51. HRMS (ESI) calculated for  $\text{C}_{18}\text{H}_{18}\text{N}_2\text{S}_2\text{Na}$  ( $\text{M}+\text{Na}$ ) $^+$ : 348.9803, found: 348.9810.

#### 6-methoxy-2-phenyl-3,4-dihydroisoquinoline-1(2*H*)-thione (2at)

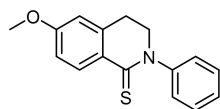

Yellow solid. M. p. 126-127 °C.  $^1\text{H}$  NMR (400 MHz,  $\text{CDCl}_3$ )  $\delta$  8.62 (d,  $J = 8.8$  Hz, 1H), 7.48 (t,  $J = 7.8$  Hz, 2H), 7.40-7.31 (m, 3H), 6.86 (dd,  $J = 8.8, 2.6$  Hz, 1H), 6.66 (d,  $J = 2.4$  Hz, 1H), 3.95 (t,  $J = 6.6$  Hz, 2H), 3.87 (s, 3H), 3.11 (t,  $J = 6.6$  Hz, 2H).  $^{13}\text{C}$  NMR (100 MHz,  $\text{CDCl}_3$ )  $\delta$  193.34, 162.68, 147.67, 135.37, 135.21, 129.67, 127.80, 127.63, 126.55, 112.71, 111.51, 55.56, 52.37, 28.84. HRMS (ESI) calculated for  $\text{C}_{16}\text{H}_{15}\text{NOSNa}$  ( $\text{M}+\text{Na}$ ) $^+$ : 291.9766, found: 291.9771.

#### 6,7-dimethoxy-2-phenyl-3,4-dihydroisoquinoline-1(2*H*)-thione (2au)

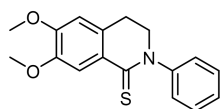

Yellow solid. M. p. 129-130 °C.  $^1\text{H}$  NMR (400 MHz,  $\text{CDCl}_3$ )  $\delta$  8.26 (s, 1H), 7.50 (t,  $J = 7.8$  Hz, 2H), 7.40-7.34 (m, 3H), 6.65 (s, 1H), 3.98-3.95 (m, 8H), 3.10 (t,  $J = 6.8$  Hz, 2H).  $^{13}\text{C}$  NMR (100 MHz,  $\text{CDCl}_3$ )  $\delta$  193.17, 152.39, 147.81, 147.74, 129.68, 127.80, 127.27, 126.89, 126.54, 115.35, 108.70, 56.19, 56.18, 52.55, 28.16. HRMS (ESI) calculated for  $\text{C}_{17}\text{H}_{17}\text{NO}_2\text{SNa}$  ( $\text{M}+\text{Na}$ ) $^+$ : 321.9872, found: 321.9875.

#### 7-bromo-2-phenyl-3,4-dihydroisoquinoline-1(2*H*)-thione (2av)

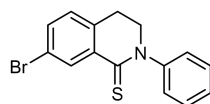

Yellow solid. M. p. 124-125 °C.  $^1\text{H}$  NMR (400 MHz,  $\text{CDCl}_3$ )  $\delta$  8.81 (d,  $J = 1.6$  Hz, 1H), 7.58 (dd,  $J = 8.0, 2.0$  Hz, 1H), 7.52 (t,  $J = 7.6$  Hz, 2H), 7.44-7.39 (m, 1H), 7.34 (d,  $J = 7.2$  Hz, 2H), 7.11 (d,  $J = 8.0$  Hz, 1H), 4.10-3.98 (t,  $J = 6.8$  Hz, 2H), 3.13 (t,  $J = 6.4$  Hz, 2H).  $^{13}\text{C}$  NMR (100 MHz,  $\text{CDCl}_3$ )  $\delta$  192.22, 147.34, 135.30, 134.58, 131.83,

129.85, 128.51, 128.10, 126.31, 120.93, 52.37, 28.09. **HRMS** (ESI) calculated for  $C_{15}H_{12}NSBrNa$  ( $M+Na$ )<sup>+</sup>: 339.8766, found: 339.8769.

#### 5-bromo-2-phenyl-3, 4-dihydroisoquinoline-1(2H)-thione (2aw)

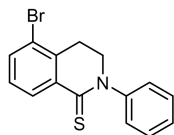

Yellow solid. M. p. 137-138 °C. **<sup>1</sup>H NMR** (400 MHz,  $CDCl_3$ )  $\delta$  8.64 (d,  $J = 8.0$  Hz, 1H), 7.69 (d,  $J = 8.0$  Hz, 1H), 7.50 (t,  $J = 7.6$  Hz, 2H), 7.40 (d,  $J = 7.6$  Hz, 1H), 7.36-7.31 (m, 2H), 7.23 (t,  $J = 8.0$  Hz, 1H), 3.97 (t,  $J = 6.8$  Hz, 2H), 3.27 (t,  $J = 6.6$  Hz, 2H). **<sup>13</sup>C NMR** (100 MHz,  $CDCl_3$ )  $\delta$  192.68, 147.34, 136.02, 135.56, 132.99, 132.20, 129.85, 128.10, 128.03, 126.28, 122.54, 51.91, 28.47. **HRMS** (ESI) calculated for  $C_{15}H_{12}NSBrNa$  ( $M+Na$ )<sup>+</sup>: 339.8766, found: 339.8771.

#### 2-(pyridin-3-yl)-3, 4-dihydroisoquinoline-1(2H)-thione (2ax)

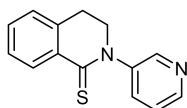

Yellow oil. **<sup>1</sup>H NMR** (500 MHz,  $CDCl_3$ )  $\delta$  8.56-8.54 (m, 2H), 8.53 (s, 1H), 7.65 (d,  $J = 8.0$  Hz, 1H), 7.40 (t,  $J = 7.5$  Hz, 1H), 7.35 (dd,  $J = 8.0, 4.8$  Hz, 1H), 7.30 (t,  $J = 7.8$  Hz, 1H), 7.14 (d,  $J = 7.5$  Hz, 1H), 3.92 (t,  $J = 6.5$  Hz, 2H), 3.12 (t,  $J = 6.5$  Hz, 2H). **<sup>13</sup>C NMR** (125 MHz,  $CDCl_3$ )  $\delta$  195.13, 148.68, 148.08, 144.02, 134.58, 133.83, 132.96, 132.76, 132.30, 127.36, 126.86, 124.06, 52.40, 28.53. **HRMS** (ESI) calculated for  $C_{14}H_{12}N_2SNa$  ( $M+Na$ )<sup>+</sup>: 262.9613, found: 262.9616.

#### 6-phenyl-1, 6-naphthyridine-5(6H)-thione (2ay)

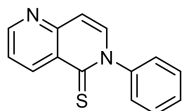

Yellow solid. M. p. 141-143 °C. **<sup>1</sup>H NMR** (500 MHz,  $CDCl_3$ )  $\delta$  9.32 (d,  $J = 8.5$  Hz, 1H), 8.99 (d,  $J = 4.0$  Hz, 1H), 7.65-7.55 (m, 3H), 7.51 (dd,  $J = 8.4, 5.2$  Hz, 2H), 7.38 (d,  $J = 8.0$  Hz, 2H), 7.18 (d,  $J = 7.5$  Hz, 1H). **<sup>13</sup>C NMR** (125 MHz,  $CDCl_3$ )  $\delta$  186.82, 155.23, 148.90, 145.64, 140.70, 137.46, 130.47, 129.89, 129.14, 126.93, 123.57, 113.29. **HRMS** (ESI) calculated for  $C_{14}H_{10}N_2SNa$  ( $M+Na$ )<sup>+</sup>: 260.9457, found: 260.9460.

## 6. References

- (1) Wu, X.; Chen, D. F.; Chen, S. S.; Zhu, Y. F. Synthesis of Polycyclic Amines through Mild Metal-Free Tandem Cross-Dehydrogenative Coupling/Intramolecular Hydroarylation of N-Aryltetrahydroisoquinolines and Crotonaldehyde. *Eur. J. Org. Chem.* **2015**, 2015, 468-473.
- (2) Brzozowski, M.; Forni, J. A.; G., P. S.; Polyzos, A. The Direct A-C(Sp<sup>3</sup>)-H Functionalisation of N-Aryl Tetrahydroisoquinolines Via an Iron-Catalysed Aerobic

Nitro-Mannich Reaction and Continuous Flow Processing. *Chem. Commun.* **2015**, *51*, 334-337.

(3) Meneyrol, J.; Helissey, P.; Tratat, C.; Giorgi-Renault, S.; Husson, H. A Facile Route for the Preparation of N-Phenyl Tetrahydroquinolines and Tetrahydroisoquinolines. *Synthetic Commun.* **2001**, *31*, 987-992.

(4) Frisch, M. J.; Trucks, G. W.; Schlegel, H. B.; Scuseria, G. E.; Robb, M. A.; Cheeseman, J. R.; Scalmani, G.; Barone, V.; Mennucci, B.; Petersson, G. A.; Nakatsuji, H.; Caricato, M.; Li, X.; Hratchian, H. P.; Izmaylov, A. F.; Bloino, J.; Zheng, G.; Sonnenberg, J. L.; Hada, M.; Ehara, M.; Toyota, K.; Fukuda, R.; Hasegawa, J.; Ishida, M.; Nakajima, T.; Honda, Y.; Kitao, O.; Nakai, H.; Vreven, T.; Montgomery Jr, J. A.; Peralta, J. E.; Ogliaro, F.; Bearpark, M.; Heyd, J. J.; Brothers, E.; Kudin, K. N.; Staroverov, V. N.; Kobayashi, R.; Normand, J.; Raghavachari, K.; Rendell, A.; Burant, J. C.; Iyengar, S. S.; Tomasi, J.; Cossi, M.; Rega, N.; Millam, J. M.; Klene, M.; Knox, J. E.; Cross, J. B.; Bakken, V.; Adamo, C.; Jaramillo, J.; Gomperts, R.; Stratmann, R. E.; Yazyev, O.; Austin, A. J.; Cammi, R.; Pomelli, C.; Ochterski, J. W.; Martin, R. L.; Morokuma, K.; Zakrzewski, V. G.; Voth, G. A.; Salvador, P.; Dannenberg, J. J.; Dapprich, S.; Daniels, A. D.; Farkas, Ö.; Foresman, J. B.; Ortiz, J. V.; Cioslowski, J.; Fox, D. J. *Gaussian 09, In Gaussian, Inc., Wallingford CT.* **2009**.

(5) Kohn, W. Nobel Lecture: Electronic Structure of Matter-Wave Functions and Density Functionals. *Rev. Mod. Phys.* **1999**, *71*, 1253-1266.

(6) Lee, C.; Yang, W.; Parr, R. G. Development of the Colle-Salvetti Correlation-Energy Formula into a Functional of the Electron Density. *Phys. Rev. B* **1988**, *37*, 785-789.

(7) McLean, A. D.; Chandler, G. S. Contracted Gaussian Basis Sets for Molecular Calculations. I. Second Row Atoms,  $Z = 11-18$ . *J. Chem. Phys.* **1980**, *72*, 5639-5648.

(8) Cancès, E.; Mennucci, B.; Tomasi, J. A New Integral Equation Formalism for the Polarizable Continuum Model: Theoretical Background and Applications to Isotropic and Anisotropic Dielectrics. *J. Chem. Phys.* **1997**, *107*, 3032-3041.

(9) Yi, B.; Yan, N.; Yi, N.; Xie, Y.; Wen, X.; Au, C. T.; Lan, D. Oxidative Cyanation of N-Aryltetrahydroisoquinoline Induced by Visible Light for the Synthesis of A-Aminonitrile Using Potassium Thiocyanate as "Cn" Agent. *RSC Adv.* **2019**, *9*, 29721-29725.

(10) Espelt, L. R.; Wiensch, E. M.; Yoon, T. P. Brønsted Acid Cocatalysts in Photocatalytic Radical Addition of A-Amino C-H Bonds across Michael Acceptors. *J. Org. Chem.* **2013**, *78*, 4107-4114.

(11) Aganda, K. C. C.; Hong, B.; Lee, A. Aerobic A-Oxidation of N-Substituted Tetrahydroisoquinolines to Dihydroisoquinolones Via Organo-Photocatalysis. *Adv. Synth. Catal.* **2019**, *361*, 1124-1129.

(12) Lin, S.; Sun, G.; Kang, Q. A Visible-Light-Activated Rhodium Complex in Enantioselective Conjugate Addition of A-Amino Radicals with Michael Acceptors. *Chem. Commun.* **2017**, *53*, 7665-7668.

(13) Forni, J. A.; Brzozowski, M.; Tsanaktisidis, J.; Savage, G. P.; Polyzos, A. Rapid

Microwave-Assisted Synthesis of N-Aryl 1, 2, 3, 4-Tetrahydroisoquinolines. *Aust. J. Chem.* **2015**, *68*, 1890-1893.

(14) Jong, J. D.; Heijnen, D.; Helbert, H.; Feringa, B. L. One-Pot, Modular Approach to Functionalized Ketones Via Nucleophilic Addition/Buchwald-Hartwig Amination Strategy. *Chem. Commun.* **2019**, *55*, 2908-2911.

(15) Han, D.; Li, S.; Xia, S.; Su, M.; Jin, J. Nickel-Catalyzed Amination of (Hetero) Aryl Halides Facilitated by a Catalytic Pyridinium Additive. *Chem. Eur. J.* **2020**, *26*, 12349-12354.

(16) Pramanik, M. M. D.; Nagode, S. B.; Kant, R.; Rastogi, N. Visible Light Catalyzed Mannich Reaction between Tert-Amines and Silyl Diazoenolates. *Org. Biomol. Chem.* **2017**, *15*, 7369-7373.

(17) Samblanet, D. C.; Schmidt, J. A. R. Efficient Catalytic Aryl Amination of Bromoarenes Using 3-Iminophosphine Palladium(I) Chloride. *J. Org. Chem.* **2012**, *720*, 7-18.

# 7. <sup>1</sup>H and <sup>13</sup>C NMR Spectra

## NMR of 2a

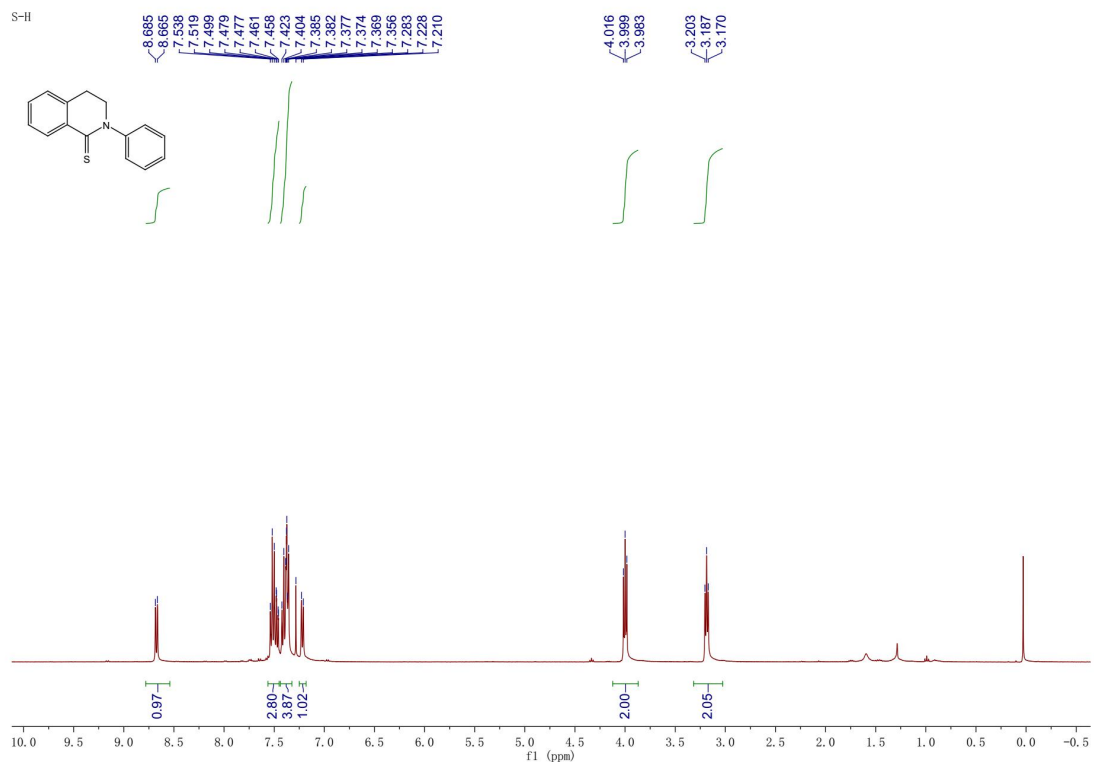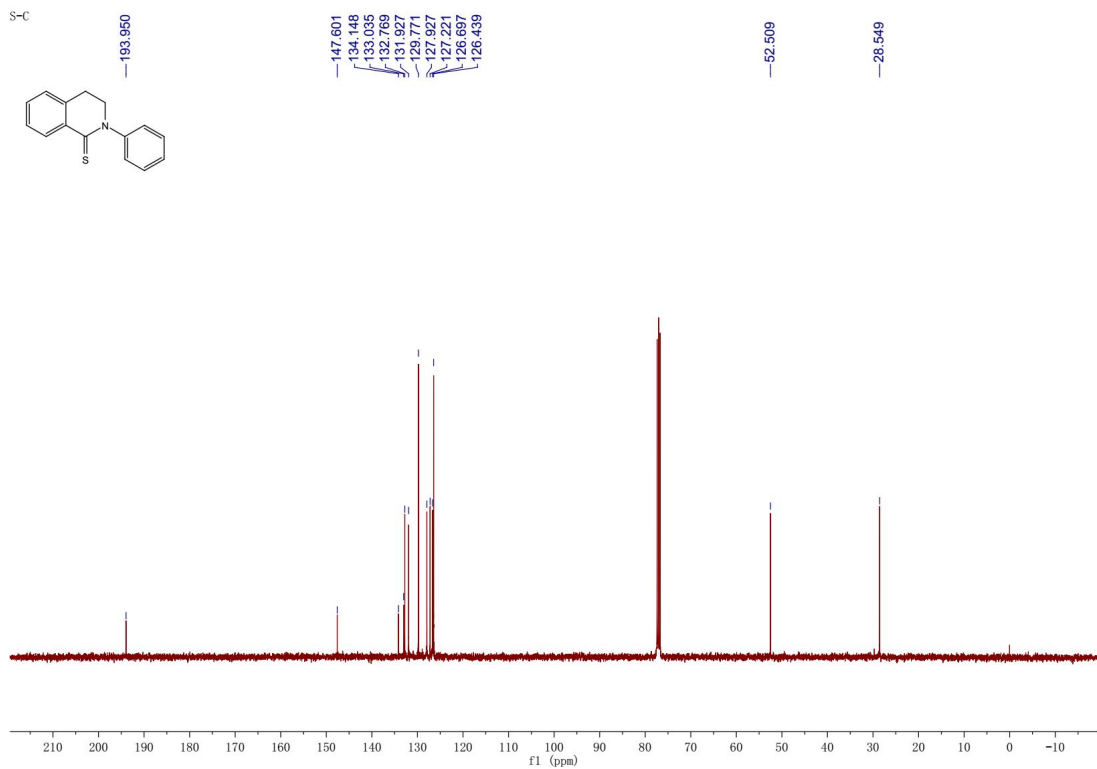

# NMR of 2b

S-1-H

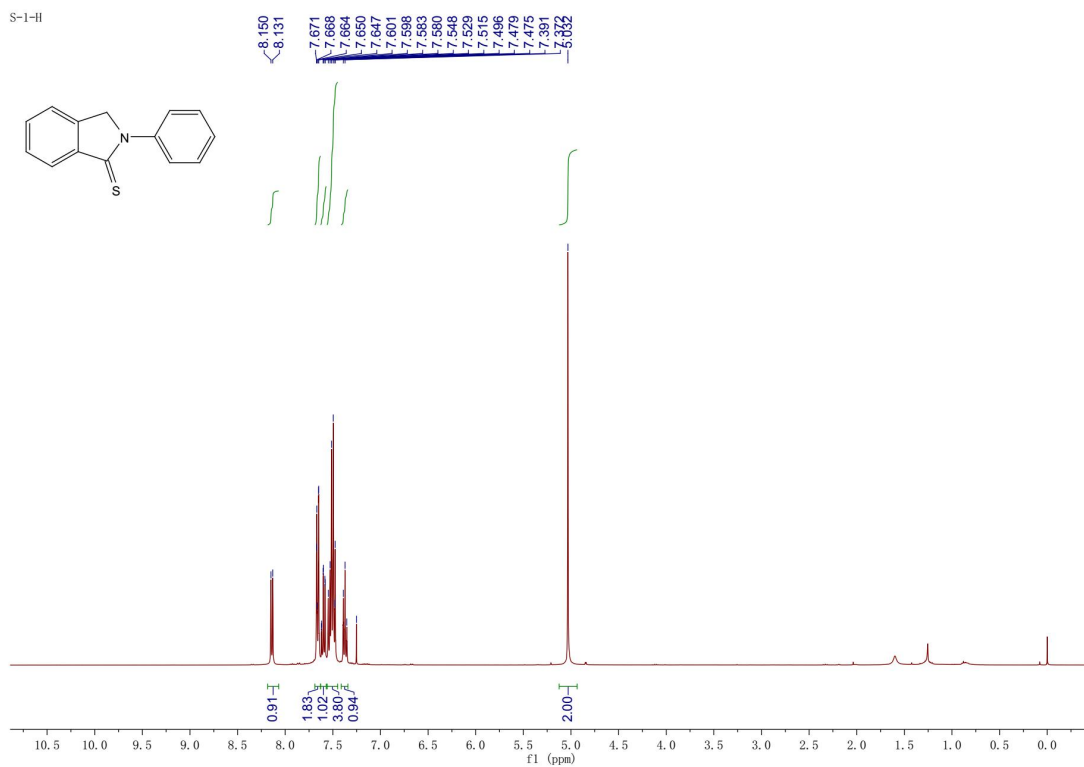

S-1-C

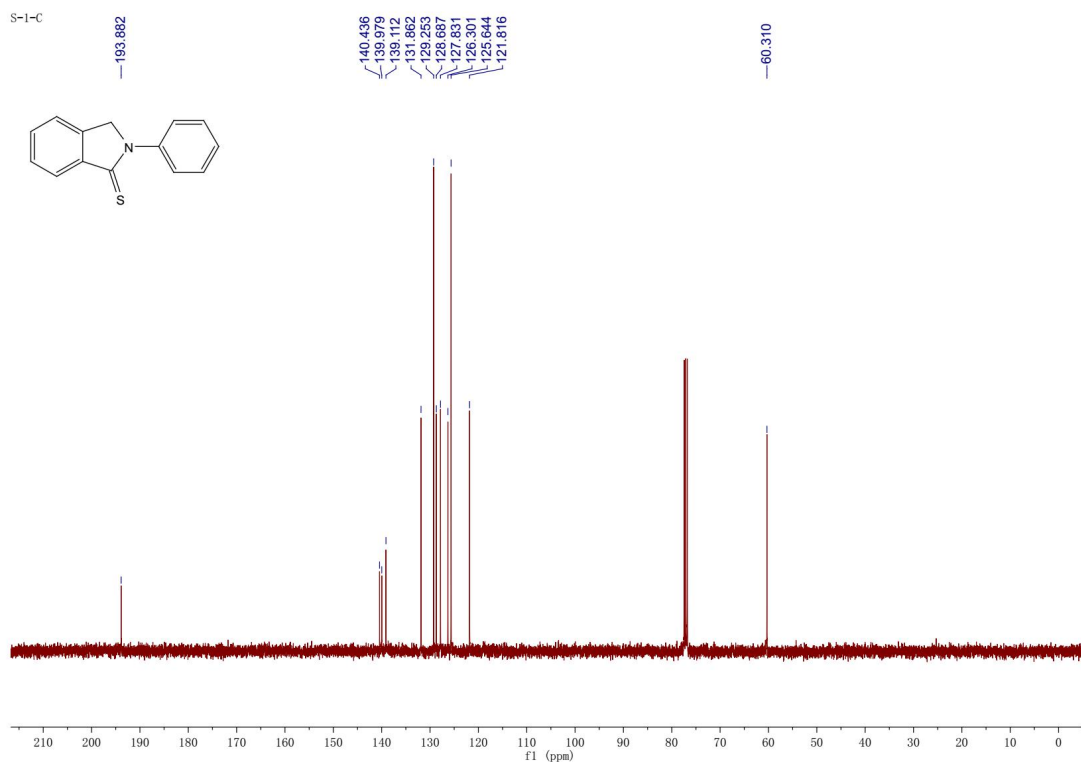

# NMR of 2c

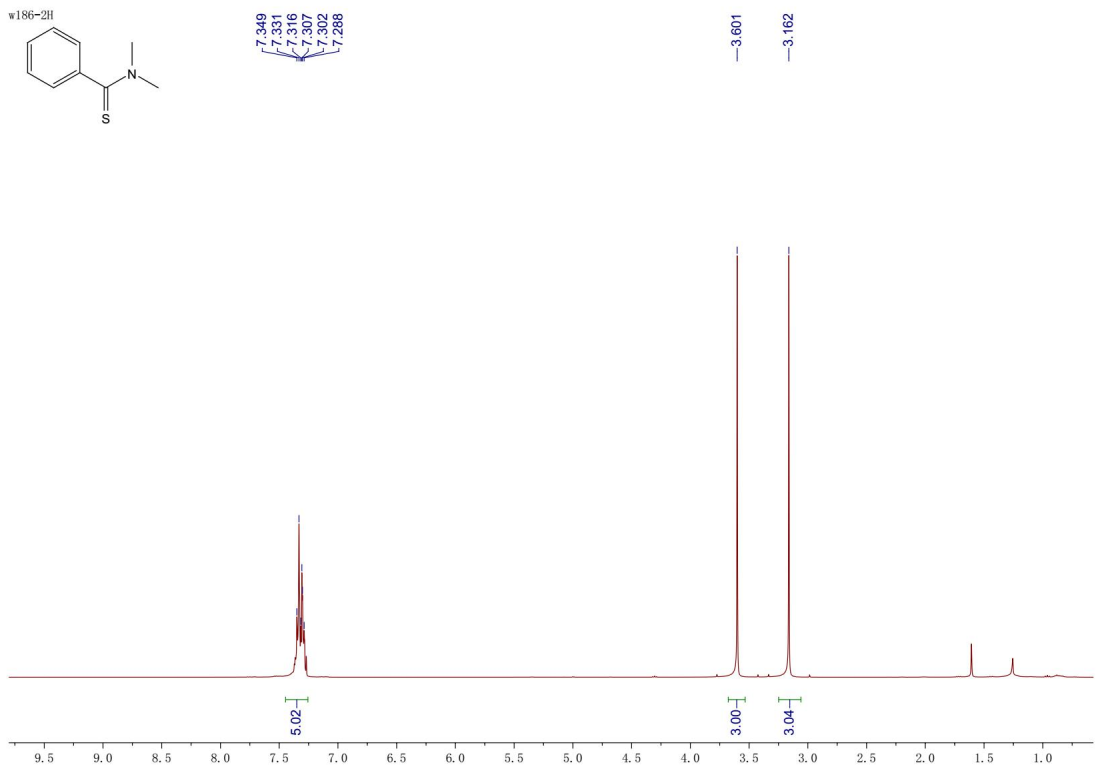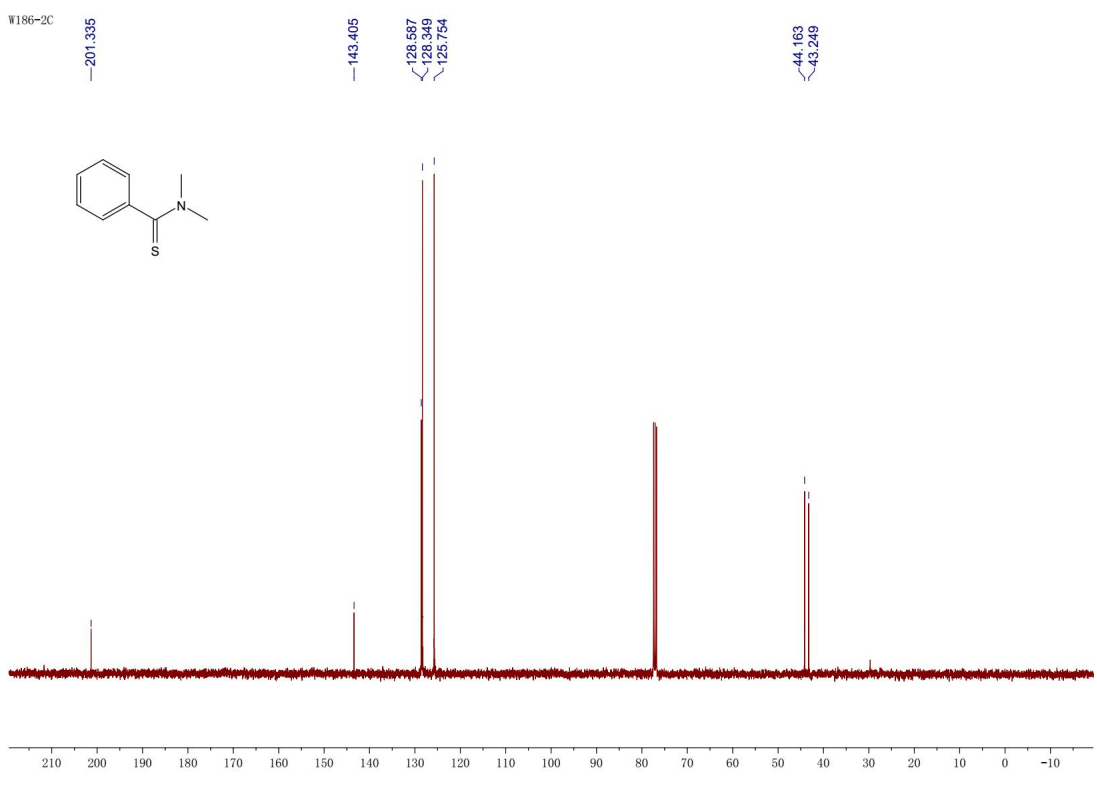



# NMR of 2aa

W191-H

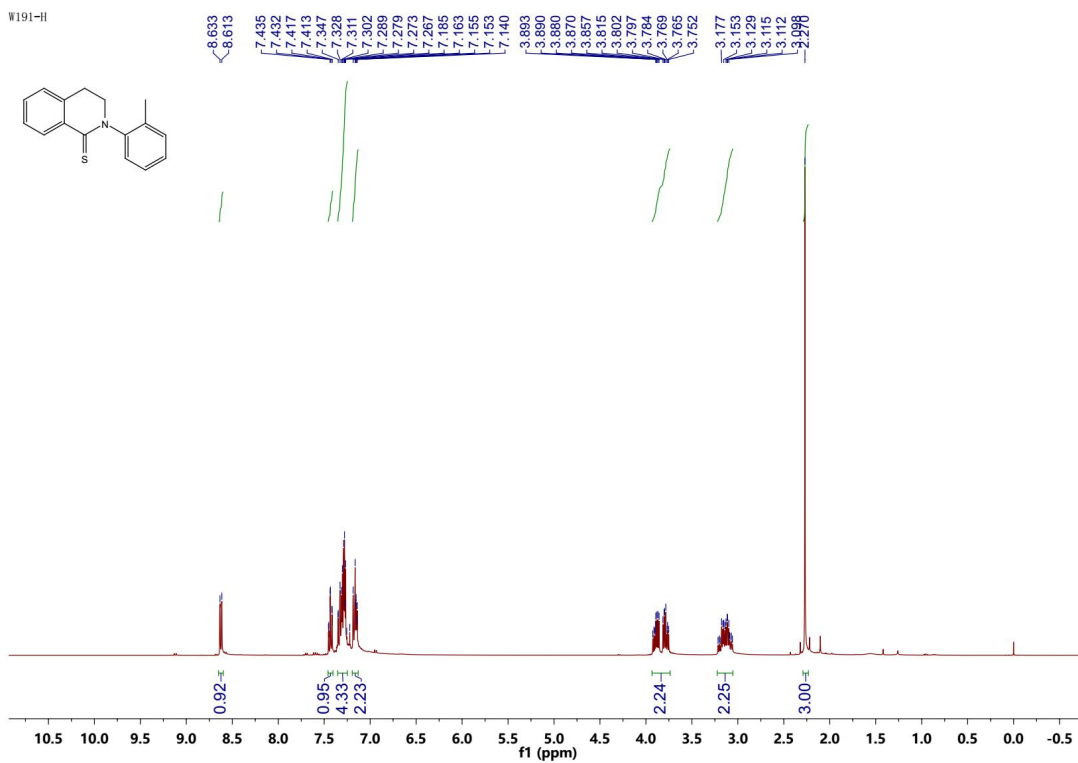

W191-C

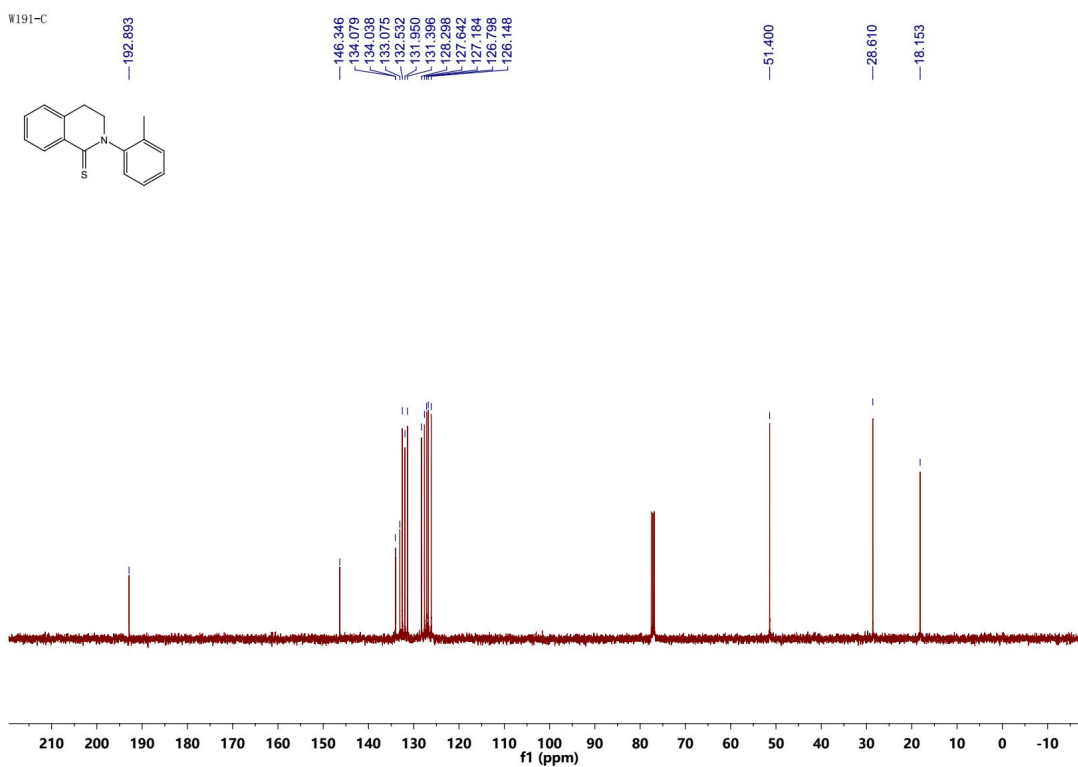

# NMR of 2ab

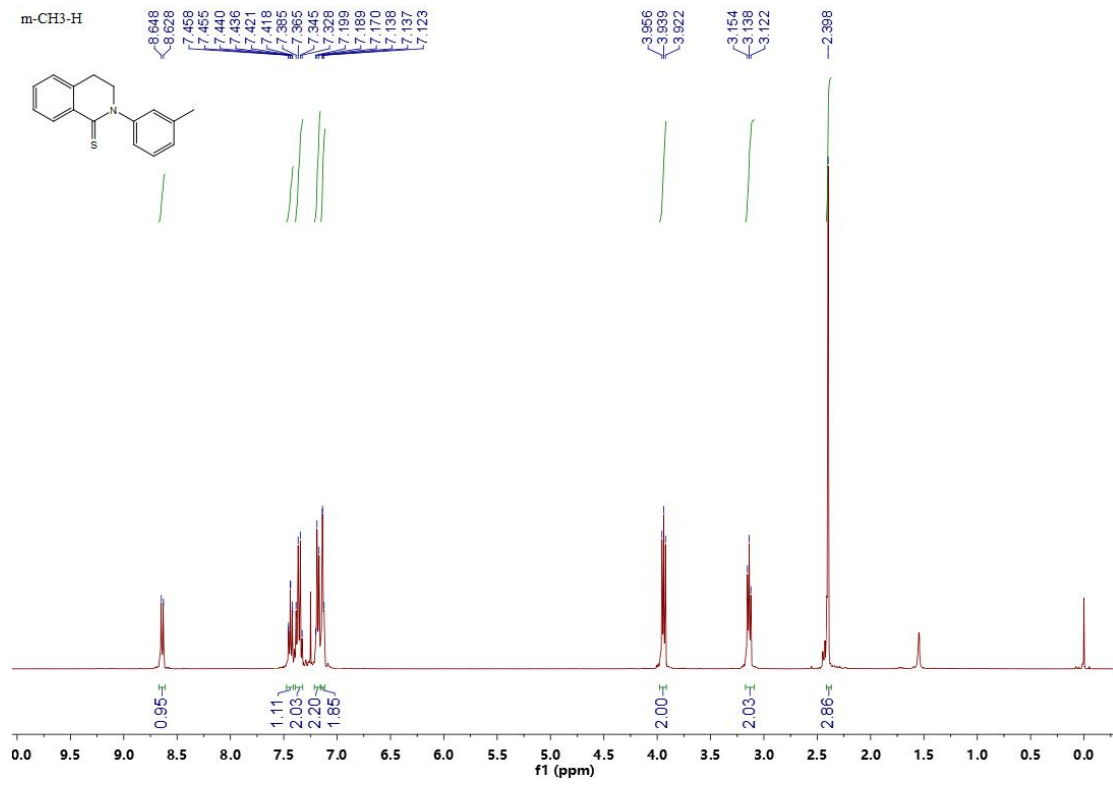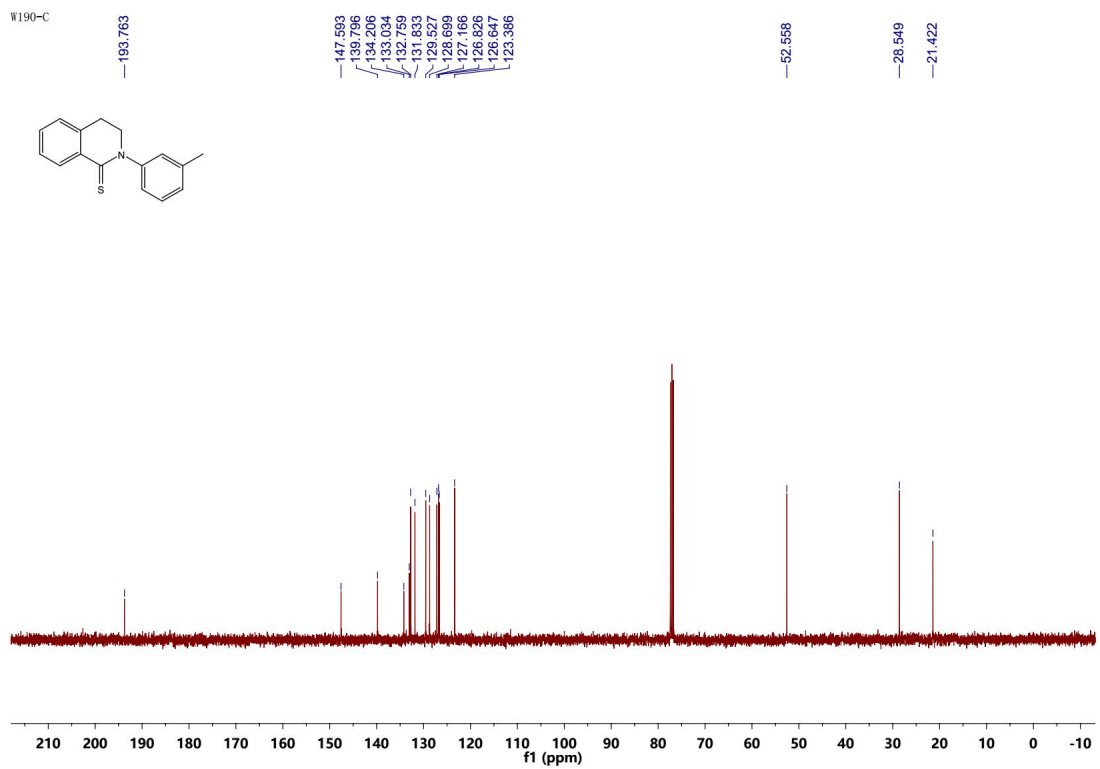

# NMR of 2ac

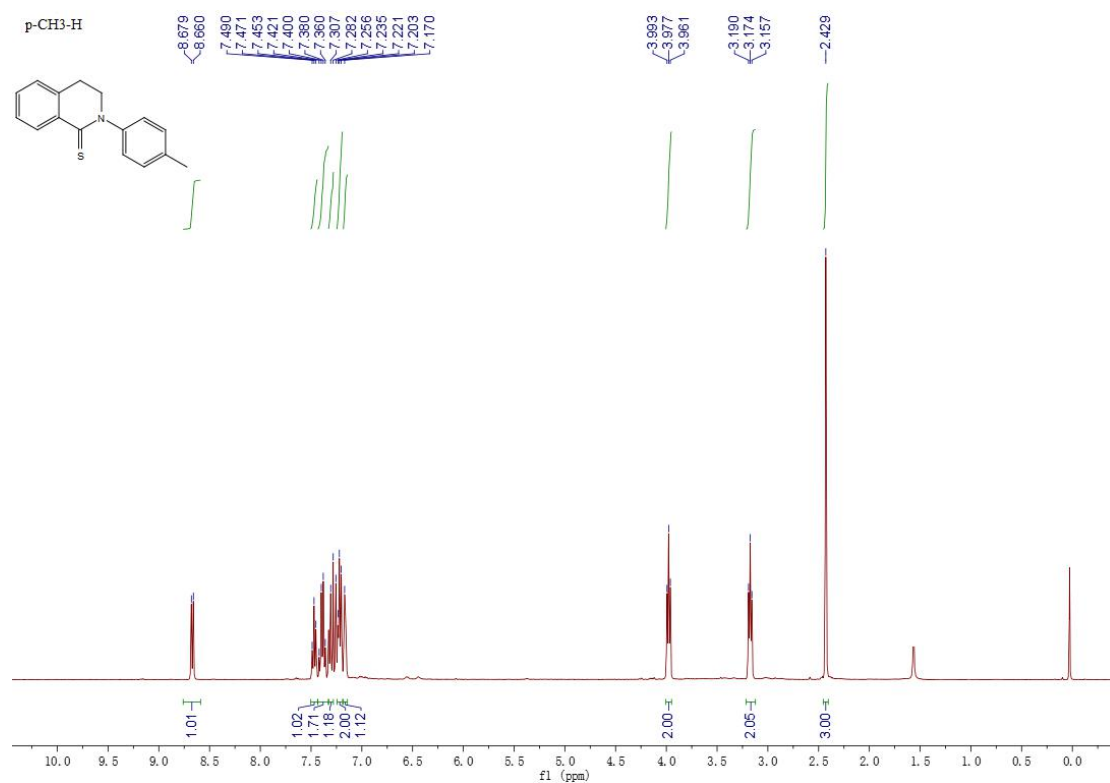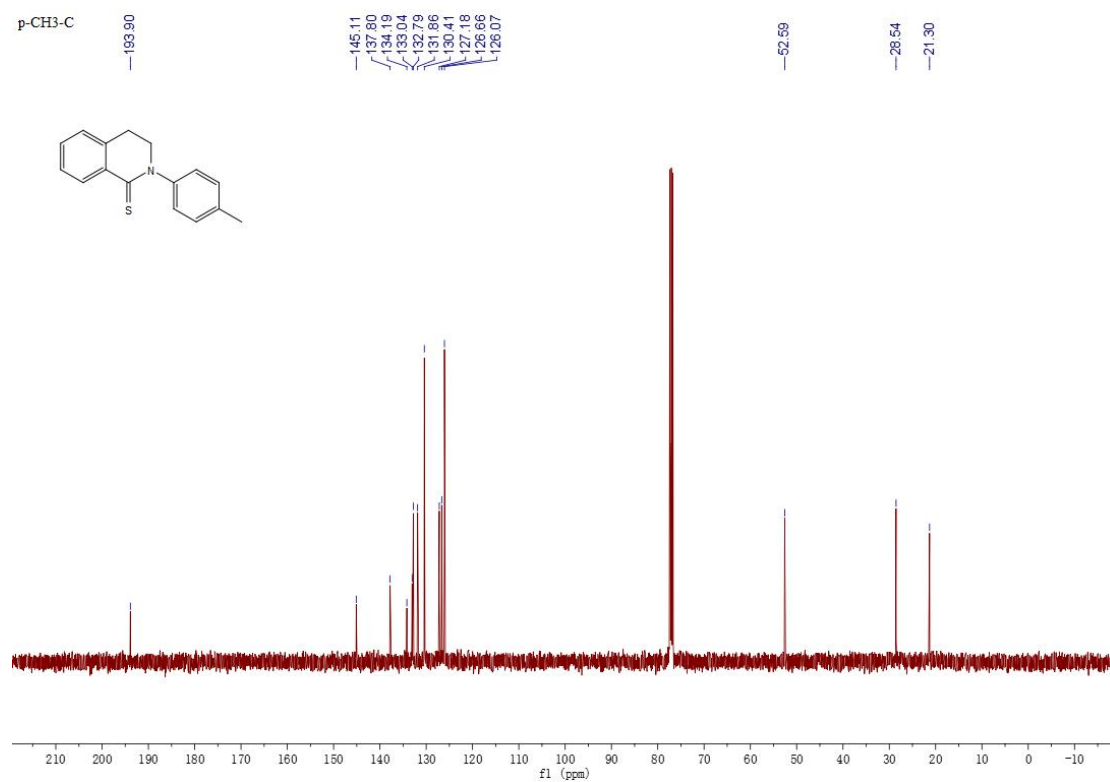

# NMR of 2ad

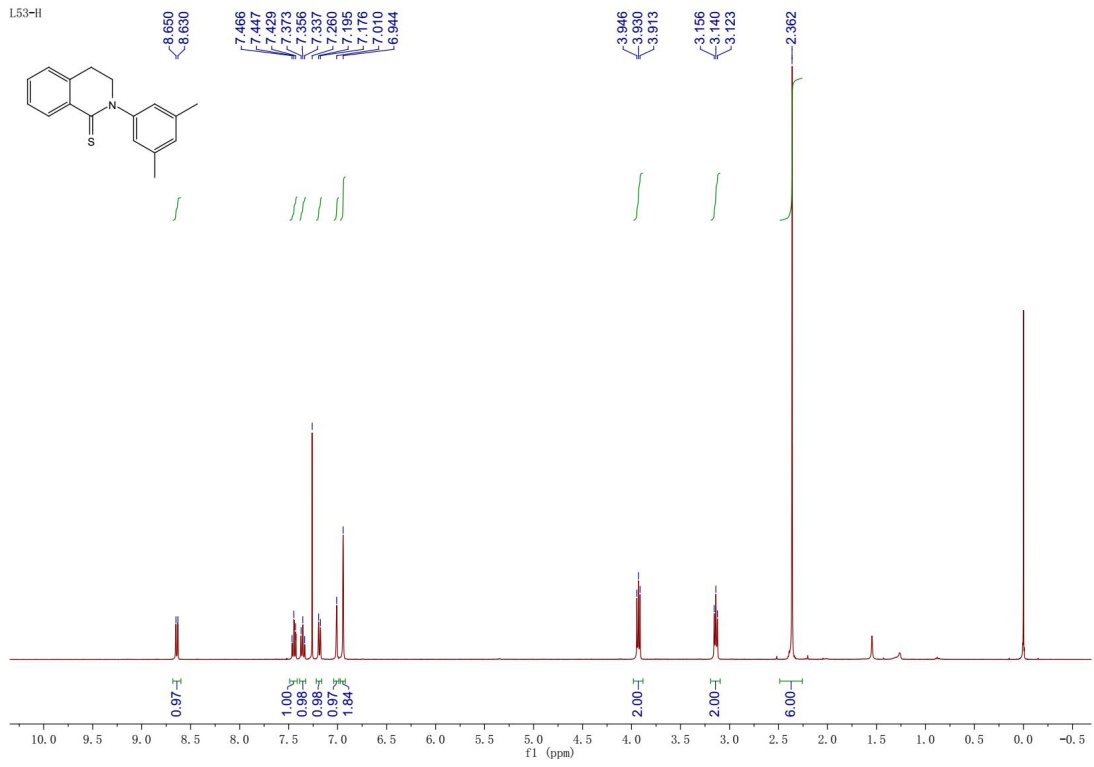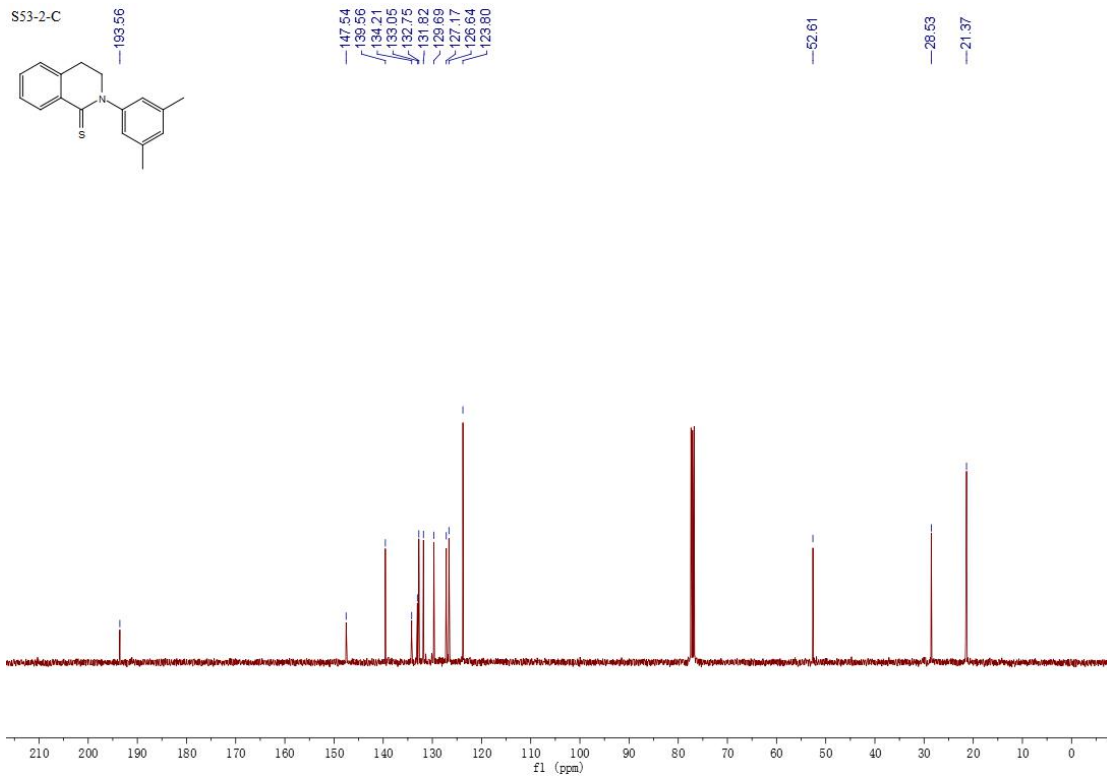

# NMR of 2ae

w187-H

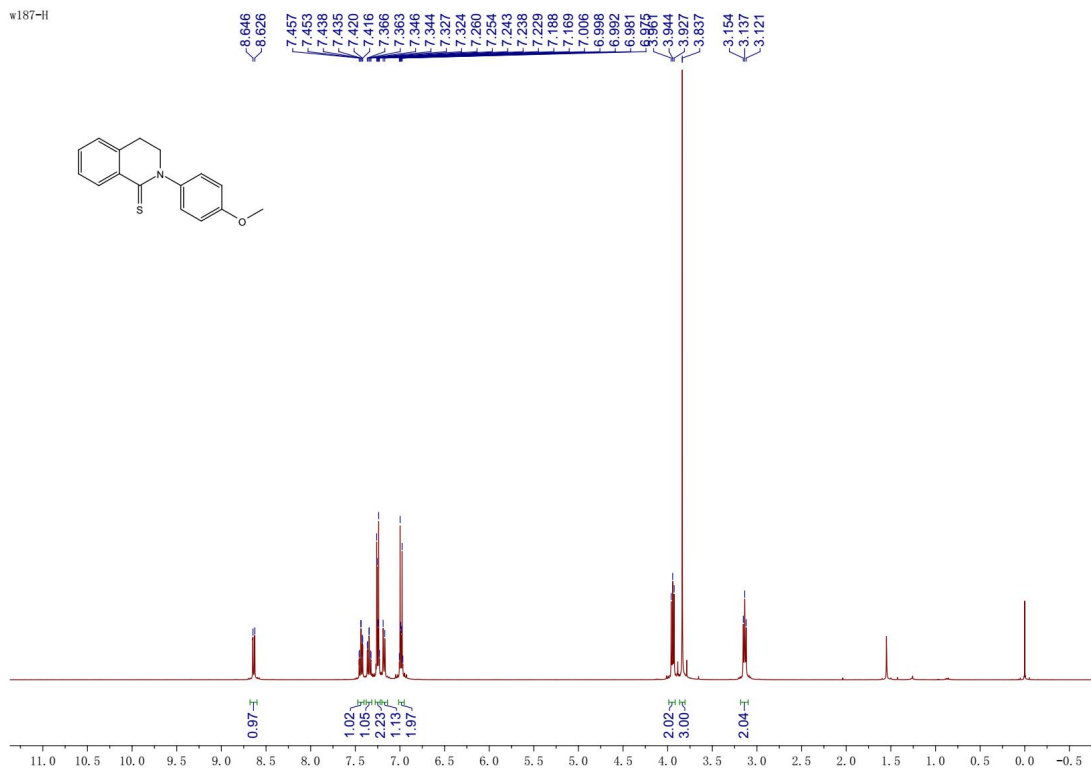

w187-C

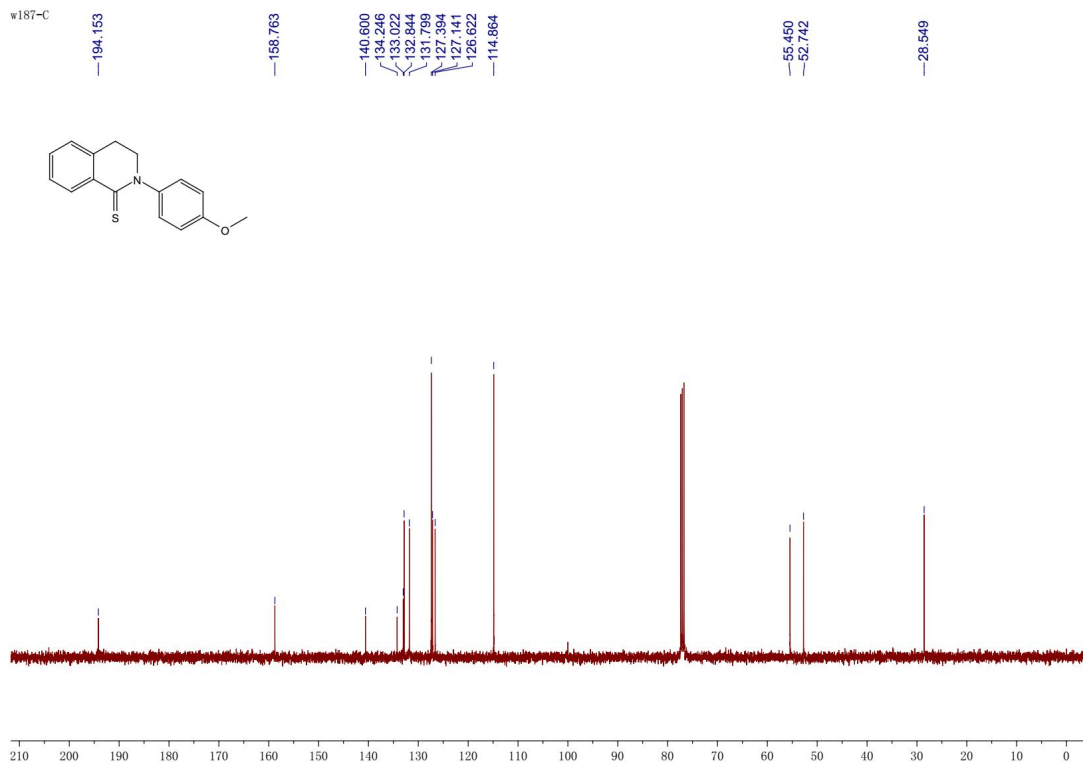

# NMR of 2af

L60-H

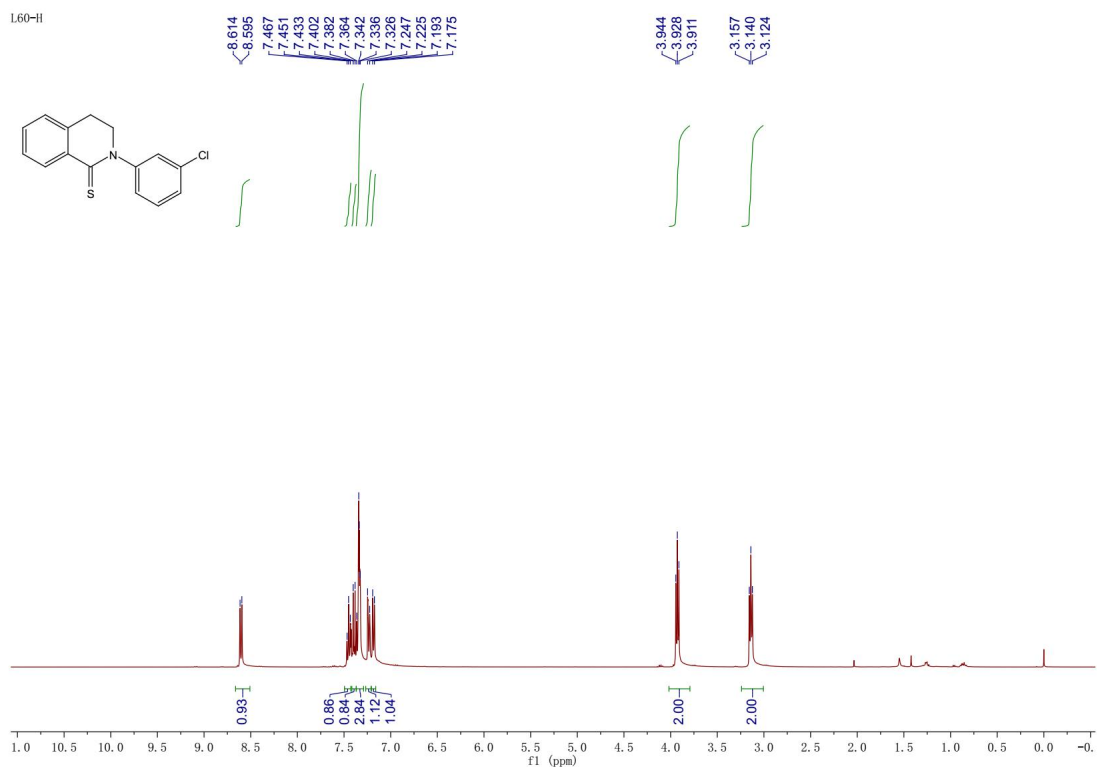

L60-C

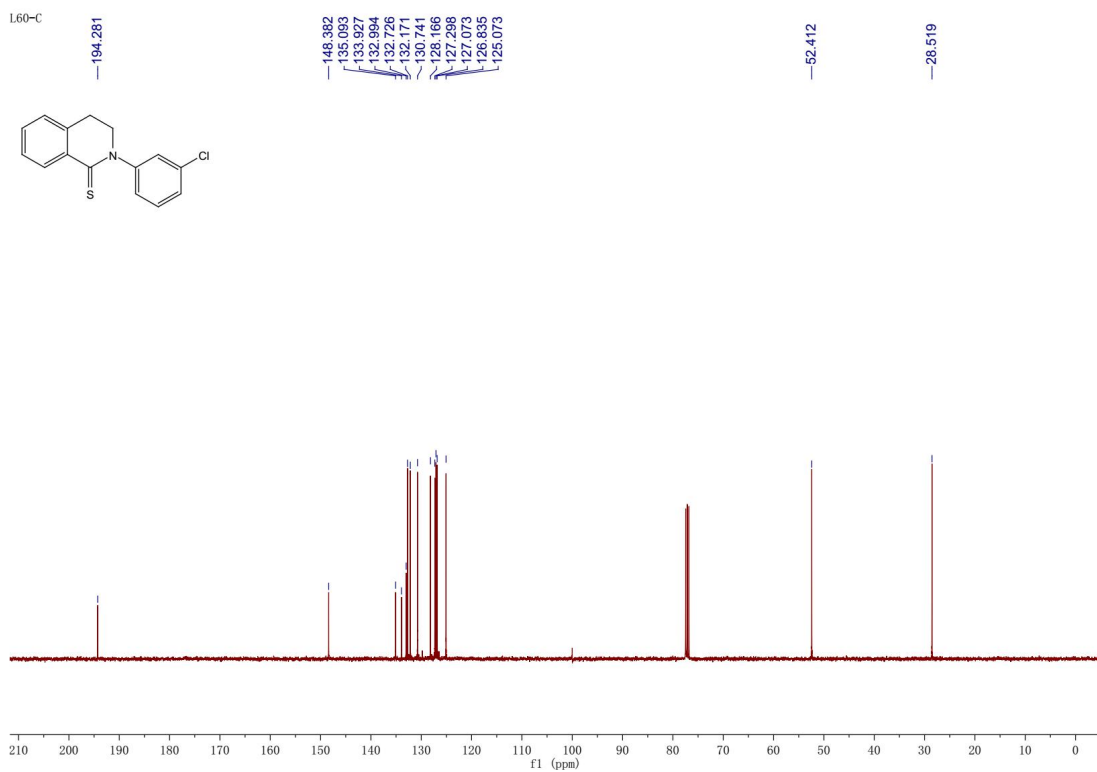

# NMR of 2ag

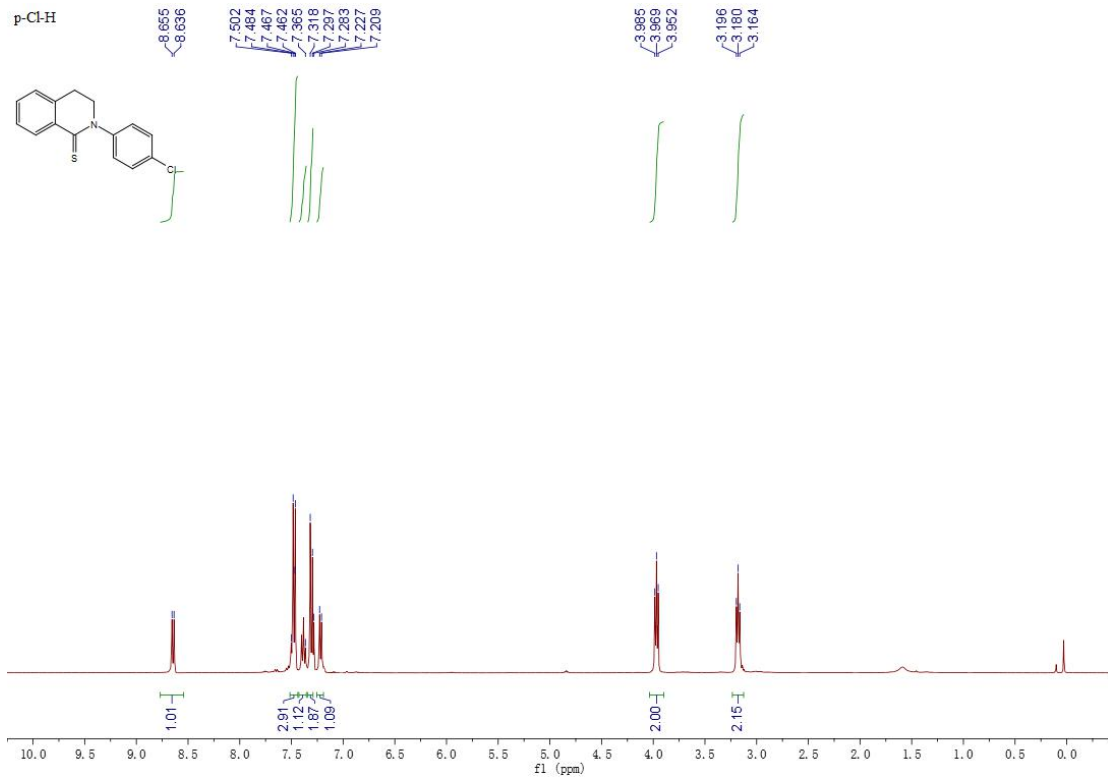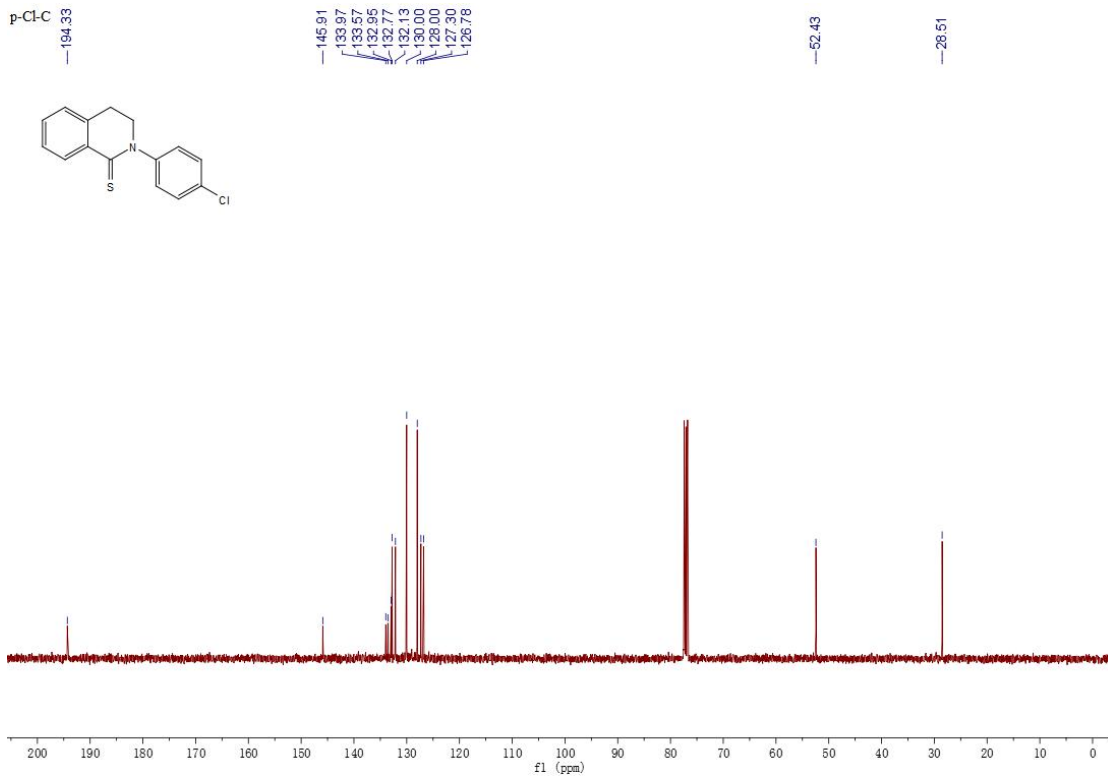

# NMR of 2ah

3-Br-H-1230-

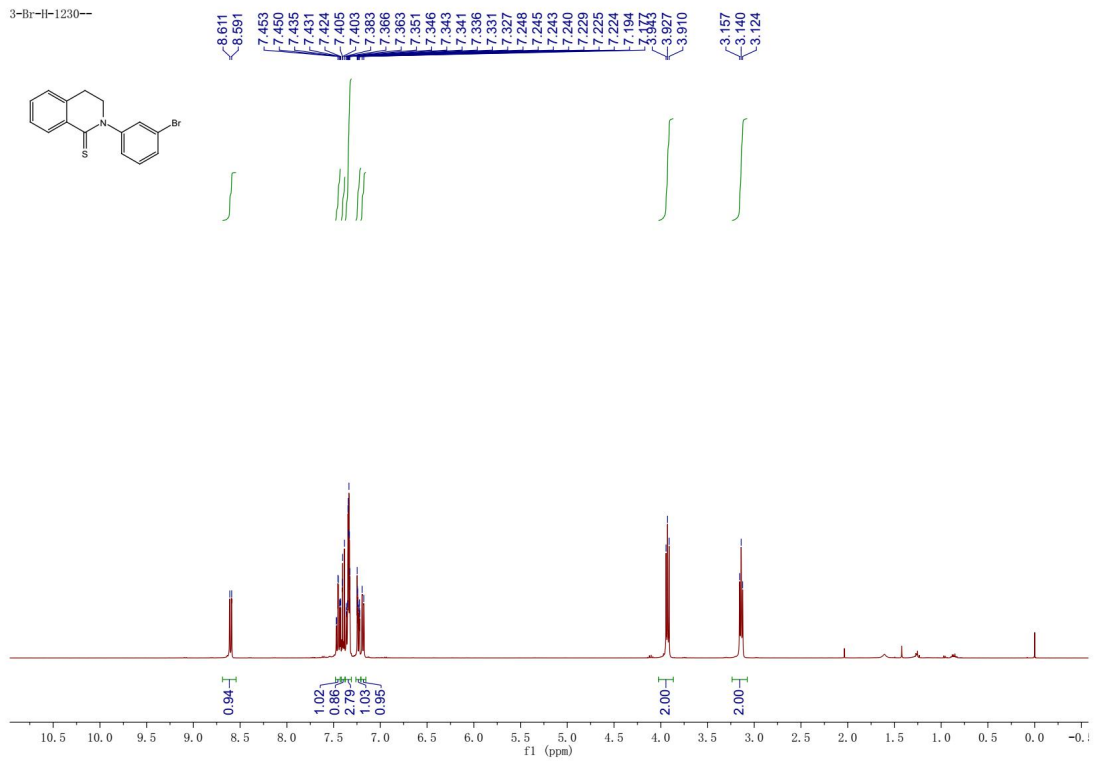

3-Br-C

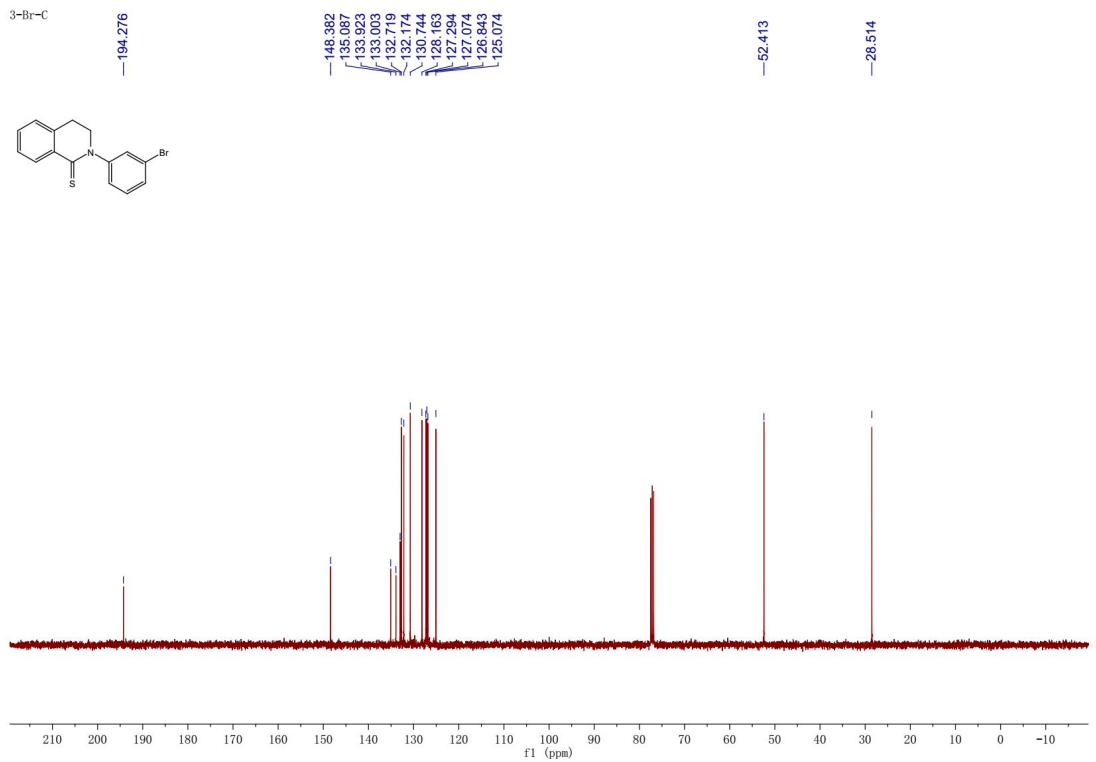



# NMR of 2ai

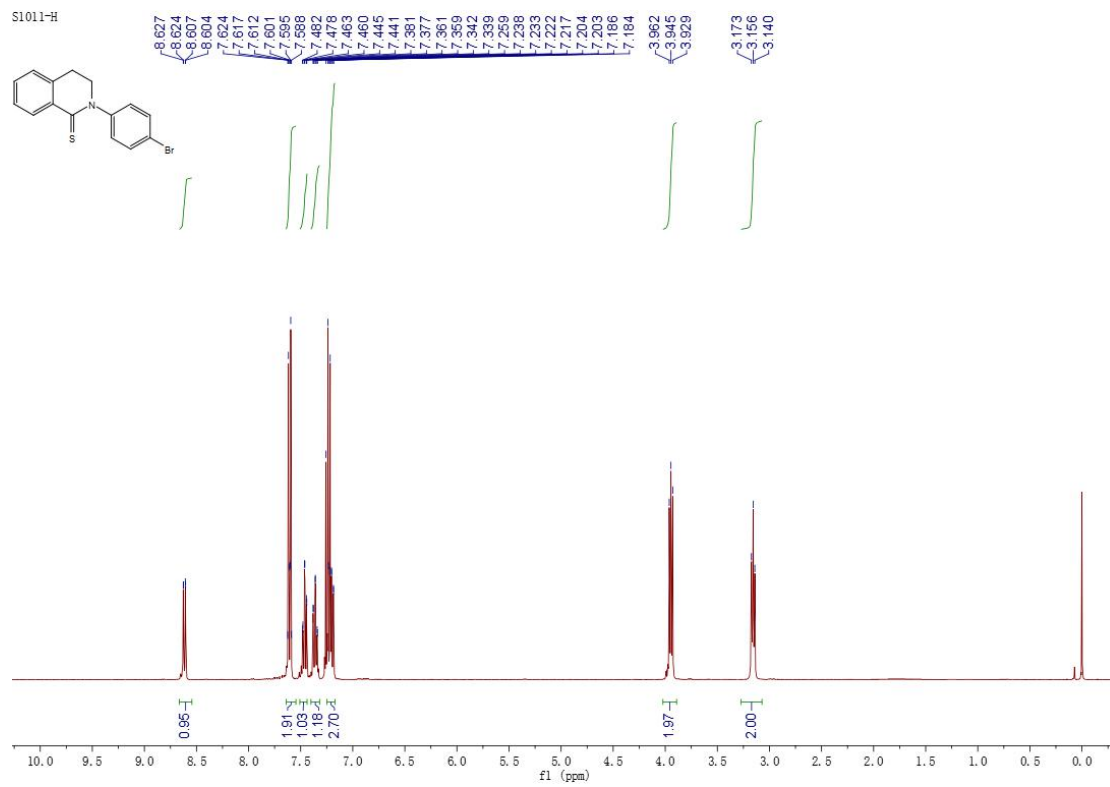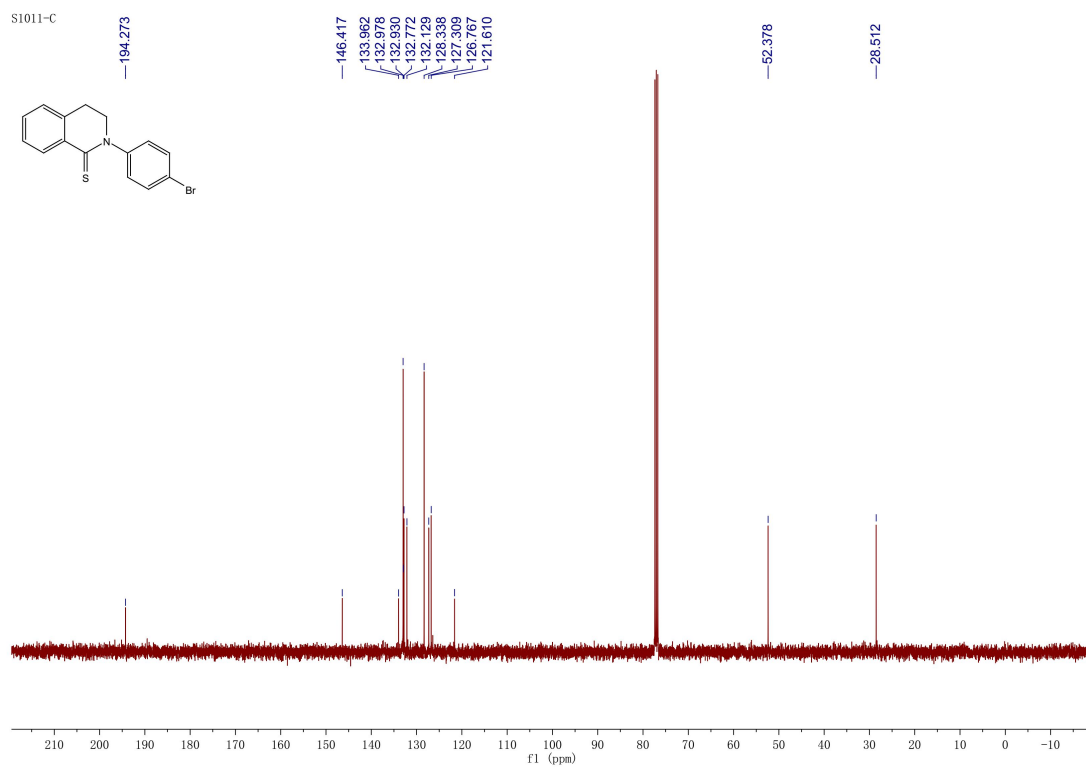

# NMR of 2aj

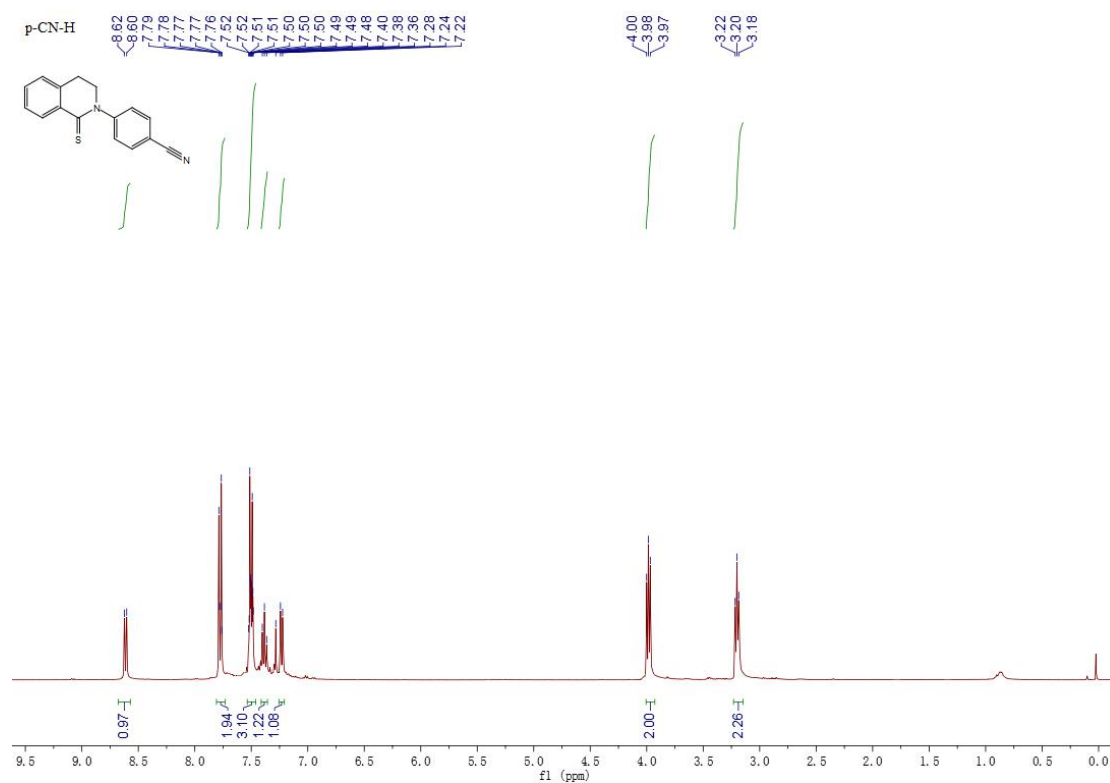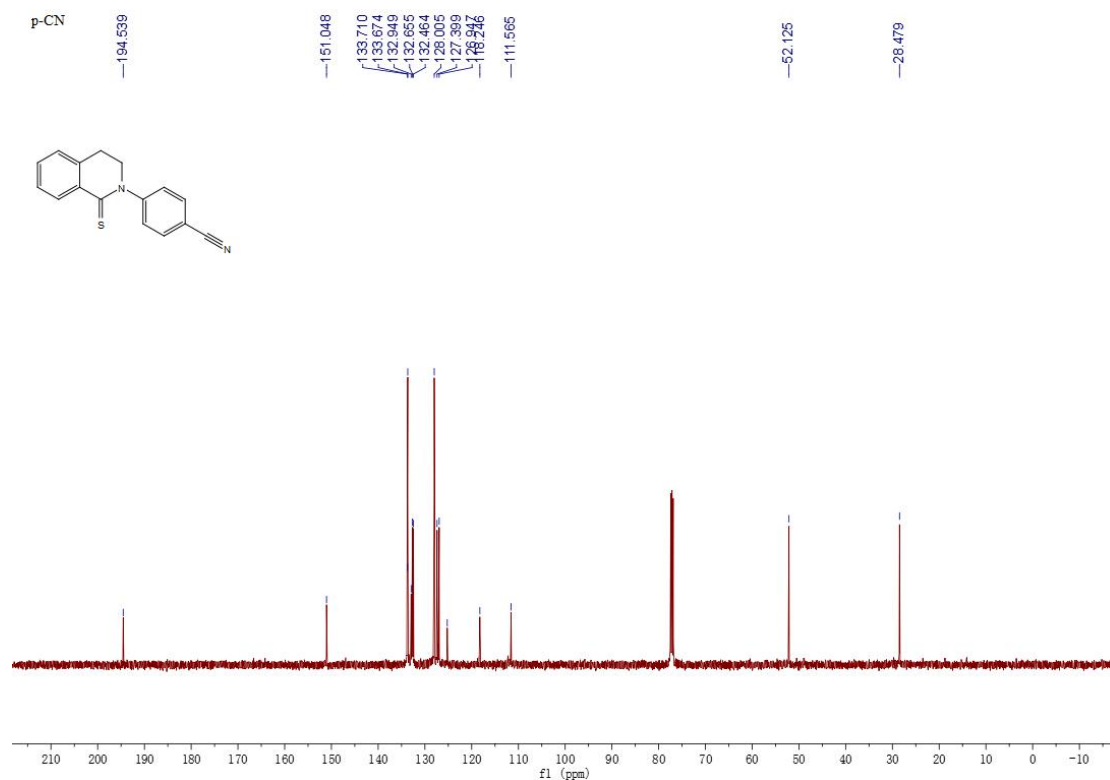

# NMR of 2ak

L42-H

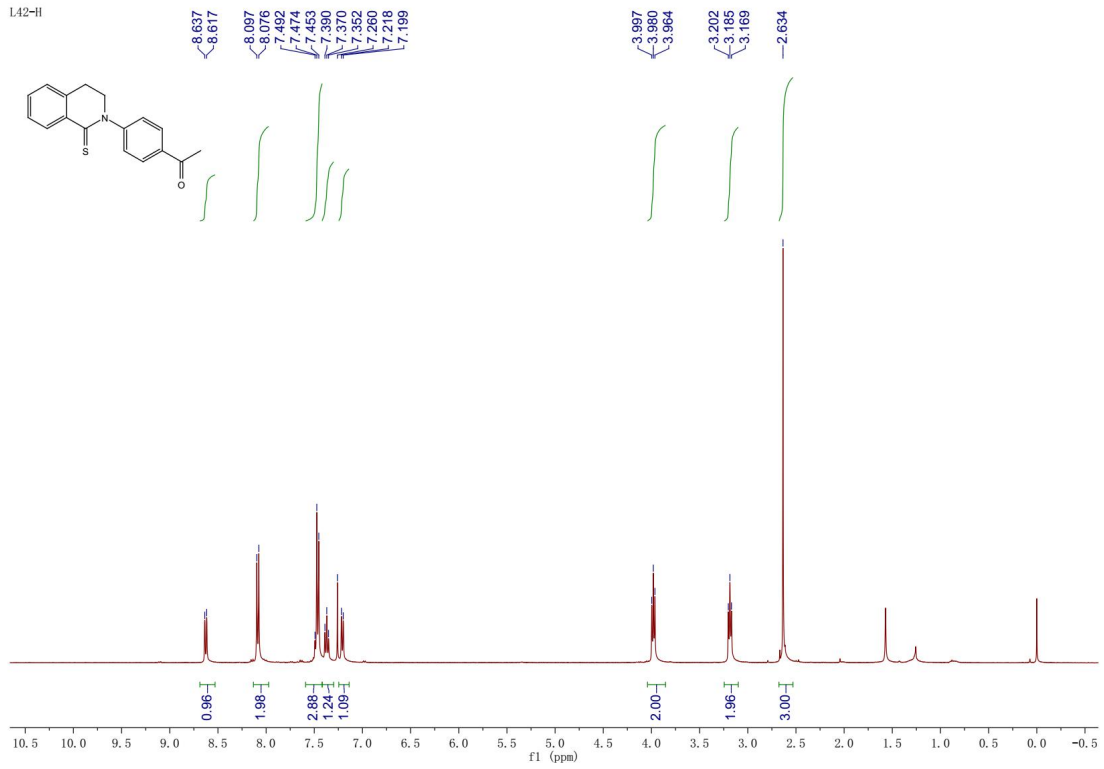

L42-C

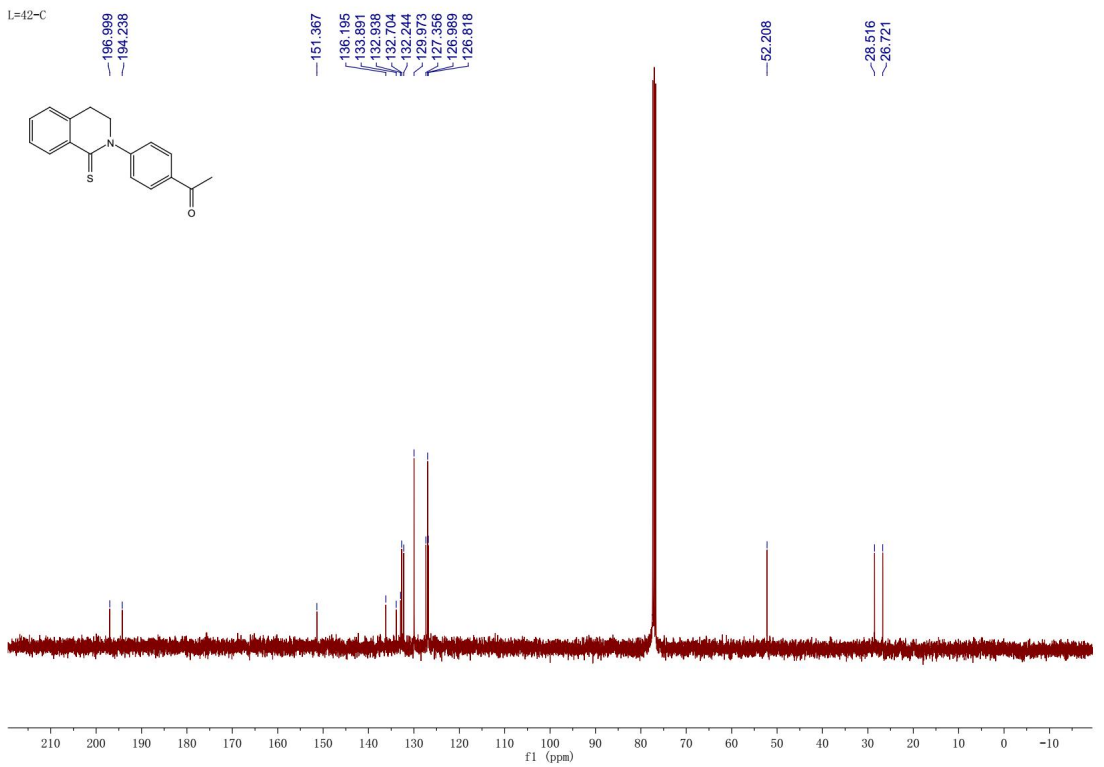

# NMR of 2aI

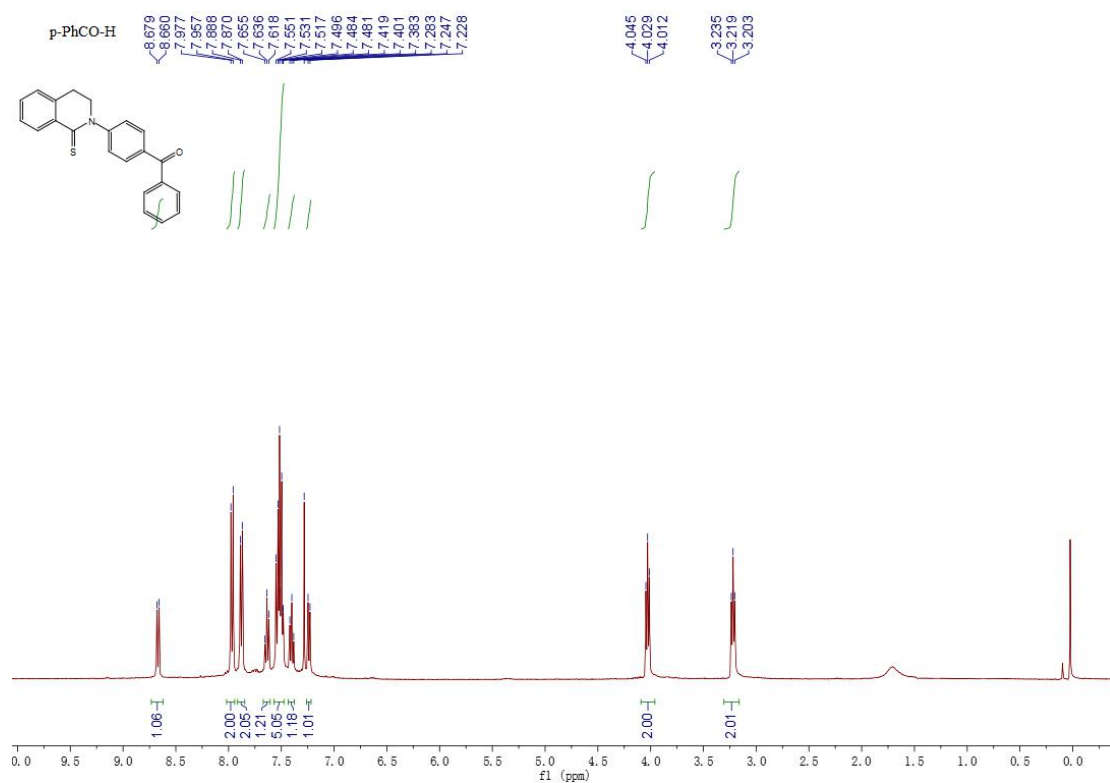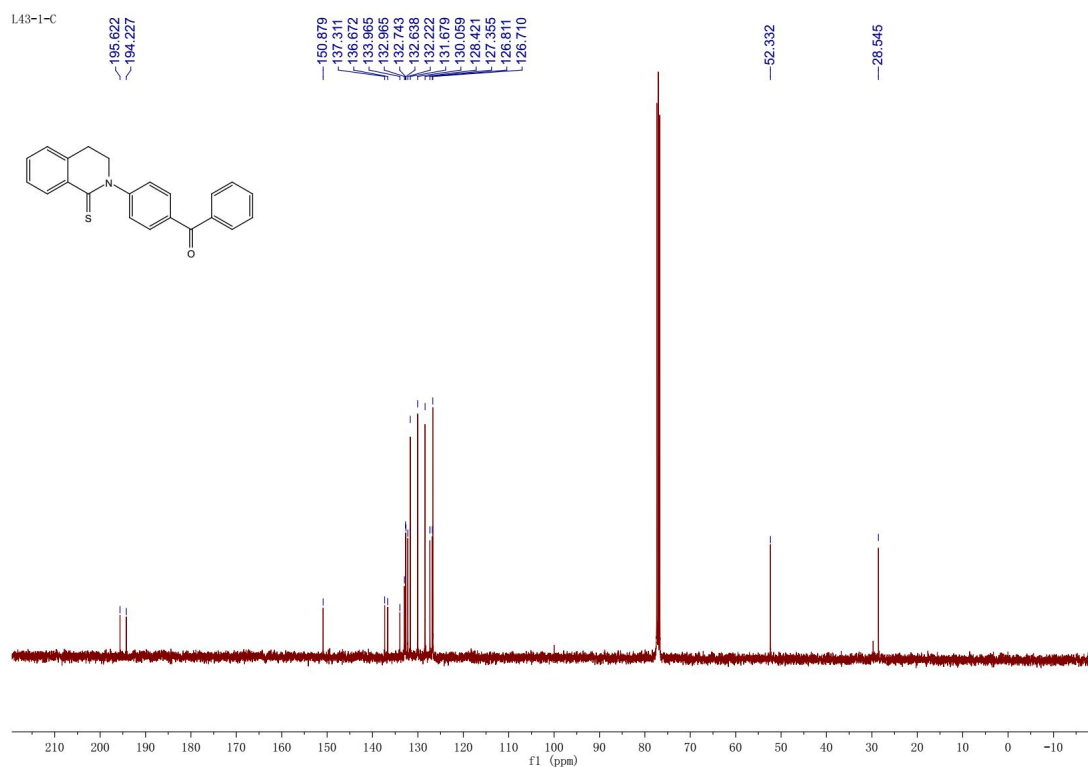

# NMR of 2am

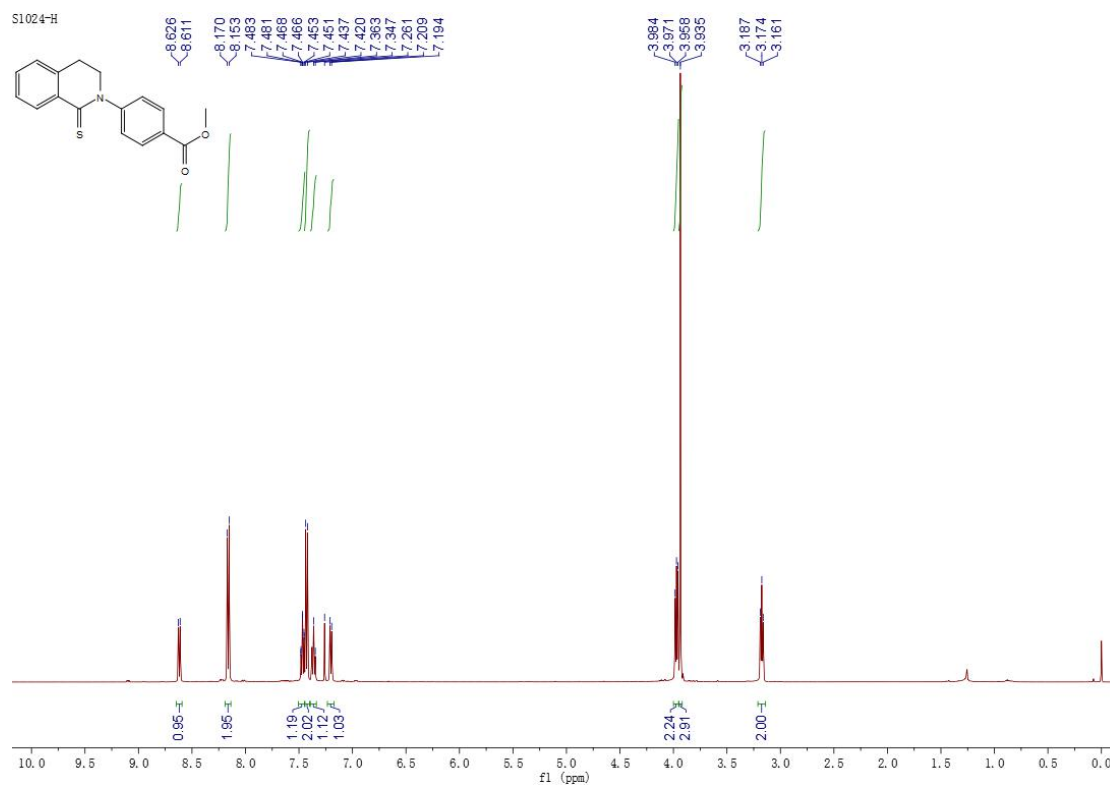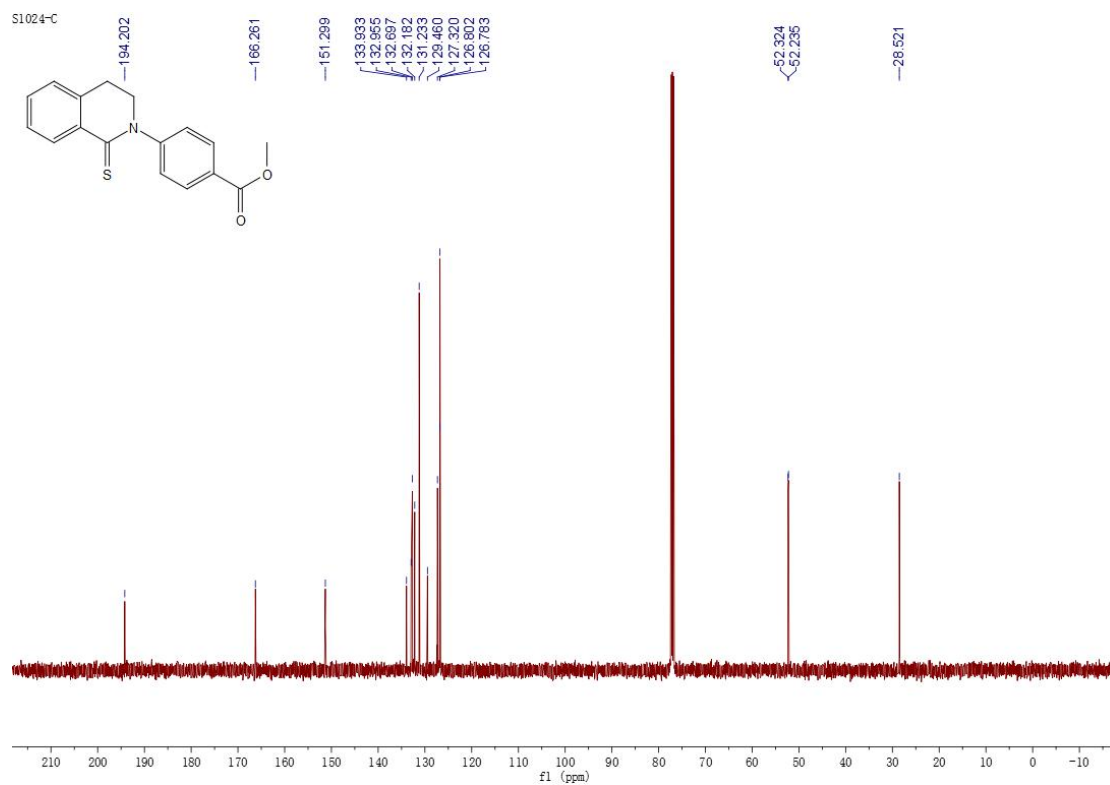

# NMR of 2an

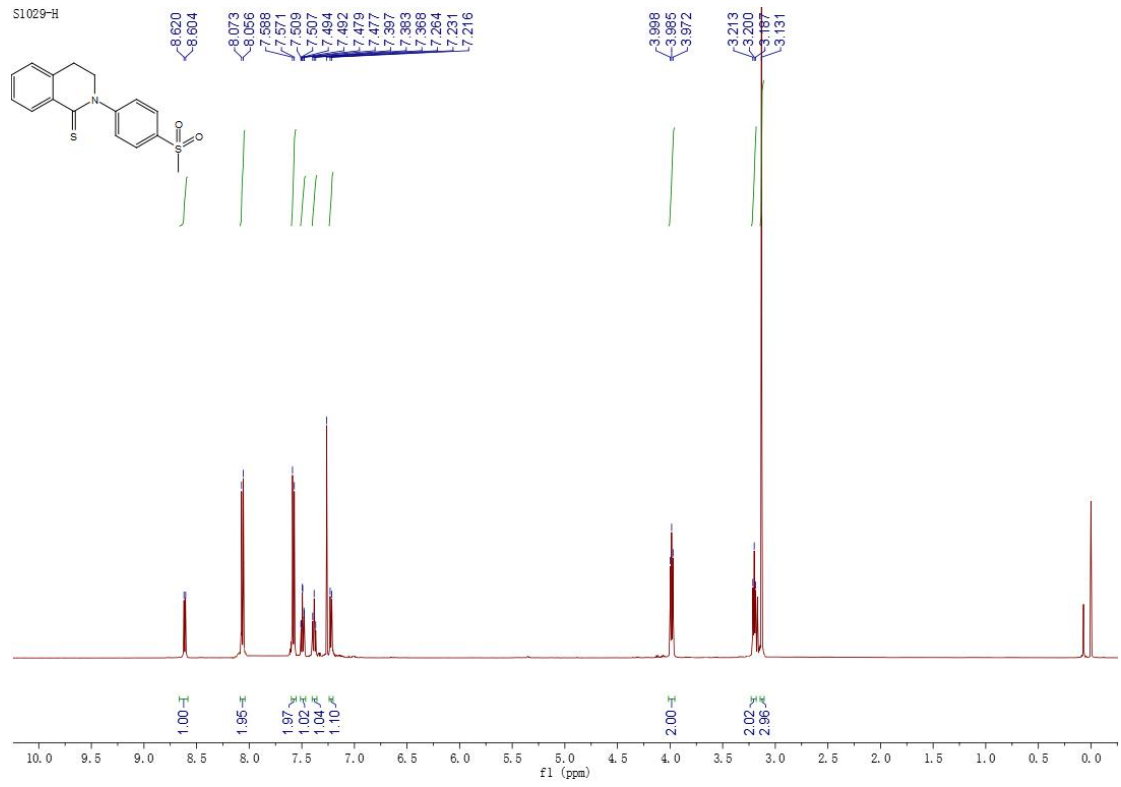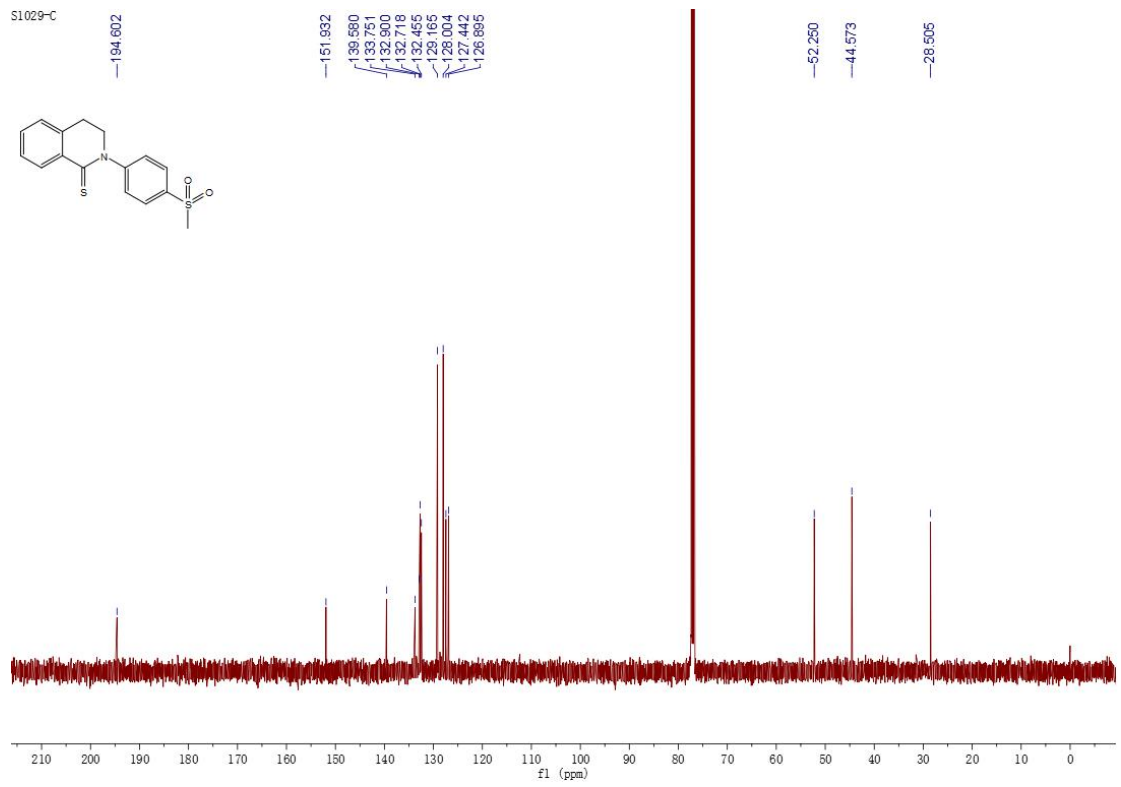

### NMR of 2ao

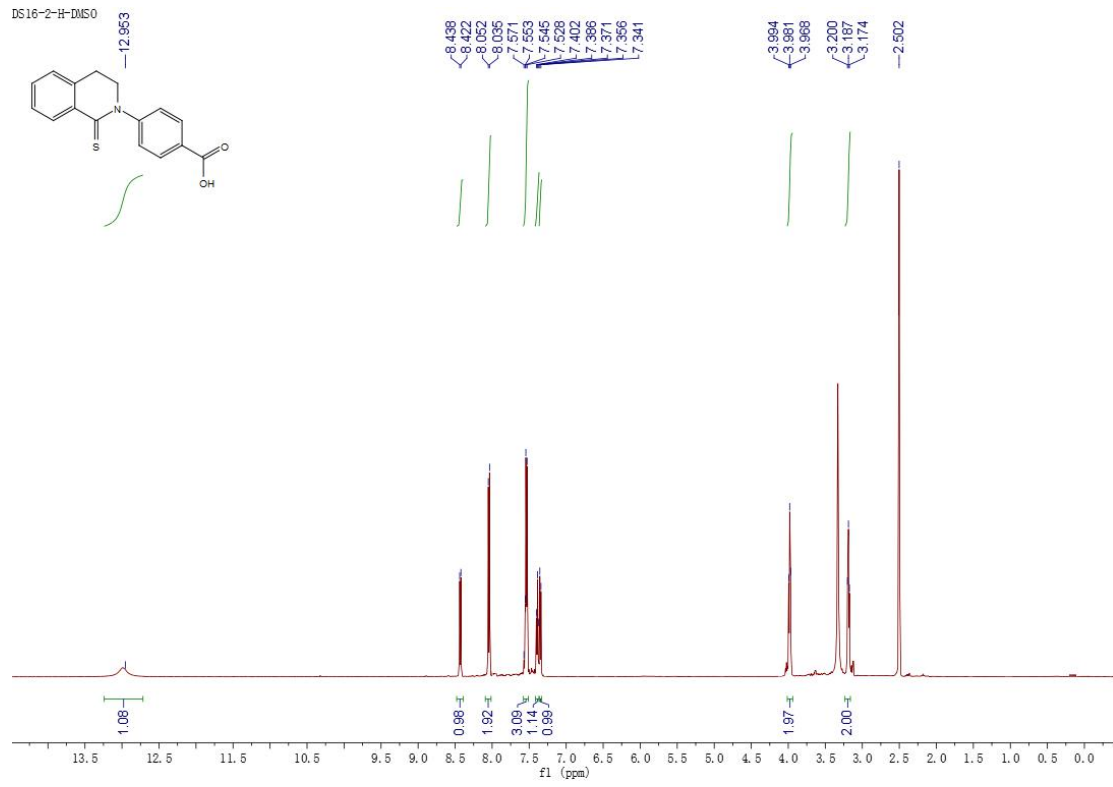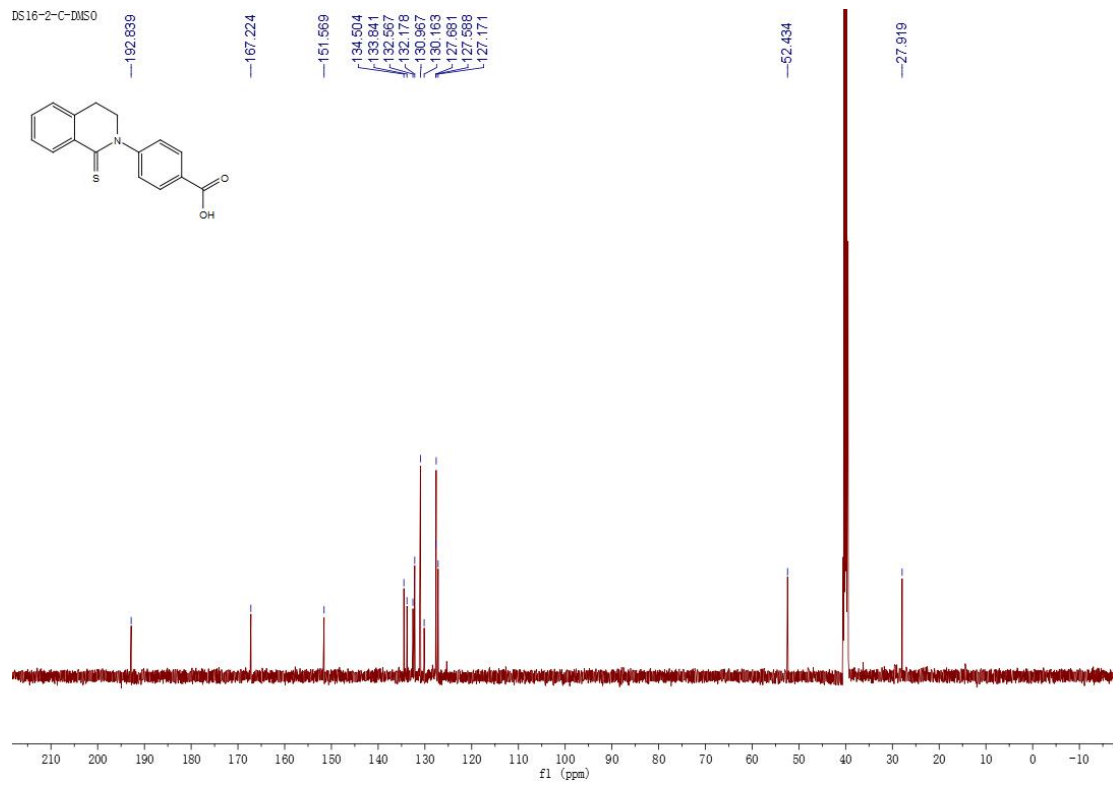

# NMR of 2ap

s1036-1h

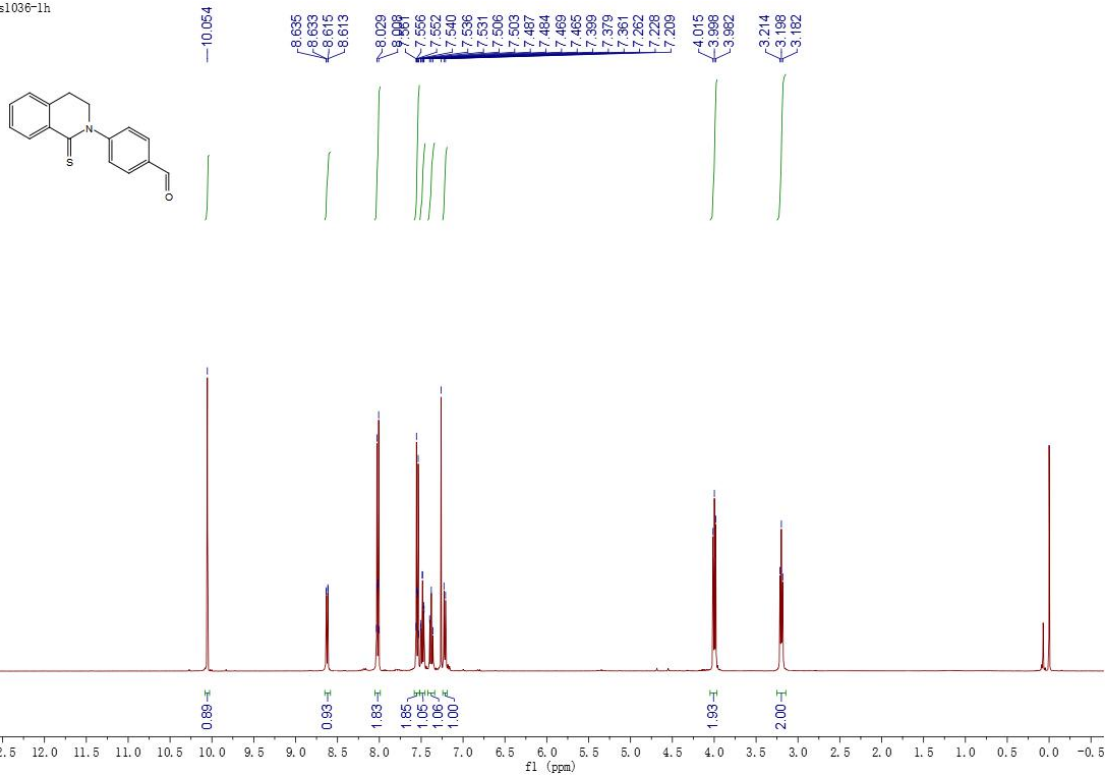

s1036-1c

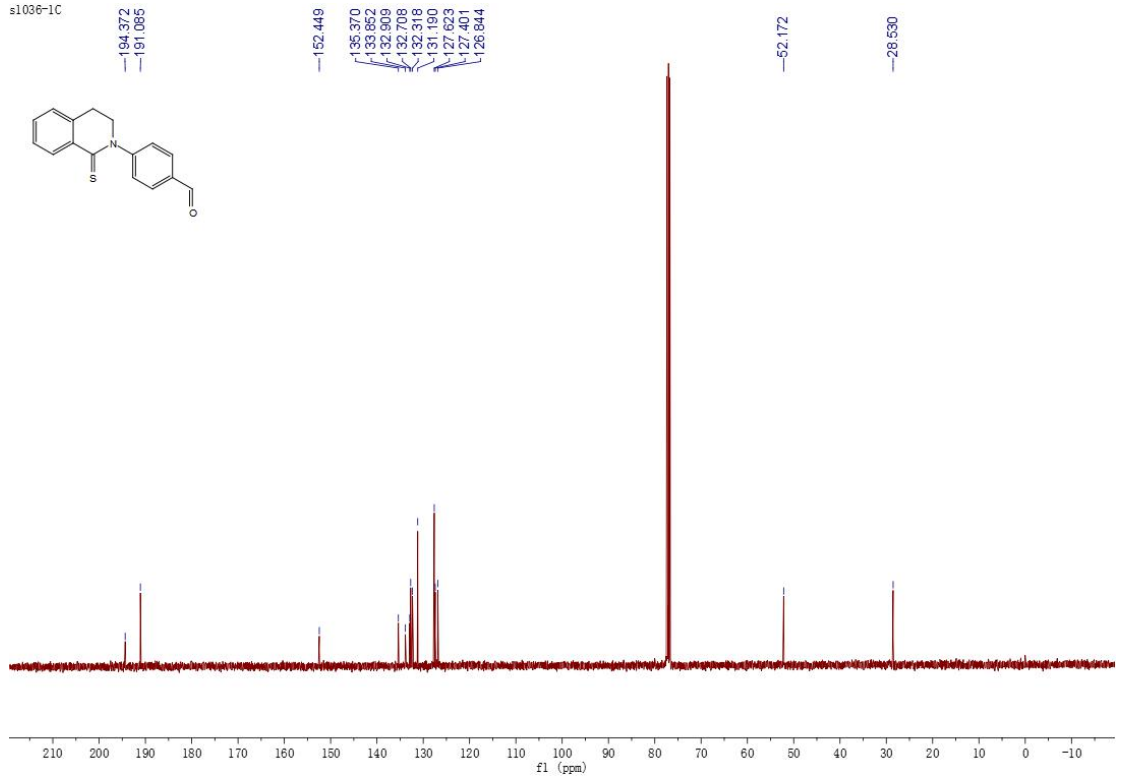



# NMR of 1aq

S1031-H

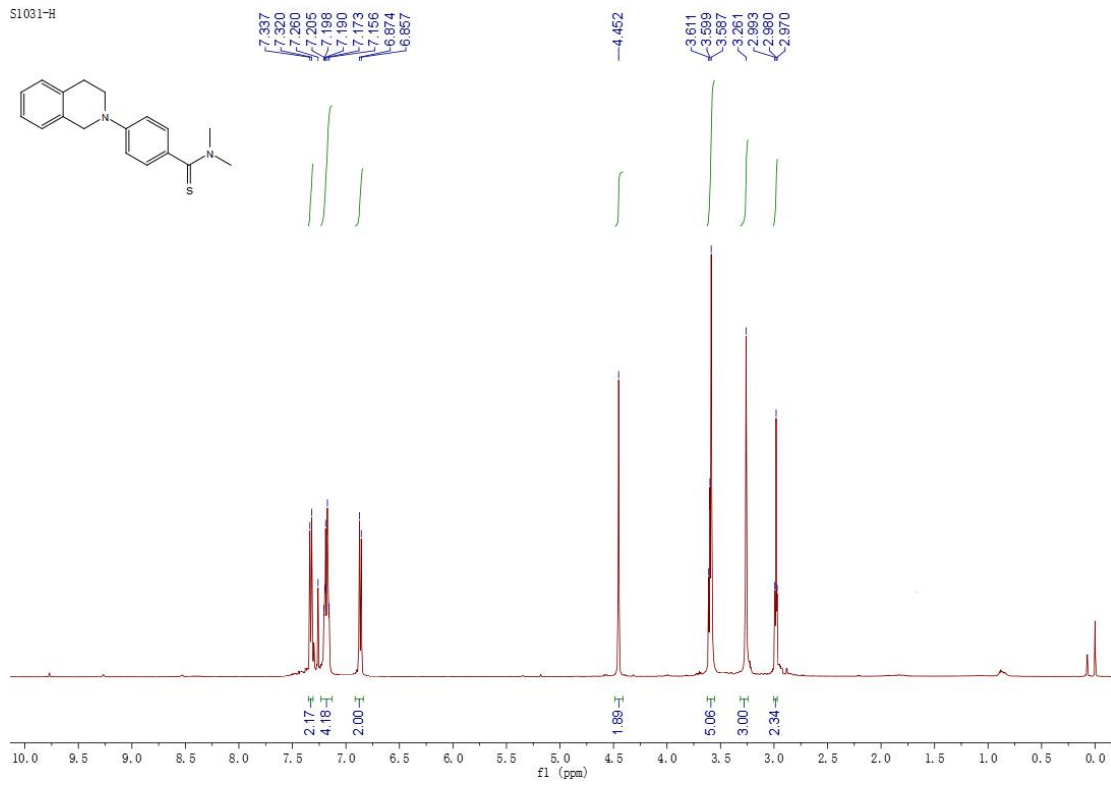

S1031-C

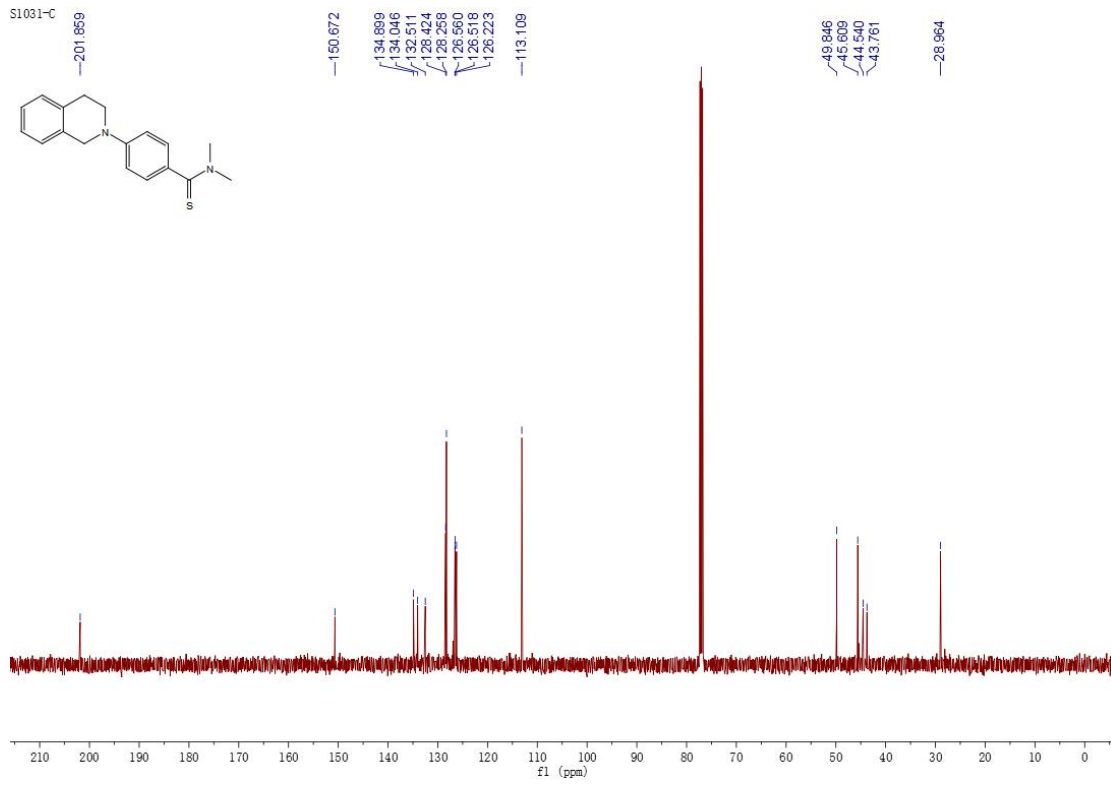

# NMR of 2aq

S1020-1H

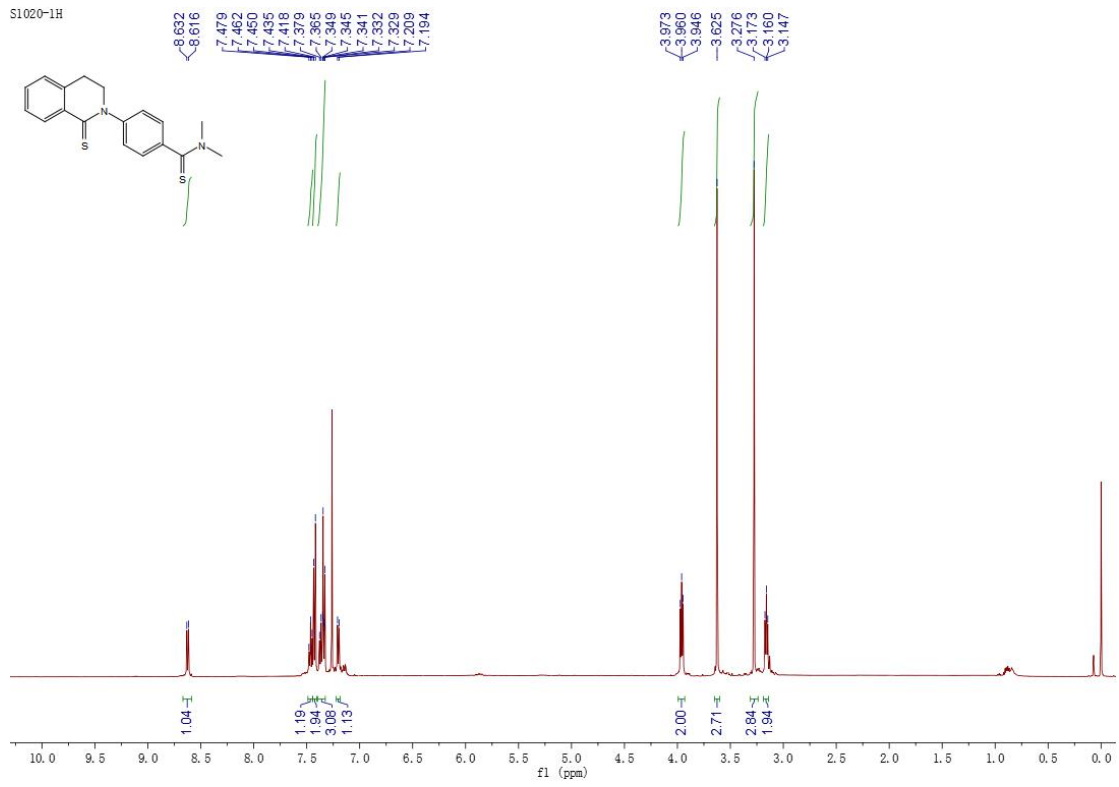

S1020-1C

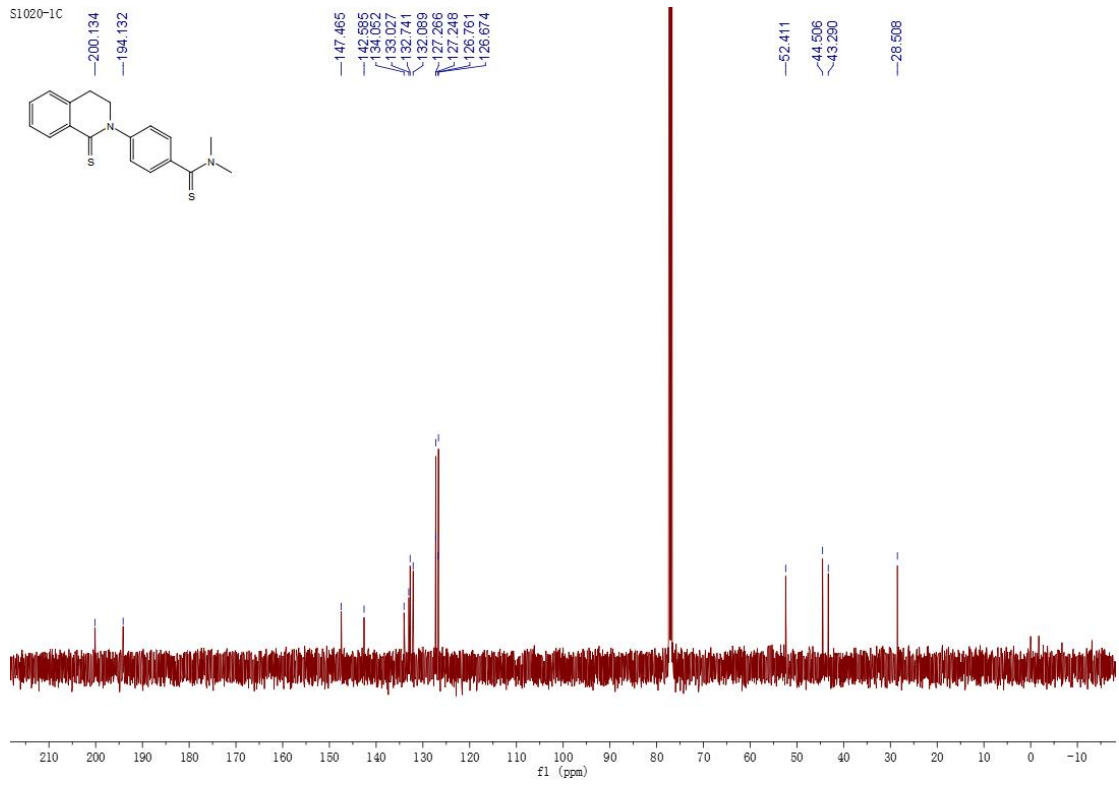

# NMR of 2at

1.65-H

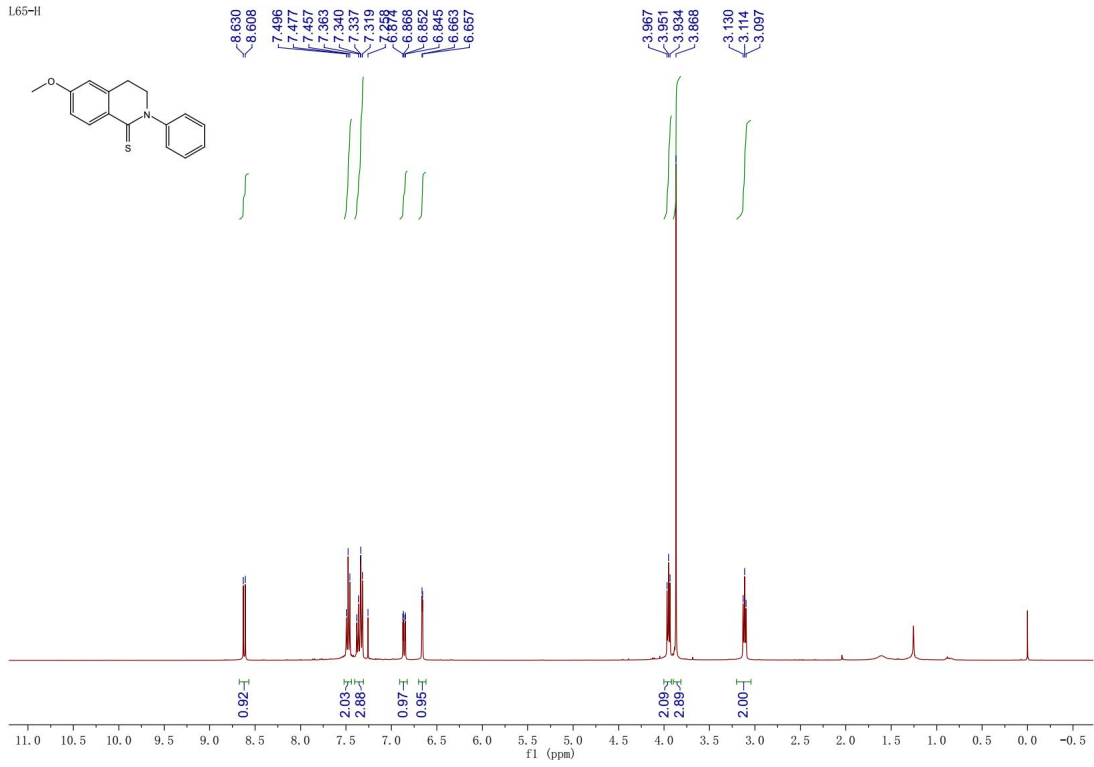

1.65-C

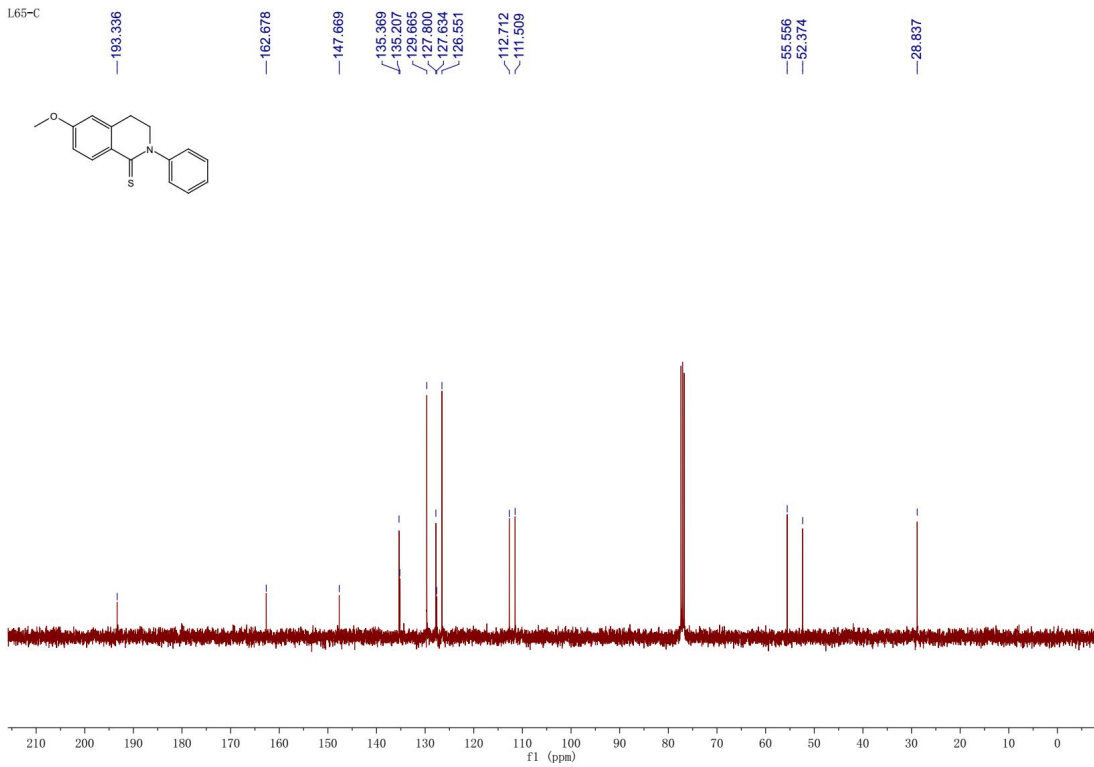

# NMR of 2au

L62-H

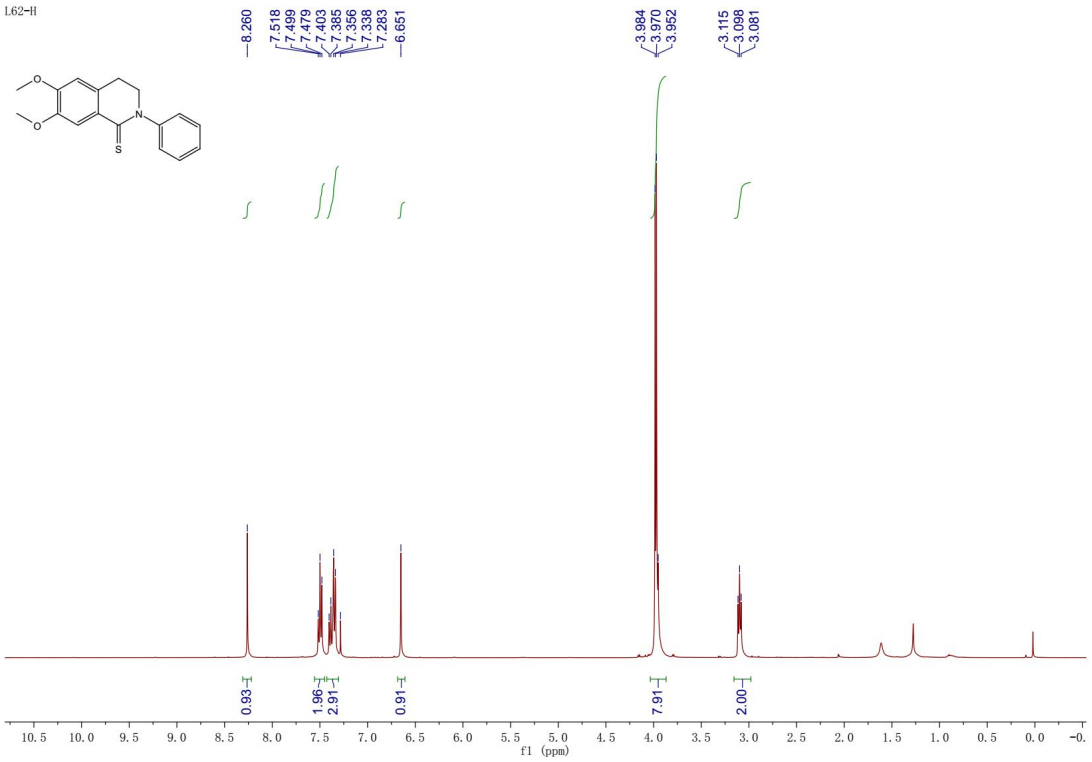

L62-C

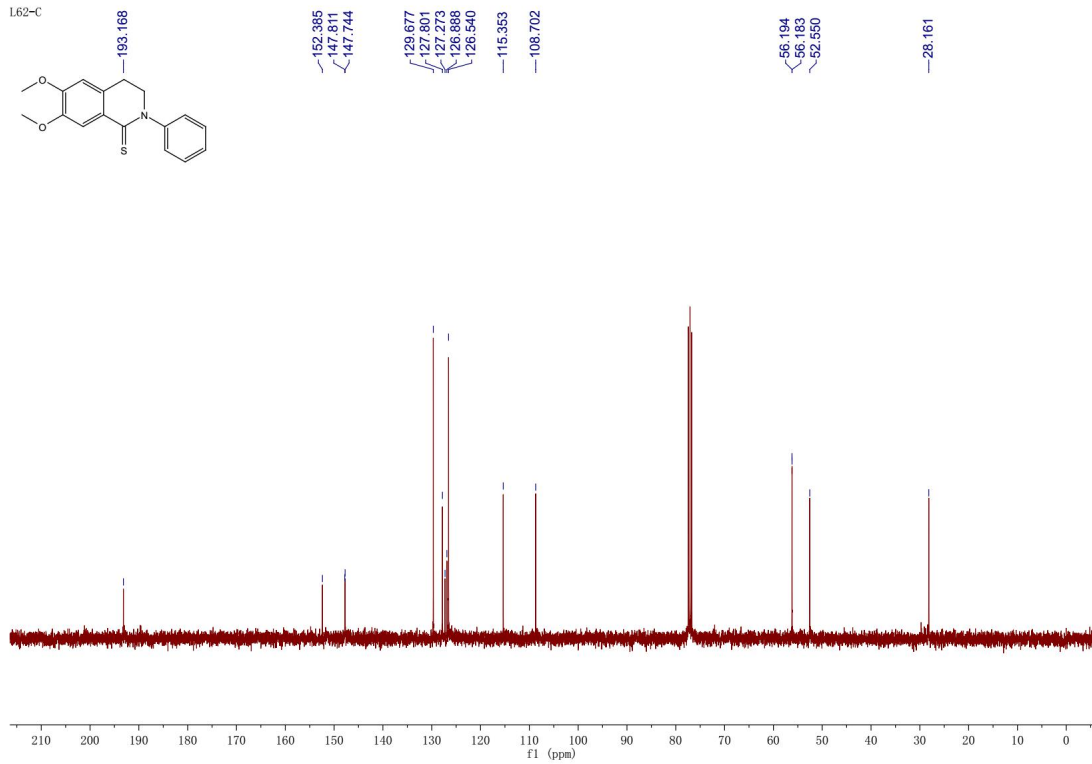

### NMR of 2av

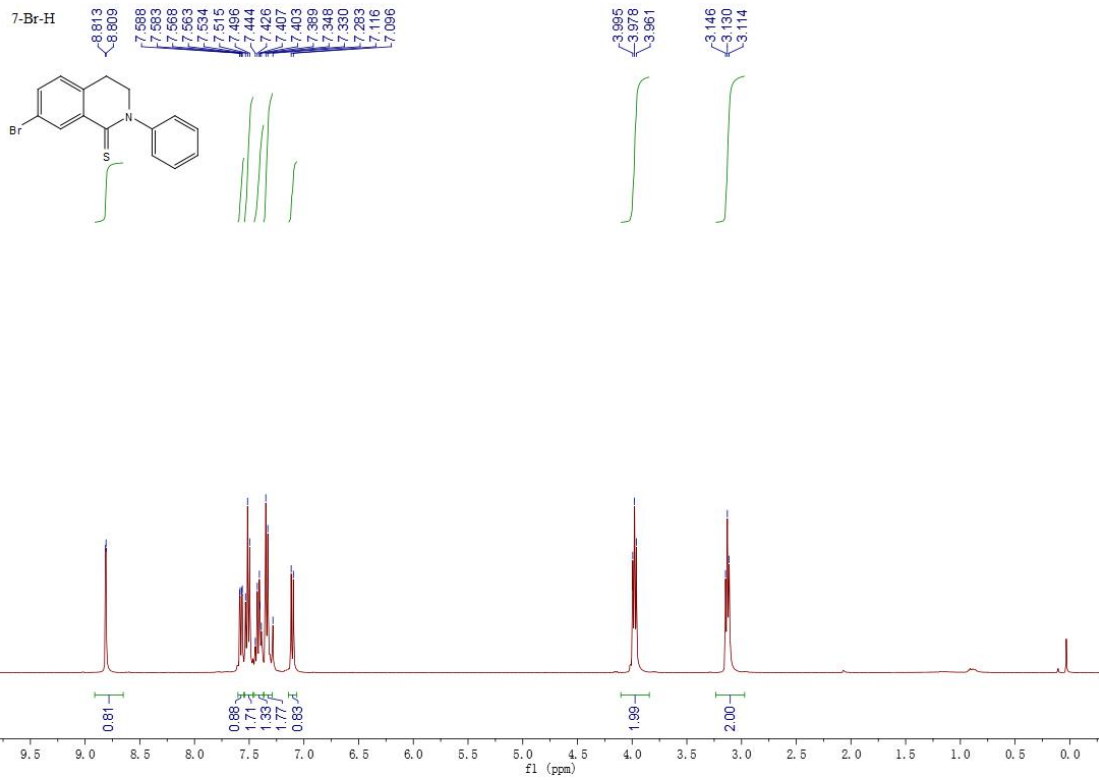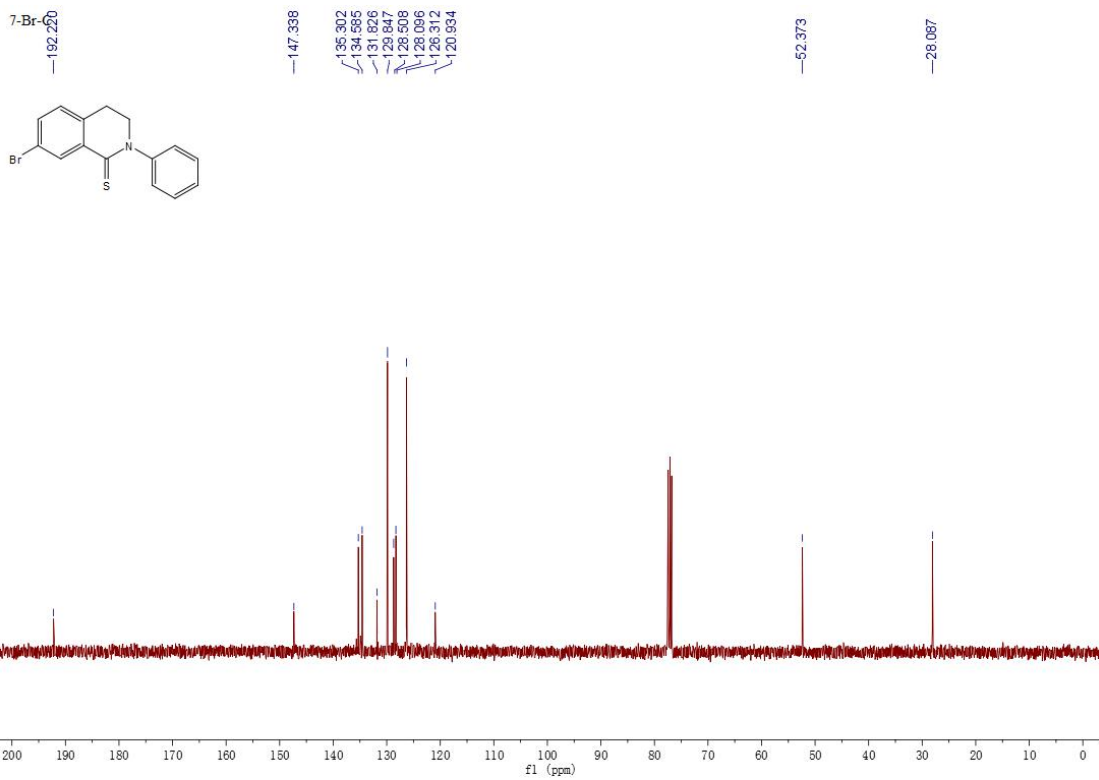

# NMR of 2aw

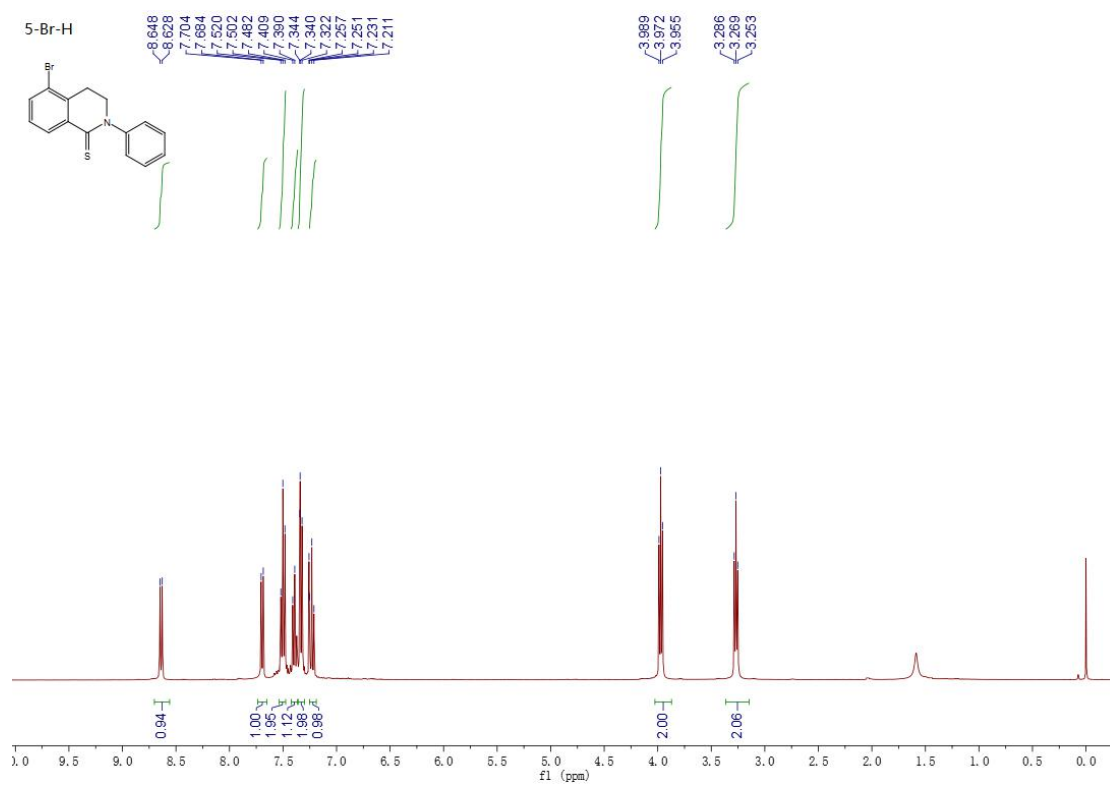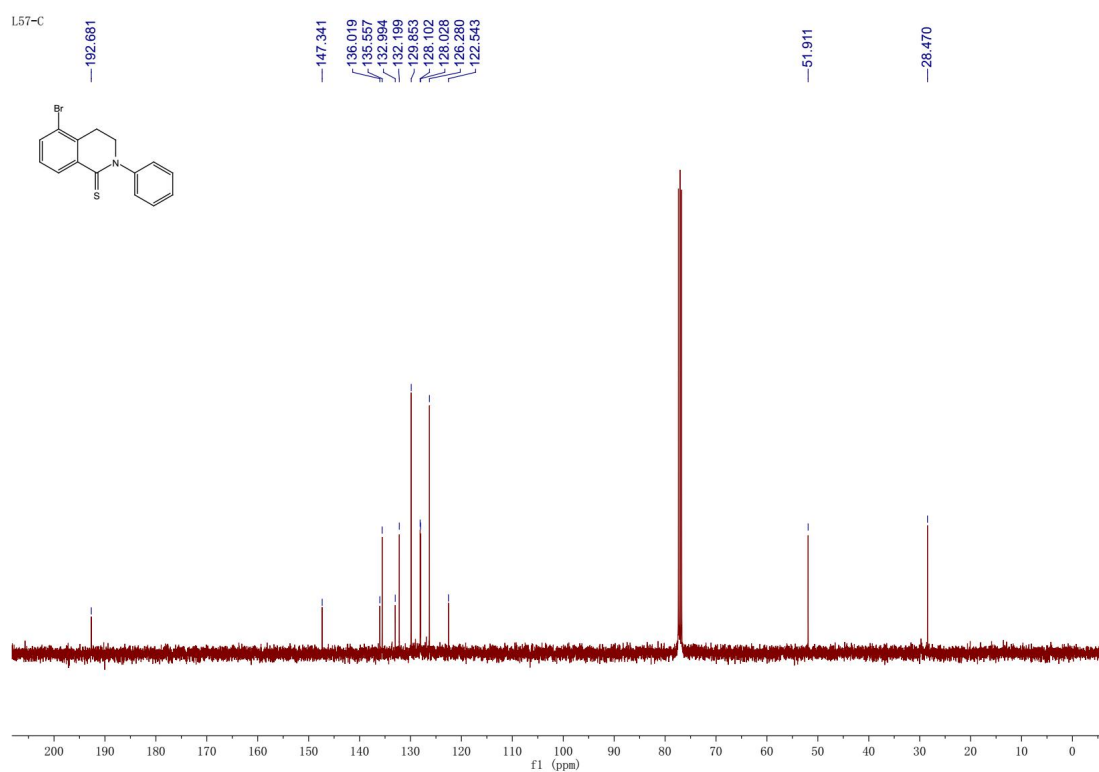

# NMR of 2ax

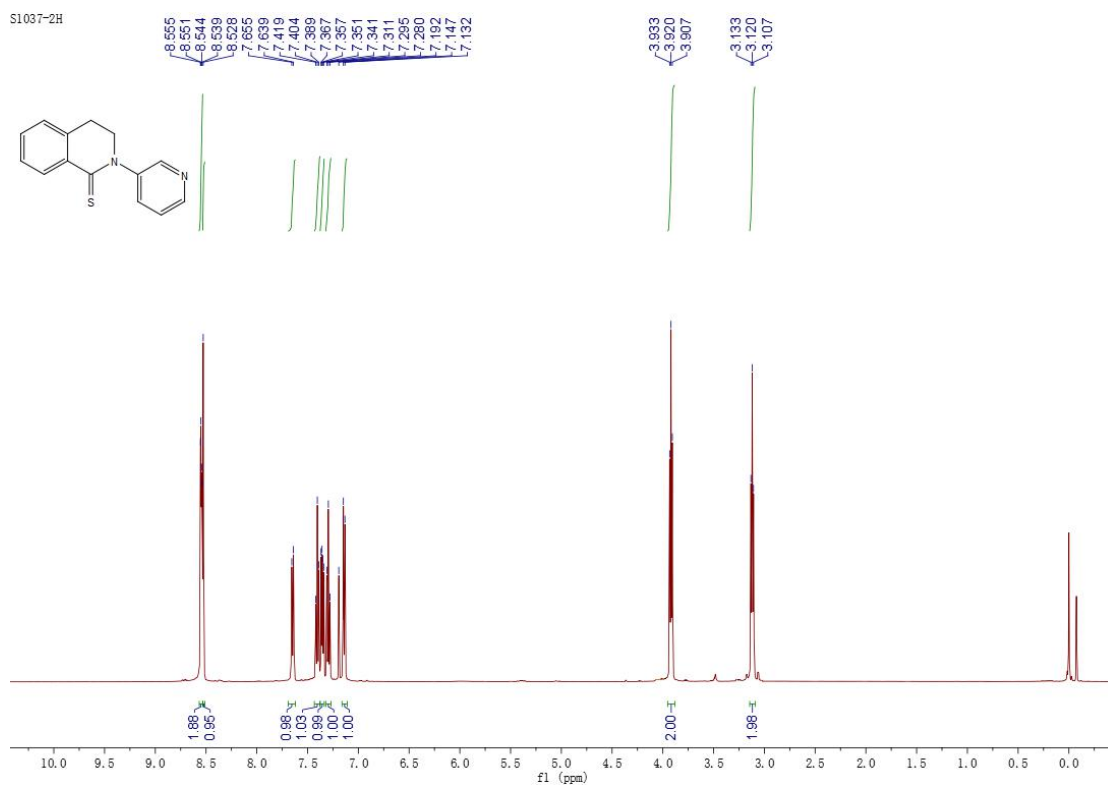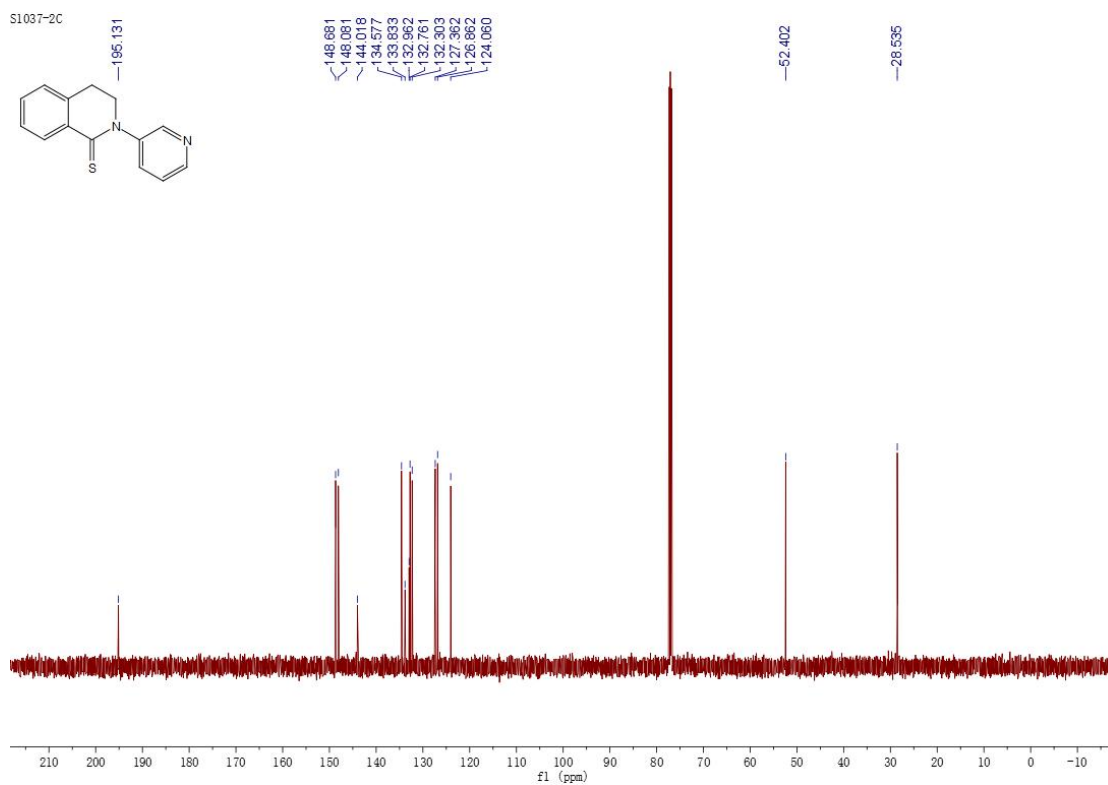

# NMR of 2ay

S1043-1H

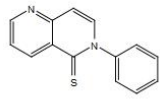

9.327  
9.310  
8.981  
8.963  
7.618  
7.603  
7.593  
7.578  
7.563  
7.527  
7.515  
7.509  
7.500  
7.384  
7.368  
7.263  
7.187  
7.172

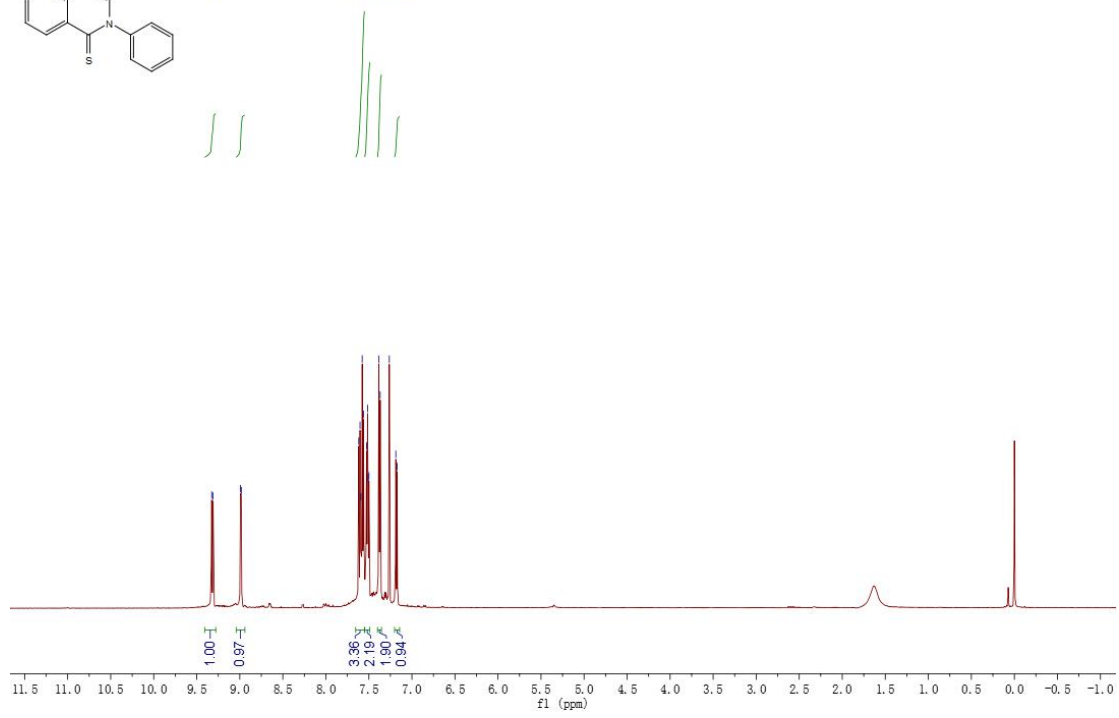

S1043-2C

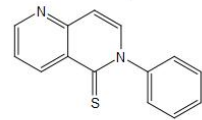

186.823  
155.226  
148.904  
145.644  
140.700  
137.459  
30.468  
29.890  
29.136  
26.935  
23.568  
113.294

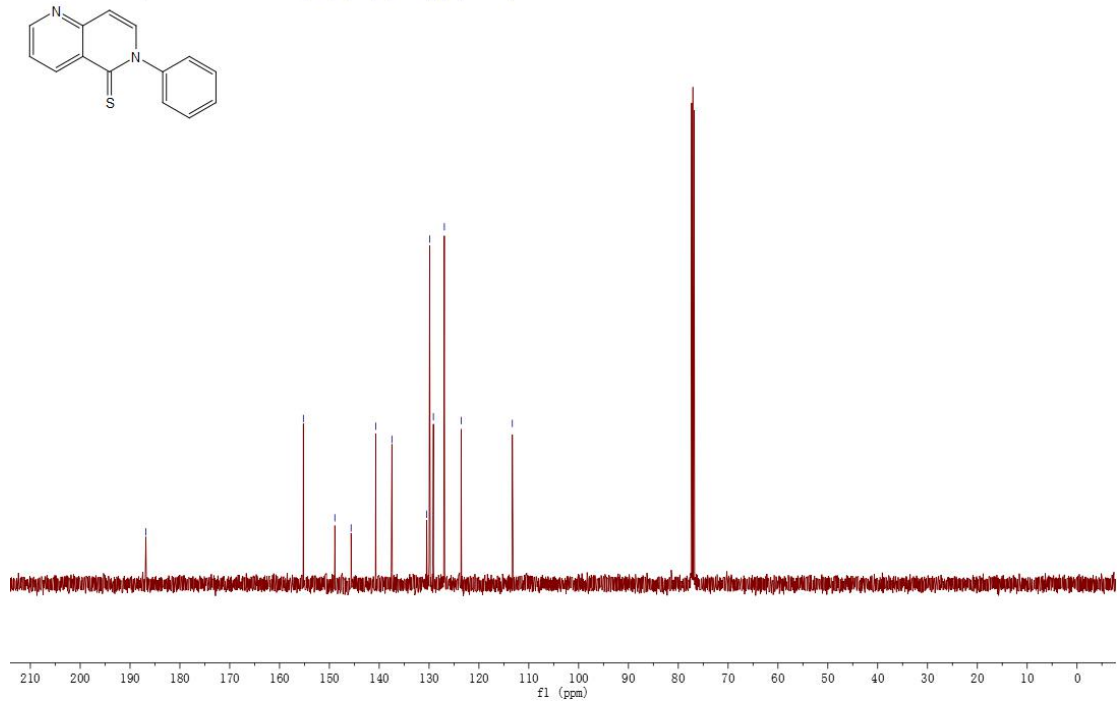



## 8. Molecular Coordinates and Free Energies

### 1a (1a, DMPU)

$\Delta G = -635.207575$  hartree

|   |           |           |           |
|---|-----------|-----------|-----------|
| C | 2.309497  | 0.706582  | 0.267491  |
| C | 3.664815  | 0.941671  | 0.004300  |
| C | 4.505241  | -0.104909 | -0.385629 |
| C | 3.986707  | -1.396564 | -0.527662 |
| C | 2.631847  | -1.633380 | -0.279168 |
| C | 1.789825  | -0.588631 | 0.123158  |
| C | 1.346785  | 1.788493  | 0.680740  |
| C | 0.337303  | -0.856190 | 0.453782  |
| N | -0.554078 | 0.279912  | 0.188070  |
| C | 0.003114  | 1.614358  | -0.034490 |
| C | -4.714281 | -0.410882 | -0.235545 |
| C | -4.143673 | 0.800199  | -0.641030 |
| C | -2.774516 | 1.035496  | -0.511402 |
| C | -1.913883 | 0.053716  | 0.044482  |
| C | -2.504661 | -1.170981 | 0.450444  |
| C | -3.875613 | -1.389236 | 0.308210  |
| H | 4.061295  | 1.949104  | 0.104674  |
| H | 5.555246  | 0.087589  | -0.586461 |
| H | 4.630860  | -2.213411 | -0.839952 |
| H | 2.226953  | -2.635328 | -0.400046 |
| H | 1.748880  | 2.779953  | 0.450252  |
| H | 1.179923  | 1.753544  | 1.766649  |
| H | 0.264015  | -1.153836 | 1.513897  |
| H | -0.000074 | -1.719229 | -0.131620 |
| H | 0.133994  | 1.819085  | -1.109593 |
| H | -0.701384 | 2.355353  | 0.354802  |
| H | -5.780087 | -0.587451 | -0.341614 |
| H | -4.767647 | 1.576623  | -1.076315 |
| H | -2.374592 | 1.978259  | -0.864238 |
| H | -1.899936 | -1.949352 | 0.899517  |
| H | -4.289954 | -2.338744 | 0.637476  |

|   |           |           |           |
|---|-----------|-----------|-----------|
| H | -4.226566 | -2.289553 | -1.657276 |
| H | -5.707819 | -1.899515 | 0.300821  |
| H | -4.721371 | -1.041063 | 2.435042  |
| H | -2.301107 | -0.560409 | 2.571874  |
| H | -2.031848 | -1.670992 | -2.784967 |
| H | -1.314329 | -3.011251 | -1.899726 |
| H | -0.019040 | -0.926188 | 1.605438  |
| H | -0.343107 | 0.619069  | 0.546466  |
| H | -0.340068 | -0.107319 | -1.961031 |
| H | 0.486393  | -1.572666 | -2.513834 |
| H | 5.363508  | -3.059044 | 0.410938  |
| H | 4.666125  | -2.224101 | -1.842016 |
| H | 2.414135  | -1.396095 | -2.231620 |
| H | 1.402773  | -2.276957 | 1.884672  |
| H | 3.681130  | -3.049199 | 2.263475  |
| N | -0.526823 | 2.367957  | -0.845259 |
| C | -1.962507 | 2.249587  | -1.077376 |
| C | -0.163643 | 2.031664  | 0.558343  |
| O | -0.895059 | 2.533643  | 1.518095  |
| N | 1.316519  | 2.123428  | 0.690991  |
| C | 1.762575  | 1.767368  | 2.033870  |
| C | 1.852260  | 3.442026  | 0.319004  |
| C | 1.457840  | 3.799876  | -1.109717 |
| C | -0.055702 | 3.695809  | -1.264921 |
| H | -2.317173 | 1.268189  | -0.755388 |
| H | -2.162683 | 2.353428  | -2.150741 |
| H | -2.551653 | 3.014777  | -0.542456 |
| H | 1.365004  | 0.790460  | 2.318297  |
| H | 1.449119  | 2.496260  | 2.801725  |
| H | 2.857179  | 1.707065  | 2.045322  |
| H | 2.944723  | 3.409201  | 0.419979  |
| H | 1.490400  | 4.229394  | 1.011378  |
| H | 1.948911  | 3.113555  | -1.811109 |
| H | 1.792055  | 4.816935  | -1.347930 |
| H | -0.347256 | 3.848462  | -2.312135 |
| H | -0.544278 | 4.499202  | -0.676796 |

### 1a (TS1, DMPU)

$\Delta G = -1055.685229$  hartree

|   |           |           |           |
|---|-----------|-----------|-----------|
| C | -2.431627 | -1.653696 | -0.663572 |
| C | -3.805352 | -1.909828 | -0.727884 |
| C | -4.643709 | -1.693534 | 0.372638  |
| C | -4.088548 | -1.208489 | 1.567101  |
| C | -2.723920 | -0.941839 | 1.644759  |
| C | -1.867040 | -1.155982 | 0.539978  |
| C | -1.527015 | -1.933877 | -1.846640 |
| C | -0.444446 | -0.792537 | 0.615589  |
| N | 0.383870  | -1.342234 | -0.425112 |
| C | -0.192301 | -1.176879 | -1.760308 |
| C | 4.352173  | -2.703607 | 0.239722  |
| C | 3.954847  | -2.240853 | -1.019803 |
| C | 2.659180  | -1.776175 | -1.247127 |
| C | 1.686987  | -1.769661 | -0.212349 |
| C | 2.107137  | -2.238189 | 1.061763  |
| C | 3.408202  | -2.690325 | 1.274015  |

### 1a (A, DMPU)

$\Delta G = -634.588731$  hartree

|   |           |           |           |
|---|-----------|-----------|-----------|
| C | 2.285372  | 0.719070  | 0.242690  |
| C | 3.662426  | 0.913071  | 0.290069  |
| C | 4.555016  | -0.134776 | 0.011320  |
| C | 4.047656  | -1.403641 | -0.320776 |
| C | 2.677140  | -1.618920 | -0.384382 |
| C | 1.760574  | -0.563338 | -0.110230 |
| C | 1.286457  | 1.793659  | 0.595490  |
| C | 0.360672  | -0.767979 | -0.175979 |
| N | -0.543203 | 0.270777  | -0.073021 |
| C | -0.014412 | 1.639872  | -0.200866 |
| C | -4.710829 | -0.472032 | 0.059224  |
| C | -4.219851 | 0.718973  | -0.485478 |
| C | -2.848231 | 0.973292  | -0.536171 |

|   |           |           |           |
|---|-----------|-----------|-----------|
| C | -1.928177 | 0.033012  | -0.026271 |
| C | -2.429304 | -1.164071 | 0.529750  |
| C | -3.801796 | -1.408994 | 0.563387  |
| H | 4.050334  | 1.894995  | 0.553073  |
| H | 5.626598  | 0.035224  | 0.052185  |
| H | 4.730496  | -2.221488 | -0.534692 |
| H | 2.290541  | -2.599725 | -0.650435 |
| H | 1.699182  | 2.790901  | 0.410116  |
| H | 1.047810  | 1.742732  | 1.667842  |
| H | -0.045567 | -1.748326 | -0.390085 |
| H | 0.161014  | 1.867959  | -1.261820 |
| H | -0.760584 | 2.337605  | 0.179173  |
| H | -5.778451 | -0.665398 | 0.092143  |
| H | -4.906901 | 1.457188  | -0.889511 |
| H | -2.499601 | 1.890972  | -0.995357 |
| H | -1.747226 | -1.886634 | 0.963784  |
| H | -4.161504 | -2.334623 | 1.004069  |

### 1a (B, DMPU)

$\Delta G = -634.450217$  hartree

|   |           |           |           |
|---|-----------|-----------|-----------|
| C | 2.288334  | 0.716761  | 0.260987  |
| C | 3.669958  | 0.879941  | 0.293204  |
| C | 4.514126  | -0.183474 | -0.053586 |
| C | 3.991198  | -1.429889 | -0.422707 |
| C | 2.613536  | -1.615317 | -0.447685 |
| C | 1.761275  | -0.541303 | -0.117953 |
| C | 1.310555  | 1.783782  | 0.687435  |
| C | 0.338391  | -0.728356 | -0.137645 |
| N | -0.515234 | 0.259944  | -0.050933 |
| C | -0.010093 | 1.667209  | -0.066722 |
| C | -4.678116 | -0.455005 | 0.010262  |
| C | -4.155759 | 0.573986  | -0.780027 |
| C | -2.782657 | 0.821931  | -0.800115 |
| C | -1.936174 | 0.023539  | -0.022535 |
| C | -2.447656 | -0.999094 | 0.783804  |
| C | -3.822991 | -1.238171 | 0.790545  |
| H | 4.093947  | 1.835158  | 0.587401  |
| H | 5.589722  | -0.037825 | -0.032086 |
| H | 4.656374  | -2.245610 | -0.684205 |
| H | 2.189272  | -2.574531 | -0.728316 |
| H | 1.718778  | 2.782507  | 0.513048  |
| H | 1.132401  | 1.695899  | 1.767634  |
| H | -0.073627 | -1.727268 | -0.242793 |
| H | 0.107912  | 1.952590  | -1.117646 |
| H | -0.776394 | 2.294305  | 0.385262  |
| H | -5.747399 | -0.640037 | 0.023394  |
| H | -4.814951 | 1.183868  | -1.389077 |
| H | -2.381660 | 1.609005  | -1.428828 |
| H | -1.787998 | -1.580522 | 1.419419  |
| H | -4.223289 | -2.026391 | 1.419745  |

### 1a (TS3, DMPU)

$\Delta G = -1829.177645$  hartree

|   |           |           |           |
|---|-----------|-----------|-----------|
| C | -2.432778 | -1.514398 | -0.122316 |
|---|-----------|-----------|-----------|

|   |           |           |           |
|---|-----------|-----------|-----------|
| C | -3.817132 | -1.718598 | -0.162069 |
| C | -4.707888 | -0.659875 | 0.018239  |
| C | -4.209986 | 0.628746  | 0.242464  |
| C | -2.835522 | 0.846158  | 0.287387  |
| C | -1.927361 | -0.215929 | 0.106899  |
| C | -1.469262 | -2.660396 | -0.298633 |
| C | -0.447797 | 0.042259  | 0.150967  |
| S | 0.096294  | 1.058120  | 1.556209  |
| S | 1.028342  | 2.729161  | 0.448812  |
| S | -0.116263 | 2.612345  | -1.285568 |
| N | 0.377926  | -1.034892 | -0.171284 |
| C | -0.181107 | -2.165544 | -0.939092 |
| C | 4.606403  | -0.984999 | -0.020945 |
| C | 3.933857  | -0.099816 | -0.866825 |
| C | 2.536149  | -0.087709 | -0.911489 |
| C | 1.812223  | -0.965984 | -0.098267 |
| C | 2.482327  | -1.863381 | 0.744308  |
| C | 3.877144  | -1.868475 | 0.783685  |
| H | -4.195202 | -2.722437 | -0.337328 |
| H | -5.778647 | -0.836687 | -0.017839 |
| H | -4.890611 | 1.462777  | 0.383846  |
| H | -2.458147 | 1.845042  | 0.471310  |
| H | -1.908600 | -3.442018 | -0.926018 |
| H | -1.241140 | -3.117605 | 0.673844  |
| H | -0.338924 | 1.088886  | -0.849814 |
| H | -0.364567 | -1.834535 | -1.972196 |
| H | 0.577938  | -2.947491 | -0.969556 |
| H | 5.691688  | -0.990099 | 0.010153  |
| H | 4.493523  | 0.582718  | -1.499234 |
| H | 2.015339  | 0.588170  | -1.580417 |
| H | 1.909528  | -2.541188 | 1.369663  |
| H | 4.392764  | -2.557674 | 1.445436  |

### 1a (2a, DMPU)

$\Delta G = -1032.229266$  hartree

|   |           |           |           |
|---|-----------|-----------|-----------|
| C | 2.283694  | -1.007114 | -0.122208 |
| C | 3.655940  | -1.272434 | -0.068944 |
| C | 4.576052  | -0.239801 | 0.120317  |
| C | 4.124762  | 1.077617  | 0.258920  |
| C | 2.761600  | 1.355167  | 0.193185  |
| C | 1.825590  | 0.323495  | -0.000833 |
| C | 1.267113  | -2.101464 | -0.316358 |
| C | 0.367474  | 0.629981  | -0.103447 |
| S | -0.188752 | 2.191080  | -0.466758 |
| N | -0.478049 | -0.404742 | 0.087461  |
| C | 0.005935  | -1.757893 | 0.459873  |
| C | -4.695806 | -0.065639 | 0.080383  |
| C | -4.018296 | -0.404061 | -1.095663 |
| C | -2.623864 | -0.496060 | -1.101188 |
| C | -1.912032 | -0.239001 | 0.073356  |
| C | -2.581380 | 0.090303  | 1.255138  |
| C | -3.976049 | 0.178534  | 1.254729  |
| H | 4.002061  | -2.297612 | -0.168438 |
| H | 5.638021  | -0.462109 | 0.167546  |
| H | 4.832851  | 1.885072  | 0.417764  |

|   |           |           |           |
|---|-----------|-----------|-----------|
| H | 2.403700  | 2.373243  | 0.292308  |
| H | 1.658550  | -3.063224 | 0.027600  |
| H | 1.024855  | -2.211410 | -1.382433 |
| H | 0.193070  | -1.783092 | 1.541552  |
| H | -0.798555 | -2.459681 | 0.238636  |
| H | -5.779427 | 0.003311  | 0.082774  |
| H | -4.572969 | -0.598251 | -2.008702 |
| H | -2.088032 | -0.757992 | -2.008150 |
| H | -2.014127 | 0.281218  | 2.160680  |
| H | -4.498037 | 0.436669  | 2.171201  |

### 1a (1a, DMF)

$\Delta G = -635.207599$  hartree

|   |           |           |           |
|---|-----------|-----------|-----------|
| C | 2.309497  | 0.706582  | 0.267491  |
| C | 3.664815  | 0.941671  | 0.004300  |
| C | 4.505241  | -0.104909 | -0.385629 |
| C | 3.986707  | -1.396564 | -0.527662 |
| C | 2.631847  | -1.633380 | -0.279168 |
| C | 1.789825  | -0.588631 | 0.123158  |
| C | 1.346785  | 1.788493  | 0.680740  |
| C | 0.337303  | -0.856190 | 0.453782  |
| N | -0.554078 | 0.279912  | 0.188070  |
| C | 0.003114  | 1.614358  | -0.034490 |
| C | -4.714281 | -0.410882 | -0.235545 |
| C | -4.143673 | 0.800199  | -0.641030 |
| C | -2.774516 | 1.035496  | -0.511402 |
| C | -1.913883 | 0.053716  | 0.044482  |
| C | -2.504661 | -1.170981 | 0.450444  |
| C | -3.875613 | -1.389236 | 0.308210  |
| H | 4.061295  | 1.949104  | 0.104674  |
| H | 5.555246  | 0.087589  | -0.586461 |
| H | 4.630860  | -2.213411 | -0.839952 |
| H | 2.226953  | -2.635328 | -0.400046 |
| H | 1.748880  | 2.779953  | 0.450252  |
| H | 1.179923  | 1.753544  | 1.766649  |
| H | 0.264015  | -1.153836 | 1.513897  |
| H | -0.000074 | -1.719229 | -0.131620 |
| H | 0.133994  | 1.819085  | -1.109593 |
| H | -0.701384 | 2.355353  | 0.354802  |
| H | -5.780087 | -0.587451 | -0.341614 |
| H | -4.767647 | 1.576623  | -1.076315 |
| H | -2.374592 | 1.978259  | -0.864238 |
| H | -1.899936 | -1.949352 | 0.899517  |
| H | -4.289954 | -2.338744 | 0.637476  |

### 1a (TS1, DMF)

$\Delta G = -883.669229$  hartree

|   |          |           |           |
|---|----------|-----------|-----------|
| C | 1.834459 | -1.832918 | 0.480730  |
| C | 3.139312 | -2.328895 | 0.558337  |
| C | 4.093528 | -2.038084 | -0.425145 |
| C | 3.724539 | -1.230114 | -1.512349 |
| C | 2.432394 | -0.718828 | -1.597935 |
| C | 1.459372 | -1.002079 | -0.607965 |
| C | 0.789505 | -2.194758 | 1.514015  |

|   |           |           |           |
|---|-----------|-----------|-----------|
| C | 0.129208  | -0.390709 | -0.699210 |
| N | -0.862755 | -0.929106 | 0.194177  |
| C | -0.339851 | -1.163213 | 1.546844  |
| C | -5.017499 | -0.376882 | -0.525771 |
| C | -4.567644 | -1.159051 | 0.545942  |
| C | -3.207481 | -1.330081 | 0.795273  |
| C | -2.224041 | -0.713579 | -0.022251 |
| C | -2.694059 | 0.080716  | -1.099777 |
| C | -4.060823 | 0.234952  | -1.340923 |
| H | 3.411462  | -2.962027 | 1.401210  |
| H | 5.101865  | -2.434242 | -0.346985 |
| H | 4.447576  | -0.999658 | -2.290867 |
| H | 2.156365  | -0.089724 | -2.441592 |
| H | 1.242442  | -2.270377 | 2.510306  |
| H | 0.361613  | -3.181721 | 1.286950  |
| H | -0.232317 | -0.323490 | -1.724071 |
| H | 0.230524  | 0.997923  | -0.428600 |
| H | 0.039925  | -0.211353 | 1.949481  |
| H | -1.135213 | -1.501717 | 2.206546  |
| H | -6.078556 | -0.249101 | -0.716363 |
| H | -5.283980 | -1.656012 | 1.195388  |
| H | -2.913708 | -1.971931 | 1.617524  |
| H | -1.994911 | 0.603609  | -1.739346 |
| H | -4.375155 | 0.857775  | -2.174834 |
| N | 1.031855  | 2.654643  | 0.872057  |
| C | 0.663367  | 3.864535  | 1.608854  |
| C | 2.438968  | 2.686110  | 0.486446  |
| C | 0.117335  | 2.371483  | -0.252420 |
| O | 0.293043  | 2.970024  | -1.409119 |
| H | -0.386007 | 3.807958  | 1.915893  |
| H | 0.798326  | 4.789582  | 1.015930  |
| H | 1.277708  | 3.953620  | 2.513467  |
| H | 2.698061  | 3.553028  | -0.146804 |
| H | 2.691848  | 1.776732  | -0.065562 |
| H | 3.062948  | 2.729579  | 1.387333  |
| H | -0.912409 | 2.390967  | 0.168137  |

### 1a (A, DMF)

$\Delta G = -634.593646$  hartree

|   |           |           |           |
|---|-----------|-----------|-----------|
| C | 2.285372  | 0.719070  | 0.242690  |
| C | 3.662426  | 0.913071  | 0.290069  |
| C | 4.555016  | -0.134776 | 0.011320  |
| C | 4.047656  | -1.403641 | -0.320776 |
| C | 2.677140  | -1.618920 | -0.384382 |
| C | 1.760574  | -0.563338 | -0.110230 |
| C | 1.286457  | 1.793659  | 0.595490  |
| C | 0.360672  | -0.767979 | -0.175979 |
| N | -0.543203 | 0.270777  | -0.073021 |
| C | -0.014412 | 1.639872  | -0.200866 |
| C | -4.710829 | -0.472032 | 0.059224  |
| C | -4.219851 | 0.718973  | -0.485478 |
| C | -2.848231 | 0.973292  | -0.536171 |
| C | -1.928177 | 0.033012  | -0.026271 |
| C | -2.429304 | -1.164071 | 0.529750  |
| C | -3.801796 | -1.408994 | 0.563387  |

|   |           |           |           |
|---|-----------|-----------|-----------|
| H | 4.050334  | 1.894995  | 0.553073  |
| H | 5.626598  | 0.035224  | 0.052185  |
| H | 4.730496  | -2.221488 | -0.534692 |
| H | 2.290541  | -2.599725 | -0.650435 |
| H | 1.699182  | 2.790901  | 0.410116  |
| H | 1.047810  | 1.742732  | 1.667842  |
| H | -0.045567 | -1.748326 | -0.390085 |
| H | 0.161014  | 1.867959  | -1.261820 |
| H | -0.760584 | 2.337605  | 0.179173  |
| H | -5.778451 | -0.665398 | 0.092143  |
| H | -4.906901 | 1.457188  | -0.889511 |
| H | -2.499601 | 1.890972  | -0.995357 |
| H | -1.747226 | -1.886634 | 0.963784  |
| H | -4.161504 | -2.334623 | 1.004069  |

### 1a (B, DMF)

$\Delta G = -634.455396$  hartree

|   |           |           |           |
|---|-----------|-----------|-----------|
| C | 2.288334  | 0.716761  | 0.260987  |
| C | 3.669958  | 0.879941  | 0.293204  |
| C | 4.514126  | -0.183474 | -0.053586 |
| C | 3.991198  | -1.429889 | -0.422707 |
| C | 2.613536  | -1.615317 | -0.447685 |
| C | 1.761275  | -0.541303 | -0.117953 |
| C | 1.310555  | 1.783782  | 0.687435  |
| C | 0.338391  | -0.728356 | -0.137645 |
| N | -0.515234 | 0.259944  | -0.050933 |
| C | -0.010093 | 1.667209  | -0.066722 |
| C | -4.678116 | -0.455005 | 0.010262  |
| C | -4.155759 | 0.573986  | -0.780027 |
| C | -2.782657 | 0.821931  | -0.800115 |
| C | -1.936174 | 0.023539  | -0.022535 |
| C | -2.447656 | -0.999094 | 0.783804  |
| C | -3.822991 | -1.238171 | 0.790545  |
| H | 4.093947  | 1.835158  | 0.587401  |
| H | 5.589722  | -0.037825 | -0.032086 |
| H | 4.656374  | -2.245610 | -0.684205 |
| H | 2.189272  | -2.574531 | -0.728316 |
| H | 1.718778  | 2.782507  | 0.513048  |
| H | 1.132401  | 1.695899  | 1.767634  |
| H | -0.073627 | -1.727268 | -0.242793 |
| H | 0.107912  | 1.952590  | -1.117646 |
| H | -0.776394 | 2.294305  | 0.385262  |
| H | -5.747399 | -0.640037 | 0.023394  |
| H | -4.814951 | 1.183868  | -1.389077 |
| H | -2.381660 | 1.609005  | -1.428828 |
| H | -1.787998 | -1.580522 | 1.419419  |
| H | -4.223289 | -2.026391 | 1.419745  |

### 1a (TS3, DMF)

$\Delta G = -1829.183074$  hartree

|   |           |           |           |
|---|-----------|-----------|-----------|
| C | -2.432778 | -1.514398 | -0.122316 |
| C | -3.817132 | -1.718598 | -0.162069 |
| C | -4.707888 | -0.659875 | 0.018239  |
| C | -4.209986 | 0.628746  | 0.242464  |

|   |           |           |           |
|---|-----------|-----------|-----------|
| C | -2.835522 | 0.846158  | 0.287387  |
| C | -1.927361 | -0.215929 | 0.106899  |
| C | -1.469262 | -2.660396 | -0.298633 |
| C | -0.447797 | 0.042259  | 0.150967  |
| S | 0.096294  | 1.058120  | 1.556209  |
| S | 1.028342  | 2.729161  | 0.448812  |
| S | -0.116263 | 2.612345  | -1.285568 |
| N | 0.377926  | -1.034892 | -0.171284 |
| C | -0.181107 | -2.165544 | -0.939092 |
| C | 4.606403  | -0.984999 | -0.020945 |
| C | 3.933857  | -0.099816 | -0.866825 |
| C | 2.536149  | -0.087709 | -0.911489 |
| C | 1.812223  | -0.965984 | -0.098267 |
| C | 2.482327  | -1.863381 | 0.744308  |
| C | 3.877144  | -1.868475 | 0.783685  |
| H | -4.195202 | -2.722437 | -0.337328 |
| H | -5.778647 | -0.836687 | -0.017839 |
| H | -4.890611 | 1.462777  | 0.383846  |
| H | -2.458147 | 1.845042  | 0.471310  |
| H | -1.908600 | -3.442018 | -0.926018 |
| H | -1.241140 | -3.117605 | 0.673844  |
| H | -0.338924 | 1.088886  | -0.849814 |
| H | -0.364567 | -1.834535 | -1.972196 |
| H | 0.577938  | -2.947491 | -0.969556 |
| H | 5.691688  | -0.990099 | 0.010153  |
| H | 4.493523  | 0.582718  | -1.499234 |
| H | 2.015339  | 0.588170  | -1.580417 |
| H | 1.909528  | -2.541188 | 1.369663  |
| H | 4.392764  | -2.557674 | 1.445436  |

### 1a (2a, DMF)

$\Delta G = -1032.229317$  hartree

|   |           |           |           |
|---|-----------|-----------|-----------|
| C | 2.283694  | -1.007114 | -0.122208 |
| C | 3.655940  | -1.272434 | -0.068944 |
| C | 4.576052  | -0.239801 | 0.120317  |
| C | 4.124762  | 1.077617  | 0.258920  |
| C | 2.761600  | 1.355167  | 0.193185  |
| C | 1.825590  | 0.323495  | -0.000833 |
| C | 1.267113  | -2.101464 | -0.316358 |
| C | 0.367474  | 0.629981  | -0.103447 |
| S | -0.188752 | 2.191080  | -0.466758 |
| N | -0.478049 | -0.404742 | 0.087461  |
| C | 0.005935  | -1.757893 | 0.459873  |
| C | -4.695806 | -0.065639 | 0.080383  |
| C | -4.018296 | -0.404061 | -1.095663 |
| C | -2.623864 | -0.496060 | -1.101188 |
| C | -1.912032 | -0.239001 | 0.073356  |
| C | -2.581380 | 0.090303  | 1.255138  |
| C | -3.976049 | 0.178534  | 1.254729  |
| H | 4.002061  | -2.297612 | -0.168438 |
| H | 5.638021  | -0.462109 | 0.167546  |
| H | 4.832851  | 1.885072  | 0.417764  |
| H | 2.403700  | 2.373243  | 0.292308  |
| H | 1.658550  | -3.063224 | 0.027600  |
| H | 1.024855  | -2.211410 | -1.382433 |

|   |           |           |           |
|---|-----------|-----------|-----------|
| H | 0.193070  | -1.783092 | 1.541552  |
| H | -0.798555 | -2.459681 | 0.238636  |
| H | -5.779427 | 0.003311  | 0.082774  |
| H | -4.572969 | -0.598251 | -2.008702 |
| H | -2.088032 | -0.757992 | -2.008150 |
| H | -2.014127 | 0.281218  | 2.160680  |
| H | -4.498037 | 0.436669  | 2.171201  |

### 1a (1a, DMA)

$\Delta G = -635.207605$  hartree

|   |           |           |           |
|---|-----------|-----------|-----------|
| C | 2.309497  | 0.706582  | 0.267491  |
| C | 3.664815  | 0.941671  | 0.004300  |
| C | 4.505241  | -0.104909 | -0.385629 |
| C | 3.986707  | -1.396564 | -0.527662 |
| C | 2.631847  | -1.633380 | -0.279168 |
| C | 1.789825  | -0.588631 | 0.123158  |
| C | 1.346785  | 1.788493  | 0.680740  |
| C | 0.337303  | -0.856190 | 0.453782  |
| N | -0.554078 | 0.279912  | 0.188070  |
| C | 0.003114  | 1.614358  | -0.034490 |
| C | -4.714281 | -0.410882 | -0.235545 |
| C | -4.143673 | 0.800199  | -0.641030 |
| C | -2.774516 | 1.035496  | -0.511402 |
| C | -1.913883 | 0.053716  | 0.044482  |
| C | -2.504661 | -1.170981 | 0.450444  |
| C | -3.875613 | -1.389236 | 0.308210  |
| H | 4.061295  | 1.949104  | 0.104674  |
| H | 5.555246  | 0.087589  | -0.586461 |
| H | 4.630860  | -2.213411 | -0.839952 |
| H | 2.226953  | -2.635328 | -0.400046 |
| H | 1.748880  | 2.779953  | 0.450252  |
| H | 1.179923  | 1.753544  | 1.766649  |
| H | 0.264015  | -1.153836 | 1.513897  |
| H | -0.000074 | -1.719229 | -0.131620 |
| H | 0.133994  | 1.819085  | -1.109593 |
| H | -0.701384 | 2.355353  | 0.354802  |
| H | -5.780087 | -0.587451 | -0.341614 |
| H | -4.767647 | 1.576623  | -1.076315 |
| H | -2.374592 | 1.978259  | -0.864238 |
| H | -1.899936 | -1.949352 | 0.899517  |
| H | -4.289954 | -2.338744 | 0.637476  |

### 1a (TS1, DMA)

$\Delta G = -922.964703$  hartree

|   |           |           |           |
|---|-----------|-----------|-----------|
| C | 1.989514  | -1.708532 | 0.663298  |
| C | 3.309536  | -2.156418 | 0.772865  |
| C | 4.218007  | -2.026466 | -0.285309 |
| C | 3.786261  | -1.434697 | -1.483114 |
| C | 2.477664  | -0.975023 | -1.604670 |
| C | 1.551280  | -1.096106 | -0.540681 |
| C | 0.998438  | -1.905680 | 1.789962  |
| C | 0.207100  | -0.523311 | -0.653558 |
| N | -0.742814 | -0.958098 | 0.340485  |
| C | -0.199141 | -0.948747 | 1.699826  |

|   |           |           |           |
|---|-----------|-----------|-----------|
| C | -4.923888 | -0.999866 | -0.412576 |
| C | -4.432133 | -0.725604 | 0.867851  |
| C | -3.060404 | -0.688177 | 1.125099  |
| C | -2.113999 | -0.944254 | 0.100620  |
| C | -2.628169 | -1.216419 | -1.194814 |
| C | -3.999870 | -1.240695 | -1.437614 |
| H | 3.631687  | -2.620928 | 1.703409  |
| H | 5.239320  | -2.380783 | -0.179367 |
| H | 4.472669  | -1.333485 | -2.320106 |
| H | 2.154189  | -0.512242 | -2.534263 |
| H | 1.490154  | -1.775101 | 2.762068  |
| H | 0.619130  | -2.937382 | 1.769433  |
| H | -0.196345 | -0.549448 | -1.662231 |
| H | 0.314850  | 0.885274  | -0.554239 |
| H | 0.101771  | 0.072064  | 1.977914  |
| H | -0.962008 | -1.279912 | 2.403242  |
| H | -5.991581 | -1.021913 | -0.607743 |
| H | -5.121699 | -0.519987 | 1.682894  |
| H | -2.730947 | -0.436002 | 2.125800  |
| H | -1.950735 | -1.438950 | -2.011250 |
| H | -4.349354 | -1.463164 | -2.442862 |
| N | 0.643236  | 2.686645  | 0.738710  |
| C | 0.379141  | 4.098359  | 1.036237  |
| C | 2.034267  | 2.369569  | 1.051730  |
| C | 0.279010  | 2.291559  | -0.653172 |
| O | 1.087462  | 2.650787  | -1.625625 |
| H | -0.676601 | 4.336416  | 0.881459  |
| H | 0.983058  | 4.791195  | 0.419756  |
| H | 0.614984  | 4.298323  | 2.088487  |
| H | 2.756621  | 2.982868  | 0.484340  |
| H | 2.235693  | 1.318889  | 0.828391  |
| H | 2.214543  | 2.536258  | 2.120815  |
| C | -1.217276 | 2.507057  | -0.919729 |
| H | -1.430492 | 3.562741  | -1.144695 |
| H | -1.511693 | 1.923856  | -1.798810 |
| H | -1.841895 | 2.195998  | -0.075306 |

### 1a (A, DMA)

$\Delta G = -634.593650$  hartree

|   |           |           |           |
|---|-----------|-----------|-----------|
| C | 2.285347  | 0.719027  | 0.242671  |
| C | 3.662428  | 0.912911  | 0.289971  |
| C | 4.554967  | -0.134953 | 0.011139  |
| C | 4.047486  | -1.403776 | -0.320992 |
| C | 2.676964  | -1.618954 | -0.384496 |
| C | 1.760456  | -0.563353 | -0.110241 |
| C | 1.286602  | 1.793786  | 0.595521  |
| C | 0.360522  | -0.767880 | -0.175855 |
| N | -0.543189 | 0.270969  | -0.072512 |
| C | -0.014405 | 1.639997  | -0.200615 |
| C | -4.710681 | -0.472204 | 0.058972  |
| C | -4.219790 | 0.718746  | -0.485923 |
| C | -2.848198 | 0.973251  | -0.536420 |
| C | -1.928205 | 0.033201  | -0.026041 |
| C | -2.429207 | -1.163839 | 0.530137  |
| C | -3.801655 | -1.408967 | 0.563530  |

|   |           |           |           |
|---|-----------|-----------|-----------|
| H | 4.050395  | 1.894825  | 0.552993  |
| H | 5.626560  | 0.034989  | 0.051959  |
| H | 4.730245  | -2.221679 | -0.535008 |
| H | 2.290263  | -2.599723 | -0.650581 |
| H | 1.699413  | 2.790958  | 0.409922  |
| H | 1.048116  | 1.743084  | 1.667931  |
| H | -0.045920 | -1.748191 | -0.389831 |
| H | 0.160997  | 1.867976  | -1.261631 |
| H | -0.760497 | 2.337867  | 0.179357  |
| H | -5.778289 | -0.665721 | 0.091716  |
| H | -4.906904 | 1.456723  | -0.890295 |
| H | -2.499502 | 1.890831  | -0.995768 |
| H | -1.746949 | -1.886144 | 0.964354  |
| H | -4.161388 | -2.334541 | 1.004321  |

### 1a (B, DMA)

$\Delta G = -634.455420$  hartree

|   |           |           |           |
|---|-----------|-----------|-----------|
| C | 2.288312  | 0.716696  | 0.261051  |
| C | 3.669955  | 0.879841  | 0.293250  |
| C | 4.514092  | -0.183547 | -0.053665 |
| C | 3.991142  | -1.429920 | -0.422900 |
| C | 2.613475  | -1.615327 | -0.447834 |
| C | 1.761257  | -0.541326 | -0.117976 |
| C | 1.310595  | 1.783726  | 0.687634  |
| C | 0.338327  | -0.728360 | -0.137642 |
| N | -0.515200 | 0.259979  | -0.050927 |
| C | -0.010108 | 1.667257  | -0.066456 |
| C | -4.678067 | -0.454942 | 0.010300  |
| C | -4.155565 | 0.572908  | -0.781393 |
| C | -2.782459 | 0.820835  | -0.801550 |
| C | -1.936198 | 0.023576  | -0.022586 |
| C | -2.447772 | -0.997917 | 0.785089  |
| C | -3.823124 | -1.236994 | 0.791888  |
| H | 4.093961  | 1.835029  | 0.587521  |
| H | 5.589690  | -0.037916 | -0.032177 |
| H | 4.656298  | -2.245621 | -0.684519 |
| H | 2.189157  | -2.574486 | -0.728564 |
| H | 1.718848  | 2.782441  | 0.513263  |
| H | 1.132516  | 1.695774  | 1.767837  |
| H | -0.073720 | -1.727265 | -0.242783 |
| H | 0.107844  | 1.952869  | -1.117320 |
| H | -0.776422 | 2.294230  | 0.385687  |
| H | -5.747351 | -0.639974 | 0.023459  |
| H | -4.814639 | 1.181862  | -1.391500 |
| H | -2.381251 | 1.606955  | -1.431324 |
| H | -1.788143 | -1.578450 | 1.421544  |
| H | -4.223559 | -2.024327 | 1.422111  |

### 1a (TS3, DMA)

$\Delta G = -1829.179411$  hartree

|   |           |           |           |
|---|-----------|-----------|-----------|
| C | -2.433012 | -1.514161 | -0.122341 |
| C | -3.817385 | -1.718197 | -0.162148 |
| C | -4.708018 | -0.659383 | 0.018223  |
| C | -4.209962 | 0.629153  | 0.242562  |

|   |           |           |           |
|---|-----------|-----------|-----------|
| C | -2.835473 | 0.846401  | 0.287526  |
| C | -1.927427 | -0.215773 | 0.106974  |
| C | -1.469646 | -2.660278 | -0.298661 |
| C | -0.447831 | 0.042270  | 0.151022  |
| S | 0.096539  | 1.058076  | 1.556188  |
| S | 1.028945  | 2.728774  | 0.448682  |
| S | -0.115974 | 2.612214  | -1.285496 |
| N | 0.377753  | -1.035030 | -0.171204 |
| C | -0.181386 | -2.165587 | -0.939048 |
| C | 4.606219  | -0.985022 | -0.021055 |
| C | 3.933582  | -0.099959 | -0.866987 |
| C | 2.535874  | -0.087933 | -0.911562 |
| C | 1.812047  | -0.966127 | -0.098160 |
| C | 2.482237  | -1.863442 | 0.744419  |
| C | 3.877057  | -1.868467 | 0.783694  |
| H | -4.195575 | -2.721978 | -0.337488 |
| H | -5.778798 | -0.836062 | -0.017895 |
| H | -4.890487 | 1.463258  | 0.383991  |
| H | -2.457984 | 1.845233  | 0.471495  |
| H | -1.909070 | -3.441838 | -0.926067 |
| H | -1.241620 | -3.117526 | 0.673823  |
| H | -0.338856 | 1.088804  | -0.849843 |
| H | -0.364749 | -1.834565 | -1.972168 |
| H | 0.577551  | -2.947643 | -0.969461 |
| H | 5.691505  | -0.990051 | 0.009994  |
| H | 4.493178  | 0.582550  | -1.499485 |
| H | 2.014958  | 0.587826  | -1.580540 |
| H | 1.909511  | -2.541223 | 1.369866  |
| H | 4.392759  | -2.557580 | 1.445473  |

### 1a (2a, DMA)

$\Delta G = -1032.229330$  hartree

|   |           |           |           |
|---|-----------|-----------|-----------|
| C | 2.283596  | -1.007150 | -0.122118 |
| C | 3.655810  | -1.272620 | -0.068912 |
| C | 4.576066  | -0.240064 | 0.120183  |
| C | 4.124946  | 1.077423  | 0.258620  |
| C | 2.761810  | 1.355106  | 0.192977  |
| C | 1.825639  | 0.323502  | -0.000743 |
| C | 1.266951  | -2.101459 | -0.316227 |
| C | 0.367521  | 0.630305  | -0.103125 |
| S | -0.188581 | 2.191171  | -0.466482 |
| N | -0.478083 | -0.404708 | 0.087357  |
| C | 0.005817  | -1.757666 | 0.459998  |
| C | -4.695882 | -0.065725 | 0.080258  |
| C | -4.018321 | -0.404053 | -1.095790 |
| C | -2.623882 | -0.496002 | -1.101279 |
| C | -1.912028 | -0.238879 | 0.073248  |
| C | -2.581478 | 0.090307  | 1.255029  |
| C | -3.976143 | 0.178494  | 1.254615  |
| H | 4.001794  | -2.297849 | -0.168347 |
| H | 5.638009  | -0.462483 | 0.167416  |
| H | 4.833134  | 1.884829  | 0.417312  |
| H | 2.403990  | 2.373228  | 0.291973  |
| H | 1.658323  | -3.063230 | 0.027768  |
| H | 1.024677  | -2.211410 | -1.382303 |

|   |           |           |           |
|---|-----------|-----------|-----------|
| H | 0.193073  | -1.782744 | 1.541681  |
| H | -0.798665 | -2.459549 | 0.238993  |
| H | -5.779523 | 0.002946  | 0.082681  |
| H | -4.572974 | -0.598391 | -2.008811 |
| H | -2.088066 | -0.757952 | -2.008254 |
| H | -2.014263 | 0.281227  | 2.160598  |
| H | -4.498153 | 0.436491  | 2.171115  |

### 1a (1a, Acetone)

$\Delta G = -635.207297$  hartree

|   |           |           |           |
|---|-----------|-----------|-----------|
| C | 2.309497  | 0.706582  | 0.267491  |
| C | 3.664815  | 0.941671  | 0.004300  |
| C | 4.505241  | -0.104909 | -0.385629 |
| C | 3.986707  | -1.396564 | -0.527662 |
| C | 2.631847  | -1.633380 | -0.279168 |
| C | 1.789825  | -0.588631 | 0.123158  |
| C | 1.346785  | 1.788493  | 0.680740  |
| C | 0.337303  | -0.856190 | 0.453782  |
| N | -0.554078 | 0.279912  | 0.188070  |
| C | 0.003114  | 1.614358  | -0.034490 |
| C | -4.714281 | -0.410882 | -0.235545 |
| C | -4.143673 | 0.800199  | -0.641030 |
| C | -2.774516 | 1.035496  | -0.511402 |
| C | -1.913883 | 0.053716  | 0.044482  |
| C | -2.504661 | -1.170981 | 0.450444  |
| C | -3.875613 | -1.389236 | 0.308210  |
| H | 4.061295  | 1.949104  | 0.104674  |
| H | 5.555246  | 0.087589  | -0.586461 |
| H | 4.630860  | -2.213411 | -0.839952 |
| H | 2.226953  | -2.635328 | -0.400046 |
| H | 1.748880  | 2.779953  | 0.450252  |
| H | 1.179923  | 1.753544  | 1.766649  |
| H | 0.264015  | -1.153836 | 1.513897  |
| H | -0.000074 | -1.719229 | -0.131620 |
| H | 0.133994  | 1.819085  | -1.109593 |
| H | -0.701384 | 2.355353  | 0.354802  |
| H | -5.780087 | -0.587451 | -0.341614 |
| H | -4.767647 | 1.576623  | -1.076315 |
| H | -2.374592 | 1.978259  | -0.864238 |
| H | -1.899936 | -1.949352 | 0.899517  |
| H | -4.289954 | -2.338744 | 0.637476  |

### 1a (TS1, Acetone)

$\Delta G = -828.332790$  hartree

|   |           |           |           |
|---|-----------|-----------|-----------|
| C | -2.179325 | -1.388959 | -0.412084 |
| C | -3.535611 | -1.721272 | -0.466486 |
| C | -4.462728 | -1.165009 | 0.425068  |
| C | -4.010681 | -0.257279 | 1.396500  |
| C | -2.664660 | 0.092110  | 1.457012  |
| C | -1.719194 | -0.456632 | 0.555318  |
| C | -1.171191 | -2.038755 | -1.333783 |
| C | -0.328652 | -0.002093 | 0.573096  |
| N | 0.610496  | -0.800027 | -0.176363 |
| C | 0.110607  | -1.209071 | -1.488672 |

|   |           |           |           |
|---|-----------|-----------|-----------|
| C | 4.771873  | -0.712383 | 0.684948  |
| C | 4.318877  | -0.885917 | -0.626617 |
| C | 2.955450  | -0.894320 | -0.927541 |
| C | 1.978657  | -0.745076 | 0.088929  |
| C | 2.453789  | -0.563806 | 1.414318  |
| C | 3.817875  | -0.548192 | 1.697263  |
| H | -3.872710 | -2.434411 | -1.217068 |
| H | -5.512812 | -1.436541 | 0.366563  |
| H | -4.711394 | 0.176271  | 2.105821  |
| H | -2.324591 | 0.798092  | 2.211257  |
| H | -1.608421 | -2.209782 | -2.325291 |
| H | -0.895319 | -3.027507 | -0.940192 |
| H | 0.034627  | 0.263065  | 1.562140  |
| H | -0.303662 | 1.314373  | 0.052424  |
| H | -0.080305 | -0.326788 | -2.120284 |
| H | 0.860318  | -1.820277 | -1.989681 |
| H | 5.833430  | -0.700106 | 0.911904  |
| H | 5.033060  | -1.000700 | -1.438285 |
| H | 2.659074  | -0.995910 | -1.964442 |
| H | 1.751745  | -0.462365 | 2.233644  |
| H | 4.136607  | -0.415643 | 2.728206  |
| C | -1.343352 | 2.698344  | -1.398210 |
| C | -0.267965 | 2.663643  | -0.300190 |
| O | -0.528910 | 3.382940  | 0.779744  |
| C | 1.154198  | 2.811621  | -0.863750 |
| H | 1.297309  | 3.833243  | -1.254930 |
| H | 1.360728  | 2.106908  | -1.678788 |
| H | 1.895514  | 2.652047  | -0.072860 |
| H | -1.401025 | 3.708511  | -1.837938 |
| H | -2.325799 | 2.462182  | -0.975290 |
| H | -1.136369 | 1.990291  | -2.211042 |

### 1a (A, Acetone)

$\Delta G = -634.578369$  hartree

|   |           |           |           |
|---|-----------|-----------|-----------|
| C | 2.285314  | 0.718915  | 0.242851  |
| C | 3.662304  | 0.912975  | 0.290350  |
| C | 4.554938  | -0.134662 | 0.011384  |
| C | 4.047668  | -1.403386 | -0.321119 |
| C | 2.677239  | -1.618704 | -0.384790 |
| C | 1.760613  | -0.563374 | -0.110315 |
| C | 1.286361  | 1.793416  | 0.595749  |
| C | 0.360731  | -0.768020 | -0.176094 |
| N | -0.543189 | 0.270696  | -0.072817 |
| C | -0.014446 | 1.639649  | -0.200742 |
| C | -4.710743 | -0.471941 | 0.059186  |
| C | -4.219743 | 0.718673  | -0.486165 |
| C | -2.848161 | 0.972965  | -0.536807 |
| C | -1.928198 | 0.033019  | -0.026252 |
| C | -2.429358 | -1.163689 | 0.530378  |
| C | -3.801803 | -1.408557 | 0.564007  |
| H | 4.050150  | 1.894876  | 0.553626  |
| H | 5.626498  | 0.035398  | 0.052338  |
| H | 4.730555  | -2.221132 | -0.535287 |
| H | 2.290683  | -2.599432 | -0.651199 |
| H | 1.699128  | 2.790703  | 0.410460  |

|   |           |           |           |
|---|-----------|-----------|-----------|
| H | 1.047614  | 1.742388  | 1.668090  |
| H | -0.045571 | -1.748256 | -0.390583 |
| H | 0.161185  | 1.867695  | -1.261730 |
| H | -0.760812 | 2.337291  | 0.179199  |
| H | -5.778371 | -0.665296 | 0.092098  |
| H | -4.906795 | 1.456559  | -0.890817 |
| H | -2.499397 | 1.890289  | -0.996622 |
| H | -1.747219 | -1.885780 | 0.965111  |
| H | -4.161624 | -2.333850 | 1.005310  |

### 1a (B, Acetone)

$\Delta G = -634.453850$  hartree

|   |           |           |           |
|---|-----------|-----------|-----------|
| C | 2.288483  | 0.716319  | 0.261567  |
| C | 3.670002  | 0.880022  | 0.291728  |
| C | 4.514062  | -0.183152 | -0.056135 |
| C | 3.991068  | -1.429845 | -0.424140 |
| C | 2.613492  | -1.615807 | -0.447044 |
| C | 1.761203  | -0.542014 | -0.116435 |
| C | 1.310931  | 1.783183  | 0.688989  |
| C | 0.338384  | -0.728905 | -0.135498 |
| N | -0.515178 | 0.259648  | -0.049432 |
| C | -0.009996 | 1.666905  | -0.064789 |
| C | -4.678143 | -0.454159 | 0.008656  |
| C | -4.154341 | 0.570325  | -0.786502 |
| C | -2.781183 | 0.817899  | -0.805708 |
| C | -1.936334 | 0.023649  | -0.022164 |
| C | -2.449204 | -0.994492 | 0.788812  |
| C | -3.824598 | -1.233255 | 0.794644  |
| H | 4.094068  | 1.835499  | 0.584981  |
| H | 5.589622  | -0.037071 | -0.036373 |
| H | 4.656186  | -2.245323 | -0.686499 |
| H | 2.189402  | -2.575343 | -0.726902 |
| H | 1.719236  | 2.781984  | 0.515137  |
| H | 1.133150  | 1.694893  | 1.769253  |
| H | -0.074170 | -1.727742 | -0.240208 |
| H | 0.107561  | 1.953056  | -1.115587 |
| H | -0.776322 | 2.293721  | 0.387656  |
| H | -5.747469 | -0.638897 | 0.021036  |
| H | -4.812476 | 1.176807  | -1.400054 |
| H | -2.378794 | 1.601149  | -1.438356 |
| H | -1.790495 | -1.572402 | 1.428600  |
| H | -4.226215 | -2.017899 | 1.427446  |

### 1a (TS3, Acetone)

$\Delta G = -1829.156241$  hartree

|   |           |           |           |
|---|-----------|-----------|-----------|
| C | -2.433812 | -1.513617 | -0.121957 |
| C | -3.818195 | -1.717048 | -0.162874 |
| C | -4.708453 | -0.657753 | 0.016355  |
| C | -4.209906 | 0.630548  | 0.240684  |
| C | -2.835403 | 0.847238  | 0.286728  |
| C | -1.927661 | -0.215384 | 0.107157  |
| C | -1.470796 | -2.660294 | -0.296913 |
| C | -0.448124 | 0.042098  | 0.151697  |
| S | 0.096195  | 1.058634  | 1.556500  |

|   |           |           |           |
|---|-----------|-----------|-----------|
| S | 1.032196  | 2.725696  | 0.448305  |
| S | -0.115804 | 2.612787  | -1.283731 |
| N | 0.377207  | -1.035959 | -0.169318 |
| C | -0.182010 | -2.166432 | -0.936946 |
| C | 4.605885  | -0.984662 | -0.023428 |
| C | 3.932200  | -0.099975 | -0.868818 |
| C | 2.534465  | -0.088347 | -0.912127 |
| C | 1.811582  | -0.966512 | -0.097905 |
| C | 2.482936  | -1.863211 | 0.744376  |
| C | 3.877746  | -1.868026 | 0.782284  |
| H | -4.196762 | -2.720732 | -0.338108 |
| H | -5.779300 | -0.833907 | -0.020592 |
| H | -4.890111 | 1.465055  | 0.381268  |
| H | -2.457561 | 1.845920  | 0.470677  |
| H | -1.910296 | -3.442283 | -0.923810 |
| H | -1.243314 | -3.116785 | 0.676097  |
| H | -0.339054 | 1.089657  | -0.850026 |
| H | -0.365020 | -1.836185 | -1.970435 |
| H | 0.576632  | -2.948866 | -0.966721 |
| H | 5.691206  | -0.989206 | 0.006777  |
| H | 4.490943  | 0.582931  | -1.501633 |
| H | 2.012880  | 0.587528  | -1.580457 |
| H | 1.910931  | -2.540461 | 1.371081  |
| H | 4.394266  | -2.556562 | 1.444048  |

### 1a (2a, Acetone)

$\Delta G = -1032.228691$  hartree

|   |           |           |           |
|---|-----------|-----------|-----------|
| C | 2.284049  | -1.006947 | -0.121728 |
| C | 3.656328  | -1.272036 | -0.068194 |
| C | 4.576218  | -0.239133 | 0.120406  |
| C | 4.124574  | 1.078236  | 0.257931  |
| C | 2.761372  | 1.355513  | 0.191986  |
| C | 1.825596  | 0.323585  | -0.001199 |
| C | 1.267675  | -2.101685 | -0.315336 |
| C | 0.367352  | 0.629922  | -0.103854 |
| S | -0.189437 | 2.190262  | -0.466477 |
| N | -0.478056 | -0.405312 | 0.087147  |
| C | 0.006200  | -1.757941 | 0.460497  |
| C | -4.695738 | -0.065606 | 0.080527  |
| C | -4.018525 | -0.405207 | -1.095282 |
| C | -2.624145 | -0.497229 | -1.101003 |
| C | -1.911998 | -0.239423 | 0.073143  |
| C | -2.581101 | 0.091556  | 1.254538  |
| C | -3.975715 | 0.179851  | 1.254375  |
| H | 4.002691  | -2.297219 | -0.167140 |
| H | 5.638256  | -0.461160 | 0.167708  |
| H | 4.832486  | 1.886015  | 0.415938  |
| H | 2.403069  | 2.373571  | 0.289810  |
| H | 1.659393  | -3.063222 | 0.029120  |
| H | 1.025463  | -2.212271 | -1.381384 |
| H | 0.193509  | -1.782710 | 1.542215  |
| H | -0.798139 | -2.460142 | 0.239776  |
| H | -5.779326 | 0.003964  | 0.082942  |
| H | -4.573380 | -0.599537 | -2.008189 |
| H | -2.088450 | -0.759003 | -2.008083 |



|   |           |          |          |
|---|-----------|----------|----------|
| H | -2.013585 | 0.284286 | 2.159523 |
| H | -4.497448 | 0.439687 | 2.170519 |

**1a (1a, CH<sub>3</sub>CN)**

**ΔG = -635.207583 hartree**

|   |           |           |           |
|---|-----------|-----------|-----------|
| C | 2.309497  | 0.706582  | 0.267491  |
| C | 3.664815  | 0.941671  | 0.004300  |
| C | 4.505241  | -0.104909 | -0.385629 |
| C | 3.986707  | -1.396564 | -0.527662 |
| C | 2.631847  | -1.633380 | -0.279168 |
| C | 1.789825  | -0.588631 | 0.123158  |
| C | 1.346785  | 1.788493  | 0.680740  |
| C | 0.337303  | -0.856190 | 0.453782  |
| N | -0.554078 | 0.279912  | 0.188070  |
| C | 0.003114  | 1.614358  | -0.034490 |
| C | -4.714281 | -0.410882 | -0.235545 |
| C | -4.143673 | 0.800199  | -0.641030 |
| C | -2.774516 | 1.035496  | -0.511402 |
| C | -1.913883 | 0.053716  | 0.044482  |
| C | -2.504661 | -1.170981 | 0.450444  |
| C | -3.875613 | -1.389236 | 0.308210  |
| H | 4.061295  | 1.949104  | 0.104674  |
| H | 5.555246  | 0.087589  | -0.586461 |
| H | 4.630860  | -2.213411 | -0.839952 |
| H | 2.226953  | -2.635328 | -0.400046 |
| H | 1.748880  | 2.779953  | 0.450252  |
| H | 1.179923  | 1.753544  | 1.766649  |
| H | 0.264015  | -1.153836 | 1.513897  |
| H | -0.000074 | -1.719229 | -0.131620 |
| H | 0.133994  | 1.819085  | -1.109593 |
| H | -0.701384 | 2.355353  | 0.354802  |
| H | -5.780087 | -0.587451 | -0.341614 |
| H | -4.767647 | 1.576623  | -1.076315 |
| H | -2.374592 | 1.978259  | -0.864238 |
| H | -1.899936 | -1.949352 | 0.899517  |
| H | -4.289954 | -2.338744 | 0.637476  |

**1a (TS1, CH<sub>3</sub>CN)**

**ΔG = -767.959107 hartree**

|   |           |           |           |
|---|-----------|-----------|-----------|
| C | 2.282541  | -1.179814 | 0.256565  |
| C | 3.659951  | -1.395116 | 0.337598  |
| C | 4.568274  | -0.625783 | -0.404513 |
| C | 4.071463  | 0.383743  | -1.245198 |
| C | 2.701730  | 0.618058  | -1.330757 |
| C | 1.771941  | -0.153041 | -0.584305 |
| C | 1.295811  | -2.042354 | 1.009056  |
| C | 0.357036  | 0.184907  | -0.608111 |
| N | -0.552818 | -0.741010 | 0.030194  |
| C | -0.031448 | -1.319174 | 1.269401  |
| C | -4.745602 | -0.427918 | -0.608440 |
| C | -4.241563 | -0.829661 | 0.632707  |
| C | -2.867149 | -0.914204 | 0.864196  |
| C | -1.929708 | -0.611664 | -0.156576 |
| C | -2.457217 | -0.198115 | -1.409238 |

|   |           |           |           |
|---|-----------|-----------|-----------|
| C | -3.831206 | -0.111307 | -1.621542 |
| H | 4.031107  | -2.186097 | 0.987541  |
| H | 5.636117  | -0.809571 | -0.329368 |
| H | 4.757293  | 0.987848  | -1.834521 |
| H | 2.329231  | 1.404568  | -1.983960 |
| H | 1.717758  | -2.368153 | 1.967651  |
| H | 1.082747  | -2.955821 | 0.435222  |
| H | 0.000085  | 0.536418  | -1.572927 |
| H | 0.191911  | 1.477525  | 0.056235  |
| H | 0.107104  | -0.537973 | 2.035369  |
| H | -0.748290 | -2.042074 | 1.658608  |
| H | -5.815166 | -0.357921 | -0.780738 |
| H | -4.922995 | -1.067618 | 1.445782  |
| H | -2.530309 | -1.196930 | 1.853799  |
| H | -1.789832 | 0.032731  | -2.231035 |
| H | -4.190303 | 0.201613  | -2.598896 |
| C | 0.310634  | 2.659904  | 2.070535  |
| C | -0.013541 | 2.723578  | 0.578226  |
| N | -0.368423 | 3.658094  | -0.136294 |
| H | 0.230467  | 3.649018  | 2.539469  |
| H | 1.325368  | 2.272106  | 2.221506  |
| H | -0.375290 | 1.968515  | 2.575341  |

**1a (A, CH<sub>3</sub>CN)**

**ΔG = -634.593630 hartree**

|   |           |           |           |
|---|-----------|-----------|-----------|
| C | 2.285347  | 0.719027  | 0.242671  |
| C | 3.662428  | 0.912911  | 0.289971  |
| C | 4.554967  | -0.134953 | 0.011139  |
| C | 4.047486  | -1.403776 | -0.320992 |
| C | 2.676964  | -1.618954 | -0.384496 |
| C | 1.760456  | -0.563353 | -0.110241 |
| C | 1.286602  | 1.793786  | 0.595521  |
| C | 0.360522  | -0.767880 | -0.175855 |
| N | -0.543189 | 0.270969  | -0.072512 |
| C | -0.014405 | 1.639997  | -0.200615 |
| C | -4.710681 | -0.472204 | 0.058972  |
| C | -4.219790 | 0.718746  | -0.485923 |
| C | -2.848198 | 0.973251  | -0.536420 |
| C | -1.928205 | 0.033201  | -0.026041 |
| C | -2.429207 | -1.163839 | 0.530137  |
| C | -3.801655 | -1.408967 | 0.563530  |
| H | 4.050395  | 1.894825  | 0.552993  |
| H | 5.626560  | 0.034989  | 0.051959  |
| H | 4.730245  | -2.221679 | -0.535008 |
| H | 2.290263  | -2.599723 | -0.650581 |
| H | 1.699413  | 2.790958  | 0.409922  |
| H | 1.048116  | 1.743084  | 1.667931  |
| H | -0.045920 | -1.748191 | -0.389831 |
| H | 0.160997  | 1.867976  | -1.261631 |
| H | -0.760497 | 2.337867  | 0.179357  |
| H | -5.778289 | -0.665721 | 0.091716  |
| H | -4.906904 | 1.456723  | -0.890295 |
| H | -2.499502 | 1.890831  | -0.995768 |
| H | -1.746949 | -1.886144 | 0.964354  |
| H | -4.161388 | -2.334541 | 1.004321  |

**1a (B, CH<sub>3</sub>CN)** $\Delta G = -634.461313$  hartree

|   |           |           |           |
|---|-----------|-----------|-----------|
| C | 2.288312  | 0.716696  | 0.261051  |
| C | 3.669955  | 0.879841  | 0.293250  |
| C | 4.514092  | -0.183547 | -0.053665 |
| C | 3.991142  | -1.429920 | -0.422900 |
| C | 2.613475  | -1.615327 | -0.447834 |
| C | 1.761257  | -0.541326 | -0.117976 |
| C | 1.310595  | 1.783726  | 0.687634  |
| C | 0.338327  | -0.728360 | -0.137642 |
| N | -0.515200 | 0.259979  | -0.050927 |
| C | -0.010108 | 1.667257  | -0.066456 |
| C | -4.678067 | -0.454942 | 0.010300  |
| C | -4.155565 | 0.572908  | -0.781393 |
| C | -2.782459 | 0.820835  | -0.801550 |
| C | -1.936198 | 0.023576  | -0.022586 |
| C | -2.447772 | -0.997917 | 0.785089  |
| C | -3.823124 | -1.236994 | 0.791888  |
| H | 4.093961  | 1.835029  | 0.587521  |
| H | 5.589690  | -0.037916 | -0.032177 |
| H | 4.656298  | -2.245621 | -0.684519 |
| H | 2.189157  | -2.574486 | -0.728564 |
| H | 1.718848  | 2.782441  | 0.513263  |
| H | 1.132516  | 1.695774  | 1.767837  |
| H | -0.073720 | -1.727265 | -0.242783 |
| H | 0.107844  | 1.952869  | -1.117320 |
| H | -0.776422 | 2.294230  | 0.385687  |
| H | -5.747351 | -0.639974 | 0.023459  |
| H | -4.814639 | 1.181862  | -1.391500 |
| H | -2.381251 | 1.606955  | -1.431324 |
| H | -1.788143 | -1.578450 | 1.421544  |
| H | -4.223559 | -2.024327 | 1.422111  |

**1a (TS3, CH<sub>3</sub>CN)** $\Delta G = -1829.170628$  hartree

|   |           |           |           |
|---|-----------|-----------|-----------|
| C | -2.433012 | -1.514161 | -0.122341 |
| C | -3.817385 | -1.718197 | -0.162148 |
| C | -4.708018 | -0.659383 | 0.018223  |
| C | -4.209962 | 0.629153  | 0.242562  |
| C | -2.835473 | 0.846401  | 0.287526  |
| C | -1.927427 | -0.215773 | 0.106974  |
| C | -1.469646 | -2.660278 | -0.298661 |
| C | -0.447831 | 0.042270  | 0.151022  |
| S | 0.096539  | 1.058076  | 1.556188  |
| S | 1.028945  | 2.728774  | 0.448682  |
| S | -0.115974 | 2.612214  | -1.285496 |
| N | 0.377753  | -1.035030 | -0.171204 |
| C | -0.181386 | -2.165587 | -0.939048 |
| C | 4.606219  | -0.985022 | -0.021055 |
| C | 3.933582  | -0.099959 | -0.866987 |
| C | 2.535874  | -0.087933 | -0.911562 |
| C | 1.812047  | -0.966127 | -0.098160 |
| C | 2.482237  | -1.863442 | 0.744419  |

|   |           |           |           |
|---|-----------|-----------|-----------|
| C | 3.877057  | -1.868467 | 0.783694  |
| H | -4.195575 | -2.721978 | -0.337488 |
| H | -5.778798 | -0.836062 | -0.017895 |
| H | -4.890487 | 1.463258  | 0.383991  |
| H | -2.457984 | 1.845233  | 0.471495  |
| H | -1.909070 | -3.441838 | -0.926067 |
| H | -1.241620 | -3.117526 | 0.673823  |
| H | -0.338856 | 1.088804  | -0.849843 |
| H | -0.364749 | -1.834565 | -1.972168 |
| H | 0.577551  | -2.947643 | -0.969461 |
| H | 5.691505  | -0.990051 | 0.009994  |
| H | 4.493178  | 0.582550  | -1.499485 |
| H | 2.014958  | 0.587826  | -1.580540 |
| H | 1.909511  | -2.541223 | 1.369866  |
| H | 4.392759  | -2.557580 | 1.445473  |

**1a (2a, CH<sub>3</sub>CN)** $\Delta G = -1032.237217$  hartree

|   |           |           |           |
|---|-----------|-----------|-----------|
| C | 2.283596  | -1.007150 | -0.122118 |
| C | 3.655810  | -1.272620 | -0.068912 |
| C | 4.576066  | -0.240064 | 0.120183  |
| C | 4.124946  | 1.077423  | 0.258620  |
| C | 2.761810  | 1.355106  | 0.192977  |
| C | 1.825639  | 0.323502  | -0.000743 |
| C | 1.266951  | -2.101459 | -0.316227 |
| C | 0.367521  | 0.630305  | -0.103125 |
| S | -0.188581 | 2.191171  | -0.466482 |
| N | -0.478083 | -0.404708 | 0.087357  |
| C | 0.005817  | -1.757666 | 0.459998  |
| C | -4.695882 | -0.065725 | 0.080258  |
| C | -4.018321 | -0.404053 | -1.095790 |
| C | -2.623882 | -0.496002 | -1.101279 |
| C | -1.912028 | -0.238879 | 0.073248  |
| C | -2.581478 | 0.090307  | 1.255029  |
| C | -3.976143 | 0.178494  | 1.254615  |
| H | 4.001794  | -2.297849 | -0.168347 |
| H | 5.638009  | -0.462483 | 0.167416  |
| H | 4.833134  | 1.884829  | 0.417312  |
| H | 2.403990  | 2.373228  | 0.291973  |
| H | 1.658323  | -3.063230 | 0.027768  |
| H | 1.024677  | -2.211410 | -1.382303 |
| H | 0.193073  | -1.782744 | 1.541681  |
| H | -0.798665 | -2.459549 | 0.238993  |
| H | -5.779523 | 0.002946  | 0.082681  |
| H | -4.572974 | -0.598391 | -2.008811 |
| H | -2.088066 | -0.757952 | -2.008254 |
| H | -2.014263 | 0.281227  | 2.160598  |
| H | -4.498153 | 0.436491  | 2.171115  |

**1b (1b, DMPU)** $\Delta G = -595.921461$  hartree

|   |          |           |           |
|---|----------|-----------|-----------|
| C | 1.874074 | -0.698599 | -0.000007 |
| C | 3.073007 | -1.411733 | 0.000013  |
| C | 4.279280 | -0.700793 | 0.000051  |

|   |           |           |           |
|---|-----------|-----------|-----------|
| C | 4.279284  | 0.700784  | 0.000068  |
| C | 3.073014  | 1.411730  | 0.000046  |
| C | 1.874077  | 0.698602  | 0.000008  |
| C | 0.461894  | -1.225094 | -0.000023 |
| C | 0.461900  | 1.225104  | -0.000008 |
| N | -0.341879 | 0.000006  | -0.000272 |
| C | -4.561059 | -0.000008 | 0.000124  |
| C | -3.845276 | -1.202537 | 0.000082  |
| C | -2.450303 | -1.213625 | -0.000032 |
| C | -1.717778 | 0.000006  | -0.000117 |
| C | -2.450316 | 1.213631  | -0.000067 |
| C | -3.845289 | 1.202528  | 0.000049  |
| H | 3.075953  | -2.498361 | -0.000002 |
| H | 5.222140  | -1.239894 | 0.000063  |
| H | 5.222146  | 1.239881  | 0.000095  |
| H | 3.075965  | 2.498358  | 0.000057  |
| H | 0.253794  | -1.845156 | 0.885496  |
| H | 0.253885  | -1.845436 | -0.885355 |
| H | 0.253907  | 1.845452  | -0.885340 |
| H | 0.253792  | 1.845162  | 0.885510  |
| H | -5.646561 | -0.000013 | 0.000215  |
| H | -4.376517 | -2.150858 | 0.000144  |
| H | -1.928916 | -2.164128 | -0.000064 |
| H | -1.928940 | 2.164139  | -0.000127 |
| H | -4.376540 | 2.150844  | 0.000083  |

### 1b (TS1, DMPU)

$\Delta G = -1016.395527$  hartree

|   |           |           |           |
|---|-----------|-----------|-----------|
| C | -2.908771 | 0.497373  | 0.382272  |
| C | -4.200269 | 0.228333  | 0.818970  |
| C | -4.885683 | -0.874919 | 0.281952  |
| C | -4.266236 | -1.679917 | -0.687120 |
| C | -2.965224 | -1.411460 | -1.123314 |
| C | -2.272181 | -0.315621 | -0.580139 |
| C | -1.991322 | 1.631844  | 0.762998  |
| C | -0.904999 | 0.154496  | -0.812295 |
| N | -0.839095 | 1.429087  | -0.126078 |
| C | 2.198155  | 4.333445  | -0.561587 |
| C | 1.157007  | 4.513932  | 0.356639  |
| C | 0.156485  | 3.554655  | 0.515305  |
| C | 0.161455  | 2.362551  | -0.257332 |
| C | 1.228079  | 2.184590  | -1.178548 |
| C | 2.217292  | 3.155560  | -1.320354 |
| H | -4.682337 | 0.865418  | 1.556905  |
| H | -5.896574 | -1.098639 | 0.609943  |
| H | -4.805977 | -2.525322 | -1.106031 |
| H | -2.498969 | -2.046545 | -1.871442 |
| H | -1.695882 | 1.600346  | 1.824736  |
| H | -2.452591 | 2.614912  | 0.588985  |
| H | -0.552184 | 0.188993  | -1.844466 |
| H | -0.003208 | -0.810685 | -0.255552 |
| H | 2.974128  | 5.083624  | -0.678368 |
| H | 1.119621  | 5.413754  | 0.965811  |
| H | -0.626235 | 3.728929  | 1.244682  |
| H | 1.284971  | 1.279999  | -1.771518 |

|   |           |           |           |
|---|-----------|-----------|-----------|
| H | 3.018489  | 2.984240  | -2.035223 |
| N | 1.607590  | -1.060369 | 1.267361  |
| C | 0.768515  | -0.774404 | 2.424690  |
| C | 0.861694  | -1.803508 | 0.215928  |
| O | 0.156817  | -2.840592 | 0.585365  |
| N | 1.763636  | -1.960360 | -0.960081 |
| C | 1.087780  | -2.611259 | -2.076795 |
| C | 3.006272  | -2.673143 | -0.630465 |
| C | 3.761595  | -1.946148 | 0.478836  |
| C | 2.845167  | -1.735816 | 1.681108  |
| H | -0.149648 | -0.276284 | 2.103566  |
| H | 1.305204  | -0.100394 | 3.103027  |
| H | 0.483201  | -1.678229 | 2.990873  |
| H | 0.157278  | -2.087128 | -2.311021 |
| H | 0.836564  | -3.667787 | -1.878319 |
| H | 1.733826  | -2.572947 | -2.962001 |
| H | 3.620924  | -2.733059 | -1.538020 |
| H | 2.796548  | -3.715264 | -0.315431 |
| H | 4.109717  | -0.973144 | 0.109576  |
| H | 4.643761  | -2.526780 | 0.774889  |
| H | 3.341154  | -1.113358 | 2.437118  |
| H | 2.629909  | -2.711930 | 2.161451  |

### 1b (A, DMPU)

$\Delta G = -595.298362$  hartree

|   |           |           |           |
|---|-----------|-----------|-----------|
| C | -1.885833 | -0.702590 | 0.004782  |
| C | -3.084115 | -1.396184 | 0.012551  |
| C | -4.290289 | -0.668750 | 0.009610  |
| C | -4.269725 | 0.737518  | -0.001713 |
| C | -3.068552 | 1.446265  | -0.010008 |
| C | -1.855391 | 0.720825  | -0.006636 |
| C | -0.466678 | -1.212366 | 0.003384  |
| C | -0.504506 | 1.139100  | -0.013535 |
| N | 0.331953  | 0.032587  | -0.006319 |
| C | 4.556244  | 0.004292  | 0.003601  |
| C | 3.831895  | -1.192155 | -0.010432 |
| C | 2.436724  | -1.187828 | -0.013409 |
| C | 1.723674  | 0.032359  | -0.002297 |
| C | 2.460173  | 1.239920  | 0.013602  |
| C | 3.853580  | 1.215333  | 0.015805  |
| H | -3.101214 | -2.483028 | 0.020817  |
| H | -5.239165 | -1.196113 | 0.015981  |
| H | -5.209403 | 1.283314  | -0.003897 |
| H | -3.065728 | 2.532358  | -0.018327 |
| H | -0.235793 | -1.822288 | -0.880507 |
| H | -0.228375 | -1.812281 | 0.892085  |
| H | -0.116797 | 2.144592  | -0.029299 |
| H | 5.641547  | -0.005348 | 0.005616  |
| H | 4.353604  | -2.145099 | -0.019700 |
| H | 1.907508  | -2.133226 | -0.025464 |
| H | 1.952590  | 2.196953  | 0.026673  |
| H | 4.394351  | 2.157621  | 0.028438  |

### 1b (B, DMPU)

**$\Delta G = -595.161491$  hartree**

|   |           |           |           |
|---|-----------|-----------|-----------|
| C | 1.895061  | -0.704118 | 0.186753  |
| C | 3.114645  | -1.341329 | 0.372494  |
| C | 4.279464  | -0.585742 | 0.183467  |
| C | 4.232475  | 0.770898  | -0.187171 |
| C | 3.013190  | 1.414577  | -0.378197 |
| C | 1.848081  | 0.658361  | -0.182502 |
| C | 0.489854  | -1.212760 | 0.296410  |
| C | 0.467893  | 1.013542  | -0.309397 |
| N | -0.313994 | -0.010141 | -0.045350 |
| C | -4.528350 | 0.054947  | 0.015924  |
| C | -3.852936 | -1.072144 | -0.461831 |
| C | -2.458018 | -1.103226 | -0.483710 |
| C | -1.744912 | 0.007774  | -0.018768 |
| C | -2.409749 | 1.136195  | 0.476715  |
| C | -3.804482 | 1.156233  | 0.483437  |
| H | 3.172522  | -2.386887 | 0.655563  |
| H | 5.245240  | -1.060174 | 0.326315  |
| H | 5.158912  | 1.317963  | -0.325492 |
| H | 2.963165  | 2.459179  | -0.665975 |
| H | 0.213980  | -1.547779 | 1.301036  |
| H | 0.270794  | -2.017884 | -0.410865 |
| H | 0.056336  | 1.973223  | -0.598007 |
| H | -5.613326 | 0.072551  | 0.029835  |
| H | -4.409163 | -1.929138 | -0.827130 |
| H | -1.941942 | -1.971377 | -0.877360 |
| H | -1.849612 | 1.974352  | 0.877367  |
| H | -4.322244 | 2.027714  | 0.870427  |

**1b (TS3, DMPU)** **$\Delta G = -1789.884316$  hartree**

|   |           |           |           |
|---|-----------|-----------|-----------|
| C | 1.594359  | -1.911891 | 0.190698  |
| C | 2.695156  | -2.744309 | 0.374649  |
| C | 3.974553  | -2.186543 | 0.266512  |
| C | 4.139687  | -0.824665 | -0.031048 |
| C | 3.033683  | 0.007123  | -0.220737 |
| C | 1.756907  | -0.552883 | -0.103922 |
| C | 0.133232  | -2.242986 | 0.214571  |
| C | 0.428723  | 0.086857  | -0.215107 |
| S | 0.101410  | 1.314802  | -1.513747 |
| S | 0.869484  | 3.047459  | -0.427892 |
| S | 0.302665  | 2.488903  | 1.517243  |
| N | -0.517561 | -0.939272 | -0.047790 |
| C | -4.732808 | -0.659538 | 0.103598  |
| C | -4.107222 | -1.872360 | -0.199327 |
| C | -2.716604 | -1.959862 | -0.254431 |
| C | -1.921955 | -0.822990 | -0.004221 |
| C | -2.554513 | 0.395452  | 0.310964  |
| C | -3.945686 | 0.467772  | 0.360471  |
| H | 0.363667  | 1.034984  | 0.931669  |
| H | 2.568663  | -3.800581 | 0.593053  |
| H | 4.848169  | -2.814765 | 0.410834  |
| H | 5.140408  | -0.412059 | -0.115500 |
| H | 3.161600  | 1.058938  | -0.453517 |
| H | -0.214917 | -2.642806 | 1.174058  |

|   |           |           |           |
|---|-----------|-----------|-----------|
| H | -0.128671 | -2.965790 | -0.568030 |
| H | -5.815497 | -0.595124 | 0.145367  |
| H | -4.700496 | -2.759139 | -0.400190 |
| H | -2.260364 | -2.909769 | -0.504351 |
| H | -1.967104 | 1.273201  | 0.542681  |
| H | -4.414567 | 1.414132  | 0.612764  |

**1b (2b, DMPU)** **$\Delta G = -992.946077$  hartree**

|   |           |           |           |
|---|-----------|-----------|-----------|
| C | -1.882548 | -1.056587 | 0.000266  |
| C | -3.081848 | -1.764691 | 0.000451  |
| C | -4.277256 | -1.036560 | 0.000323  |
| C | -4.271527 | 0.368379  | 0.000012  |
| C | -3.068208 | 1.075127  | -0.000193 |
| C | -1.876980 | 0.345303  | -0.000065 |
| C | -0.464092 | -1.544812 | 0.000349  |
| C | -0.481420 | 0.821751  | -0.000242 |
| S | 0.039458  | 2.421428  | -0.000802 |
| N | 0.302565  | -0.282933 | 0.000026  |
| C | 4.523347  | -0.396670 | 0.000197  |
| C | 3.824573  | -0.372210 | 1.211482  |
| C | 2.428005  | -0.324203 | 1.215114  |
| C | 1.736886  | -0.297832 | 0.000068  |
| C | 2.428032  | -0.326585 | -1.214905 |
| C | 3.824606  | -0.374598 | -1.211149 |
| H | -3.095785 | -2.850456 | 0.000686  |
| H | -5.225191 | -1.566266 | 0.000466  |
| H | -5.213846 | 0.907444  | -0.000070 |
| H | -3.047822 | 2.160169  | -0.000436 |
| H | -0.211608 | -2.137919 | -0.886806 |
| H | -0.211556 | -2.137472 | 0.887787  |
| H | 5.608505  | -0.434075 | 0.000249  |
| H | 4.364123  | -0.390752 | 2.153478  |
| H | 1.875124  | -0.304346 | 2.149035  |
| H | 1.875190  | -0.308521 | -2.148888 |
| H | 4.364174  | -0.394986 | -2.153095 |

**1b (1b, DMF)** **$\Delta G = -595.921485$  hartree**

|   |           |           |           |
|---|-----------|-----------|-----------|
| C | 1.874074  | -0.698599 | -0.000007 |
| C | 3.073007  | -1.411733 | 0.000013  |
| C | 4.279280  | -0.700793 | 0.000051  |
| C | 4.279284  | 0.700784  | 0.000068  |
| C | 3.073014  | 1.411730  | 0.000046  |
| C | 1.874077  | 0.698602  | 0.000008  |
| C | 0.461894  | -1.225094 | -0.000023 |
| C | 0.461900  | 1.225104  | -0.000008 |
| N | -0.341879 | 0.000006  | -0.000272 |
| C | -4.561059 | -0.000008 | 0.000124  |
| C | -3.845276 | -1.202537 | 0.000082  |
| C | -2.450303 | -1.213625 | -0.000032 |
| C | -1.717778 | 0.000006  | -0.000117 |
| C | -2.450316 | 1.213631  | -0.000067 |
| C | -3.845289 | 1.202528  | 0.000049  |

|   |           |           |           |
|---|-----------|-----------|-----------|
| H | 3.075953  | -2.498361 | -0.000002 |
| H | 5.222140  | -1.239894 | 0.000063  |
| H | 5.222146  | 1.239881  | 0.000095  |
| H | 3.075965  | 2.498358  | 0.000057  |
| H | 0.253794  | -1.845156 | 0.885496  |
| H | 0.253885  | -1.845436 | -0.885355 |
| H | 0.253907  | 1.845452  | -0.885340 |
| H | 0.253792  | 1.845162  | 0.885510  |
| H | -5.646561 | -0.000013 | 0.000215  |
| H | -4.376517 | -2.150858 | 0.000144  |
| H | -1.928916 | -2.164128 | -0.000064 |
| H | -1.928940 | 2.164139  | -0.000127 |
| H | -4.376540 | 2.150844  | 0.000083  |

### 1b (TS1, DMF)

$\Delta G = -844.382308$  hartree

|   |           |           |           |
|---|-----------|-----------|-----------|
| N | 1.097204  | 2.837611  | 0.943713  |
| C | 2.487538  | 2.931815  | 0.518998  |
| C | 0.932518  | 2.006963  | 2.128793  |
| C | 0.145949  | 2.521462  | -0.130581 |
| O | 0.256870  | 3.187423  | -1.253856 |
| H | 2.550373  | 3.577701  | -0.358769 |
| H | 2.923254  | 1.948703  | 0.257946  |
| H | 3.089969  | 3.366647  | 1.324746  |
| H | 1.281779  | 0.967944  | 1.984225  |
| H | -0.125246 | 1.972907  | 2.411647  |
| H | 1.494699  | 2.435373  | 2.966254  |
| H | -0.862844 | 2.493165  | 0.346321  |
| C | 1.374244  | -1.843817 | 0.258319  |
| C | 2.461259  | -2.601455 | 0.671488  |
| C | 3.717860  | -2.376491 | 0.076437  |
| C | 3.853813  | -1.396287 | -0.919915 |
| C | 2.760713  | -0.629820 | -1.335918 |
| C | 1.502379  | -0.854658 | -0.744601 |
| C | -0.063784 | -1.904869 | 0.711275  |
| C | 0.233574  | -0.174575 | -0.938039 |
| N | -0.726260 | -0.944747 | -0.184546 |
| C | -4.890336 | -0.247277 | -0.081417 |
| C | -4.304582 | -1.217901 | 0.740061  |
| C | -2.928600 | -1.447443 | 0.722238  |
| C | -2.078820 | -0.702357 | -0.138164 |
| C | -2.681170 | 0.286605  | -0.961692 |
| C | -4.057576 | 0.498722  | -0.927345 |
| H | 2.347873  | -3.367920 | 1.434892  |
| H | 4.578460  | -2.962374 | 0.385502  |
| H | 4.825729  | -1.231194 | -1.378446 |
| H | 2.882488  | 0.123119  | -2.110000 |
| H | -0.185412 | -1.613460 | 1.767939  |
| H | -0.496862 | -2.909932 | 0.603613  |
| H | -0.073992 | 0.088733  | -1.951725 |
| H | 0.277199  | 1.196498  | -0.409099 |
| H | -5.961588 | -0.072692 | -0.060086 |
| H | -4.924475 | -1.807589 | 1.411040  |
| H | -2.512601 | -2.205440 | 1.375894  |
| H | -2.065718 | 0.893524  | -1.615185 |

|   |           |          |           |
|---|-----------|----------|-----------|
| H | -4.484530 | 1.265150 | -1.569656 |
|---|-----------|----------|-----------|

### 1b (A, DMF)

$\Delta G = -595.301827$  hartree

|   |           |           |           |
|---|-----------|-----------|-----------|
| C | -1.885833 | -0.702590 | 0.004782  |
| C | -3.084115 | -1.396184 | 0.012551  |
| C | -4.290289 | -0.668750 | 0.009610  |
| C | -4.269725 | 0.737518  | -0.001713 |
| C | -3.068552 | 1.446265  | -0.010008 |
| C | -1.855391 | 0.720825  | -0.006636 |
| C | -0.466678 | -1.212366 | 0.003384  |
| C | -0.504506 | 1.139100  | -0.013535 |
| N | 0.331953  | 0.032587  | -0.006319 |
| C | 4.556244  | 0.004292  | 0.003601  |
| C | 3.831895  | -1.192155 | -0.010432 |
| C | 2.436724  | -1.187828 | -0.013409 |
| C | 1.723674  | 0.032359  | -0.002297 |
| C | 2.460173  | 1.239920  | 0.013602  |
| C | 3.853580  | 1.215333  | 0.015805  |
| H | -3.101214 | -2.483028 | 0.020817  |
| H | -5.239165 | -1.196113 | 0.015981  |
| H | -5.209403 | 1.283314  | -0.003897 |
| H | -3.065728 | 2.532358  | -0.018327 |
| H | -0.235793 | -1.822288 | -0.880507 |
| H | -0.228375 | -1.812281 | 0.892085  |
| H | -0.116797 | 2.144592  | -0.029299 |
| H | 5.641547  | -0.005348 | 0.005616  |
| H | 4.353604  | -2.145099 | -0.019700 |
| H | 1.907508  | -2.133226 | -0.025464 |
| H | 1.952590  | 2.196953  | 0.026673  |
| H | 4.394351  | 2.157621  | 0.028438  |

### 1b (B, DMF)

$\Delta G = -595.165627$  hartree

|   |           |           |           |
|---|-----------|-----------|-----------|
| C | 1.895061  | -0.704118 | 0.186753  |
| C | 3.114645  | -1.341329 | 0.372494  |
| C | 4.279464  | -0.585742 | 0.183467  |
| C | 4.232475  | 0.770898  | -0.187171 |
| C | 3.013190  | 1.414577  | -0.378197 |
| C | 1.848081  | 0.658361  | -0.182502 |
| C | 0.489854  | -1.212760 | 0.296410  |
| C | 0.467893  | 1.013542  | -0.309397 |
| N | -0.313994 | -0.010141 | -0.045350 |
| C | -4.528350 | 0.054947  | 0.015924  |
| C | -3.852936 | -1.072144 | -0.461831 |
| C | -2.458018 | -1.103226 | -0.483710 |
| C | -1.744912 | 0.007774  | -0.018768 |
| C | -2.409749 | 1.136195  | 0.476715  |
| C | -3.804482 | 1.156233  | 0.483437  |
| H | 3.172522  | -2.386887 | 0.655563  |
| H | 5.245240  | -1.060174 | 0.326315  |
| H | 5.158912  | 1.317963  | -0.325492 |
| H | 2.963165  | 2.459179  | -0.665975 |
| H | 0.213980  | -1.547779 | 1.301036  |

|   |           |           |           |
|---|-----------|-----------|-----------|
| H | 0.270794  | -2.017884 | -0.410865 |
| H | 0.056336  | 1.973223  | -0.598007 |
| H | -5.613326 | 0.072551  | 0.029835  |
| H | -4.409163 | -1.929138 | -0.827130 |
| H | -1.941942 | -1.971377 | -0.877360 |
| H | -1.849612 | 1.974352  | 0.877367  |
| H | -4.322244 | 2.027714  | 0.870427  |

### 1b (TS3, DMF)

$\Delta G = -1789.887326$  hartree

|   |           |           |           |
|---|-----------|-----------|-----------|
| C | 1.594359  | -1.911891 | 0.190698  |
| C | 2.695156  | -2.744309 | 0.374649  |
| C | 3.974553  | -2.186543 | 0.266512  |
| C | 4.139687  | -0.824665 | -0.031048 |
| C | 3.033683  | 0.007123  | -0.220737 |
| C | 1.756907  | -0.552883 | -0.103922 |
| C | 0.133232  | -2.242986 | 0.214571  |
| C | 0.428723  | 0.086857  | -0.215107 |
| S | 0.101410  | 1.314802  | -1.513747 |
| S | 0.869484  | 3.047459  | -0.427892 |
| S | 0.302665  | 2.488903  | 1.517243  |
| N | -0.517561 | -0.939272 | -0.047790 |
| C | -4.732808 | -0.659538 | 0.103598  |
| C | -4.107222 | -1.872360 | -0.199327 |
| C | -2.716604 | -1.959862 | -0.254431 |
| C | -1.921955 | -0.822990 | -0.004221 |
| C | -2.554513 | 0.395452  | 0.310964  |
| C | -3.945686 | 0.467772  | 0.360471  |
| H | 0.363667  | 1.034984  | 0.931669  |
| H | 2.568663  | -3.800581 | 0.593053  |
| H | 4.848169  | -2.814765 | 0.410834  |
| H | 5.140408  | -0.412059 | -0.115500 |
| H | 3.161600  | 1.058938  | -0.453517 |
| H | -0.214917 | -2.642806 | 1.174058  |
| H | -0.128671 | -2.965790 | -0.568030 |
| H | -5.815497 | -0.595124 | 0.145367  |
| H | -4.700496 | -2.759139 | -0.400190 |
| H | -2.260364 | -2.909769 | -0.504351 |
| H | -1.967104 | 1.273201  | 0.542681  |
| H | -4.414567 | 1.414132  | 0.612764  |

### 1b (2b, DMF)

$\Delta G = -992.946123$  hartree

|   |           |           |           |
|---|-----------|-----------|-----------|
| C | -1.882548 | -1.056587 | 0.000266  |
| C | -3.081848 | -1.764691 | 0.000451  |
| C | -4.277256 | -1.036560 | 0.000323  |
| C | -4.271527 | 0.368379  | 0.000012  |
| C | -3.068208 | 1.075127  | -0.000193 |
| C | -1.876980 | 0.345303  | -0.000065 |
| C | -0.464092 | -1.544812 | 0.000349  |
| C | -0.481420 | 0.821751  | -0.000242 |
| S | 0.039458  | 2.421428  | -0.000802 |
| N | 0.302565  | -0.282933 | 0.000026  |
| C | 4.523347  | -0.396670 | 0.000197  |

|   |           |           |           |
|---|-----------|-----------|-----------|
| C | 3.824573  | -0.372210 | 1.211482  |
| C | 2.428005  | -0.324203 | 1.215114  |
| C | 1.736886  | -0.297832 | 0.000068  |
| C | 2.428032  | -0.326585 | -1.214905 |
| C | 3.824606  | -0.374598 | -1.211149 |
| H | -3.095785 | -2.850456 | 0.000686  |
| H | -5.225191 | -1.566266 | 0.000466  |
| H | -5.213846 | 0.907444  | -0.000070 |
| H | -3.047822 | 2.160169  | -0.000436 |
| H | -0.211608 | -2.137919 | -0.886806 |
| H | -0.211556 | -2.137472 | 0.887787  |
| H | 5.608505  | -0.434075 | 0.000249  |
| H | 4.364123  | -0.390752 | 2.153478  |
| H | 1.875124  | -0.304346 | 2.149035  |
| H | 1.875190  | -0.308521 | -2.148888 |
| H | 4.364174  | -0.394986 | -2.153095 |

### 1c (1c, DMPU)

$\Delta G = -405.397051$  hartree

|   |           |           |           |
|---|-----------|-----------|-----------|
| C | 0.903899  | 1.180241  | -0.102646 |
| C | 2.247230  | 1.306324  | 0.258128  |
| C | 3.077213  | 0.178450  | 0.286727  |
| C | 2.551694  | -1.072232 | -0.047599 |
| C | 1.203460  | -1.193280 | -0.405726 |
| C | 0.364062  | -0.071982 | -0.438239 |
| C | -2.027062 | -0.588270 | 1.352172  |
| C | -1.089667 | -0.195311 | -0.854888 |
| N | -2.034274 | 0.271429  | 0.169236  |
| C | -3.383775 | 0.387404  | -0.381106 |
| H | 0.263466  | 2.057815  | -0.123207 |
| H | 2.648717  | 2.283154  | 0.513479  |
| H | 4.122291  | 0.275937  | 0.566536  |
| H | 3.186088  | -1.953986 | -0.027191 |
| H | 0.800216  | -2.170247 | -0.661167 |
| H | -2.703712 | -0.177391 | 2.107502  |
| H | -2.350896 | -1.622482 | 1.124630  |
| H | -1.021922 | -0.631892 | 1.779430  |
| H | -1.298144 | -1.243864 | -1.143167 |
| H | -1.257172 | 0.416420  | -1.749601 |
| H | -4.059761 | 0.780513  | 0.384386  |
| H | -3.382753 | 1.080472  | -1.228063 |
| H | -3.788824 | -0.582519 | -0.729157 |

### 1c (TS1, DMPU)

$\Delta G = -825.869535$  hartree

|   |           |           |           |
|---|-----------|-----------|-----------|
| C | -2.523679 | -0.593159 | 0.784525  |
| C | -3.170281 | -1.825701 | 0.877172  |
| C | -3.149443 | -2.730826 | -0.193566 |
| C | -2.468021 | -2.371659 | -1.367153 |
| C | -1.825948 | -1.139027 | -1.464706 |
| C | -1.827682 | -0.212044 | -0.391040 |
| C | -2.886597 | 2.615630  | -0.043871 |
| C | -1.091056 | 1.045296  | -0.503222 |
| N | -1.538909 | 2.157733  | 0.312502  |

|   |           |           |           |
|---|-----------|-----------|-----------|
| C | -0.600506 | 3.279756  | 0.255884  |
| H | -2.545589 | 0.093288  | 1.625165  |
| H | -3.696275 | -2.084540 | 1.793401  |
| H | -3.655974 | -3.688851 | -0.119069 |
| H | -2.445435 | -3.055496 | -2.212451 |
| H | -1.309893 | -0.875153 | -2.385318 |
| H | -3.193127 | 3.418373  | 0.636740  |
| H | -2.932169 | 3.007531  | -1.078952 |
| H | -3.605467 | 1.797882  | 0.043855  |
| H | -0.885856 | 1.324466  | -1.551303 |
| H | 0.304909  | 0.795842  | -0.078635 |
| H | -0.925374 | 4.064453  | 0.948435  |
| H | 0.402165  | 2.944863  | 0.531742  |
| H | -0.553093 | 3.727175  | -0.758413 |
| N | 2.067878  | 0.009891  | -1.099936 |
| C | 2.240486  | 1.096028  | -2.058825 |
| C | 1.596376  | 0.515799  | 0.223414  |
| O | 2.198257  | 1.567215  | 0.718208  |
| N | 1.399410  | -0.655405 | 1.119659  |
| C | 0.847075  | -0.257364 | 2.408687  |
| C | 2.616234  | -1.455918 | 1.296809  |
| C | 3.119788  | -1.957934 | -0.053348 |
| C | 3.302708  | -0.781318 | -1.007437 |
| H | 1.330691  | 1.698942  | -2.113142 |
| H | 2.432419  | 0.673052  | -3.052275 |
| H | 3.077323  | 1.769195  | -1.803090 |
| H | -0.050350 | 0.346861  | 2.254065  |
| H | 1.553445  | 0.328963  | 3.022961  |
| H | 0.566073  | -1.154434 | 2.973641  |
| H | 2.380324  | -2.300588 | 1.956973  |
| H | 3.414892  | -0.871674 | 1.797861  |
| H | 2.393323  | -2.663589 | -0.475395 |
| H | 4.070541  | -2.490206 | 0.072157  |
| H | 3.557853  | -1.138678 | -2.013586 |
| H | 4.153210  | -0.156292 | -0.666538 |

### 1c (A, DMPU)

$\Delta G = -404.771201$  hartree

|   |           |           |           |
|---|-----------|-----------|-----------|
| C | 0.797562  | 0.975084  | -0.350985 |
| C | 2.151803  | 1.299033  | -0.327394 |
| C | 3.121841  | 0.334558  | -0.018052 |
| C | 2.707758  | -0.981839 | 0.252400  |
| C | 1.360933  | -1.318183 | 0.233072  |
| C | 0.352122  | -0.348765 | -0.055086 |
| C | -2.265712 | 1.201653  | 0.754148  |
| C | -1.010089 | -0.765585 | -0.070256 |
| N | -2.119973 | 0.056356  | -0.151371 |
| C | -3.391623 | -0.609614 | -0.422314 |
| H | 0.078600  | 1.733907  | -0.640191 |
| H | 2.457412  | 2.314708  | -0.565949 |
| H | 4.175215  | 0.596886  | 0.000402  |
| H | 3.446044  | -1.746333 | 0.480336  |
| H | 1.058122  | -2.340131 | 0.448568  |
| H | -2.880063 | 1.973996  | 0.281660  |
| H | -2.756105 | 0.891103  | 1.690709  |

|   |           |           |           |
|---|-----------|-----------|-----------|
| H | -1.295584 | 1.626990  | 1.002403  |
| H | -1.212168 | -1.833435 | -0.115586 |
| H | -4.120637 | 0.128497  | -0.768222 |
| H | -3.260974 | -1.359126 | -1.205473 |
| H | -3.797625 | -1.099611 | 0.477737  |

### 1c (B, DMPU)

$\Delta G = -404.634546$  hartree

|   |           |           |           |
|---|-----------|-----------|-----------|
| C | -1.298322 | -1.334045 | 0.123704  |
| C | -2.657366 | -1.051723 | 0.215398  |
| C | -3.106292 | 0.262950  | 0.052021  |
| C | -2.193300 | 1.292455  | -0.206428 |
| C | -0.829642 | 1.023995  | -0.275090 |
| C | -0.360823 | -0.297140 | -0.093618 |
| C | 2.192333  | 1.366105  | 0.430071  |
| C | 1.023701  | -0.721738 | -0.163847 |
| N | 2.120703  | -0.045284 | 0.015042  |
| C | 3.432602  | -0.694358 | -0.172956 |
| H | -0.951200 | -2.356979 | 0.233095  |
| H | -3.364594 | -1.853283 | 0.400098  |
| H | -4.167410 | 0.484184  | 0.110188  |
| H | -2.546275 | 2.306593  | -0.361080 |
| H | -0.150794 | 1.831499  | -0.512589 |
| H | 3.117856  | 1.502893  | 0.988308  |
| H | 2.210316  | 2.013005  | -0.450538 |
| H | 1.345370  | 1.613450  | 1.067317  |
| H | 1.178633  | -1.775181 | -0.381605 |
| H | 3.962925  | -0.700127 | 0.781833  |
| H | 3.297852  | -1.712013 | -0.534469 |
| H | 4.005048  | -0.116062 | -0.901381 |

### 1c (TS3, DMPU)

$\Delta G = -1599.354737$  hartree

|   |           |           |           |
|---|-----------|-----------|-----------|
| C | -1.816386 | 0.313705  | 1.080202  |
| C | -3.111184 | -0.179235 | 1.233892  |
| C | -3.710476 | -0.913637 | 0.203602  |
| C | -3.000991 | -1.151568 | -0.977074 |
| C | -1.702881 | -0.659254 | -1.132717 |
| C | -1.096568 | 0.090296  | -0.111202 |
| C | -0.584616 | 2.967908  | -0.176104 |
| C | 0.299516  | 0.615458  | -0.207620 |
| S | 1.446633  | -0.139582 | -1.426824 |
| S | 1.839538  | -1.942607 | -0.301498 |
| S | 1.936011  | -1.068767 | 1.612655  |
| N | 0.486846  | 1.978682  | -0.054023 |
| C | 1.812214  | 2.546960  | 0.188274  |
| H | 0.952296  | -0.015513 | 0.951145  |
| H | -1.353329 | 0.869752  | 1.890587  |
| H | -3.649163 | 0.002462  | 2.159547  |
| H | -4.718076 | -1.300240 | 0.323561  |
| H | -3.456960 | -1.721222 | -1.781409 |
| H | -1.158482 | -0.847688 | -2.051626 |
| H | -0.838463 | 3.392597  | 0.802083  |
| H | -0.233958 | 3.779506  | -0.822618 |

|   |           |          |           |
|---|-----------|----------|-----------|
| H | -1.473312 | 2.519197 | -0.614337 |
| H | 1.738239  | 3.272394 | 1.005225  |
| H | 2.516067  | 1.764203 | 0.463987  |
| H | 2.180545  | 3.065269 | -0.704805 |

### 1c (2c, DMPU)

$\Delta G = -802.417608$  hartree

|   |           |           |           |
|---|-----------|-----------|-----------|
| C | 1.176485  | 0.712691  | -0.959318 |
| C | 2.567248  | 0.842246  | -0.977624 |
| C | 3.349092  | 0.159870  | -0.040349 |
| C | 2.733467  | -0.662804 | 0.909255  |
| C | 1.345148  | -0.812072 | 0.916107  |
| C | 0.554452  | -0.118358 | -0.012743 |
| C | -1.234017 | 2.043872  | 0.684660  |
| C | -0.929866 | -0.313042 | -0.044525 |
| S | -1.540853 | -1.859420 | -0.388305 |
| N | -1.712205 | 0.753733  | 0.162687  |
| C | -3.167210 | 0.664121  | 0.005827  |
| H | 0.573797  | 1.245564  | -1.688976 |
| H | 3.037493  | 1.476755  | -1.722979 |
| H | 4.429719  | 0.266019  | -0.051166 |
| H | 3.334199  | -1.194667 | 1.641044  |
| H | 0.869134  | -1.464717 | 1.640896  |
| H | -1.349288 | 2.824208  | -0.073954 |
| H | -1.836414 | 2.310054  | 1.558039  |
| H | -0.191031 | 1.978762  | 0.981362  |
| H | -3.569771 | 1.675849  | -0.053178 |
| H | -3.411181 | 0.113735  | -0.903511 |
| H | -3.616379 | 0.143880  | 0.858762  |

### 1c (1c, DMF)

$\Delta G = -405.397065$  hartree

|   |           |           |           |
|---|-----------|-----------|-----------|
| C | 0.904042  | 1.180380  | -0.101940 |
| C | 2.247389  | 1.306181  | 0.258885  |
| C | 3.077308  | 0.178230  | 0.286863  |
| C | 2.551697  | -1.072241 | -0.048133 |
| C | 1.203440  | -1.193000 | -0.406325 |
| C | 0.364106  | -0.071626 | -0.438209 |
| C | -2.027495 | -0.589936 | 1.351432  |
| C | -1.089640 | -0.194612 | -0.854968 |
| N | -2.034261 | 0.271226  | 0.169565  |
| C | -3.383680 | 0.388279  | -0.380780 |
| H | 0.263686  | 2.058029  | -0.122087 |
| H | 2.648956  | 2.282853  | 0.514739  |
| H | 4.122399  | 0.275497  | 0.566722  |
| H | 3.186040  | -1.954050 | -0.028214 |
| H | 0.800140  | -2.169799 | -0.662339 |
| H | -2.704258 | -0.179878 | 2.107120  |
| H | -2.351475 | -1.623792 | 1.122493  |
| H | -1.022457 | -0.634285 | 1.778880  |
| H | -1.298070 | -1.242924 | -1.144157 |
| H | -1.257152 | 0.417886  | -1.749155 |
| H | -4.059597 | 0.781020  | 0.384981  |
| H | -3.382245 | 1.082082  | -1.227137 |

|   |           |           |           |
|---|-----------|-----------|-----------|
| H | -3.789136 | -0.581143 | -0.729750 |
|---|-----------|-----------|-----------|

### 1c (TS1, DMF)

$\Delta G = -653.852465$  hartree

|   |           |           |           |
|---|-----------|-----------|-----------|
| N | 2.470754  | -1.188052 | -0.301067 |
| C | 3.176241  | -2.397765 | 0.123247  |
| C | 3.354293  | -0.307242 | -1.059150 |
| C | 1.789750  | -0.504115 | 0.823008  |
| O | 2.488435  | 0.229160  | 1.660274  |
| H | 2.493042  | -3.050042 | 0.677330  |
| H | 4.048533  | -2.185515 | 0.770208  |
| H | 3.536489  | -2.948998 | -0.754326 |
| H | 4.248335  | 0.009881  | -0.493169 |
| H | 2.809316  | 0.592252  | -1.359375 |
| H | 3.695299  | -0.822304 | -1.965327 |
| H | 1.107843  | -1.259100 | 1.278672  |
| C | -2.213490 | 0.073465  | 0.906726  |
| C | -3.250622 | -0.829304 | 1.142823  |
| C | -3.530916 | -1.857765 | 0.231685  |
| C | -2.747830 | -1.962797 | -0.928970 |
| C | -1.713755 | -1.060900 | -1.171101 |
| C | -1.412591 | -0.013914 | -0.261678 |
| C | -1.338642 | 3.040068  | -0.491954 |
| C | -0.269568 | 0.861206  | -0.495390 |
| N | -0.300551 | 2.184650  | 0.092801  |
| C | 1.005235  | 2.838655  | 0.009824  |
| H | -2.006460 | 0.861901  | 1.624029  |
| H | -3.846674 | -0.731651 | 2.047447  |
| H | -4.340734 | -2.557212 | 0.418184  |
| H | -2.951538 | -2.749969 | -1.651122 |
| H | -1.122403 | -1.153928 | -2.079639 |
| H | -1.358749 | 4.004545  | 0.028515  |
| H | -1.161859 | 3.233709  | -1.567991 |
| H | -2.319854 | 2.571086  | -0.386005 |
| H | 0.091551  | 0.843359  | -1.538701 |
| H | 0.853130  | 0.209009  | 0.179740  |
| H | 0.962043  | 3.810941  | 0.512965  |
| H | 1.759231  | 2.218527  | 0.499859  |
| H | 1.315931  | 3.016492  | -1.040044 |

### 1c (A, DMF)

$\Delta G = -404.771218$  hartree

|   |           |           |           |
|---|-----------|-----------|-----------|
| C | 0.797562  | 0.975084  | -0.350985 |
| C | 2.151803  | 1.299033  | -0.327394 |
| C | 3.121841  | 0.334558  | -0.018052 |
| C | 2.707758  | -0.981839 | 0.252400  |
| C | 1.360933  | -1.318183 | 0.233072  |
| C | 0.352122  | -0.348765 | -0.055086 |
| C | -2.265712 | 1.201653  | 0.754148  |
| C | -1.010089 | -0.765585 | -0.070256 |
| N | -2.119973 | 0.056356  | -0.151371 |
| C | -3.391623 | -0.609614 | -0.422314 |
| H | 0.078600  | 1.733907  | -0.640191 |
| H | 2.457412  | 2.314708  | -0.565949 |



|   |           |           |           |
|---|-----------|-----------|-----------|
| H | 4.175215  | 0.596886  | 0.000402  |
| H | 3.446044  | -1.746333 | 0.480336  |
| H | 1.058122  | -2.340131 | 0.448568  |
| H | -2.880063 | 1.973996  | 0.281660  |
| H | -2.756105 | 0.891103  | 1.690709  |
| H | -1.295584 | 1.626990  | 1.002403  |
| H | -1.212168 | -1.833435 | -0.115586 |
| H | -4.120637 | 0.128497  | -0.768222 |
| H | -3.260974 | -1.359126 | -1.205473 |
| H | -3.797625 | -1.099611 | 0.477737  |

|   |           |           |           |
|---|-----------|-----------|-----------|
| H | -4.718029 | -1.300326 | 0.323587  |
| H | -3.457271 | -1.720618 | -1.781739 |
| H | -1.158833 | -0.847018 | -2.052050 |
| H | -0.839384 | 3.390744  | 0.803412  |
| H | -0.234102 | 3.780476  | -0.820315 |
| H | -1.473181 | 2.519440  | -0.614791 |
| H | 1.738426  | 3.271586  | 1.005701  |
| H | 2.516357  | 1.764125  | 0.462562  |
| H | 2.179977  | 3.066314  | -0.704748 |

### 1c (B, DMF)

$\Delta G = -404.635455$  hartree

|   |           |           |           |
|---|-----------|-----------|-----------|
| C | -1.298322 | -1.334045 | 0.123704  |
| C | -2.657366 | -1.051723 | 0.215398  |
| C | -3.106292 | 0.262950  | 0.052021  |
| C | -2.193300 | 1.292455  | -0.206428 |
| C | -0.829642 | 1.023995  | -0.275090 |
| C | -0.360823 | -0.297140 | -0.093618 |
| C | 2.192333  | 1.366105  | 0.430071  |
| C | 1.023701  | -0.721738 | -0.163847 |
| N | 2.120703  | -0.045284 | 0.015042  |
| C | 3.432602  | -0.694358 | -0.172956 |
| H | -0.951200 | -2.356979 | 0.233095  |
| H | -3.364594 | -1.853283 | 0.400098  |
| H | -4.167410 | 0.484184  | 0.110188  |
| H | -2.546275 | 2.306593  | -0.361080 |
| H | -0.150794 | 1.831499  | -0.512589 |
| H | 3.117856  | 1.502893  | 0.988308  |
| H | 2.210316  | 2.013005  | -0.450538 |
| H | 1.345370  | 1.613450  | 1.067317  |
| H | 1.178633  | -1.775181 | -0.381605 |
| H | 3.962925  | -0.700127 | 0.781833  |
| H | 3.297852  | -1.712013 | -0.534469 |
| H | 4.005048  | -0.116062 | -0.901381 |

### 1c (2c, DMF)

$\Delta G = -802.417648$  hartree

|   |           |           |           |
|---|-----------|-----------|-----------|
| C | 1.176485  | 0.712691  | -0.959318 |
| C | 2.567248  | 0.842246  | -0.977624 |
| C | 3.349092  | 0.159870  | -0.040349 |
| C | 2.733467  | -0.662804 | 0.909255  |
| C | 1.345148  | -0.812072 | 0.916107  |
| C | 0.554452  | -0.118358 | -0.012743 |
| C | -1.234017 | 2.043872  | 0.684660  |
| C | -0.929866 | -0.313042 | -0.044525 |
| S | -1.540853 | -1.859420 | -0.388305 |
| N | -1.712205 | 0.753733  | 0.162687  |
| C | -3.167210 | 0.664121  | 0.005827  |
| H | 0.573797  | 1.245564  | -1.688976 |
| H | 3.037493  | 1.476755  | -1.722979 |
| H | 4.429719  | 0.266019  | -0.051166 |
| H | 3.334199  | -1.194667 | 1.641044  |
| H | 0.869134  | -1.464717 | 1.640896  |
| H | -1.349288 | 2.824208  | -0.073954 |
| H | -1.836414 | 2.310054  | 1.558039  |
| H | -0.191031 | 1.978762  | 0.981362  |
| H | -3.569771 | 1.675849  | -0.053178 |
| H | -3.411181 | 0.113735  | -0.903511 |
| H | -3.616379 | 0.143880  | 0.858762  |

### 1c (TS3, DMF)

$\Delta G = -1599.349580$  hartree

|   |           |           |           |
|---|-----------|-----------|-----------|
| C | -1.816184 | 0.313329  | 1.080291  |
| C | -3.110970 | -0.179649 | 1.234029  |
| C | -3.710437 | -0.913712 | 0.203598  |
| C | -3.001151 | -1.151260 | -0.977280 |
| C | -1.703060 | -0.658904 | -1.132973 |
| C | -1.096570 | 0.090301  | -0.111306 |
| C | -0.584875 | 2.967742  | -0.175333 |
| C | 0.299528  | 0.615460  | -0.207785 |
| S | 1.446543  | -0.139626 | -1.426958 |
| S | 1.839866  | -1.942542 | -0.301437 |
| S | 1.935870  | -1.068634 | 1.612778  |
| N | 0.486873  | 1.978680  | -0.054388 |
| C | 1.812214  | 2.547007  | 0.187971  |
| H | 0.952310  | -0.015454 | 0.951094  |
| H | -1.353019 | 0.869150  | 1.890768  |
| H | -3.648807 | 0.001783  | 2.159818  |

### 1d (1d, DMPU)

$\Delta G = -482.793072$  hartree

|   |           |           |           |
|---|-----------|-----------|-----------|
| N | 0.558106  | 0.022252  | -0.151425 |
| C | 1.266788  | -1.258923 | -0.059570 |
| C | 2.707003  | -1.132972 | -0.571071 |
| C | 3.472889  | -0.021011 | 0.154995  |
| C | 2.684271  | 1.291920  | 0.079258  |
| C | 1.251436  | 1.100338  | 0.581101  |
| C | -3.694070 | 0.006011  | 0.008099  |
| C | -2.984189 | 1.174315  | -0.299711 |
| C | -1.591707 | 1.174561  | -0.339632 |
| C | -0.850865 | 0.001742  | -0.062147 |
| C | -1.576426 | -1.166590 | 0.253556  |
| C | -2.975991 | -1.159491 | 0.279182  |
| H | 0.733855  | -1.995588 | -0.666015 |
| H | 1.276065  | -1.632845 | 0.981955  |
| H | 2.681711  | -0.919682 | -1.647774 |
| H | 3.208994  | -2.099458 | -0.444250 |
| H | 4.473153  | 0.102168  | -0.276157 |

|   |           |           |           |
|---|-----------|-----------|-----------|
| H | 3.612696  | -0.300881 | 1.208990  |
| H | 2.654890  | 1.648516  | -0.958924 |
| H | 3.167162  | 2.072816  | 0.678653  |
| H | 0.692296  | 2.029253  | 0.470267  |
| H | 1.270083  | 0.858977  | 1.660790  |
| H | -4.779517 | 0.007921  | 0.032360  |
| H | -3.519270 | 2.092793  | -0.526006 |
| H | -1.073556 | 2.086880  | -0.615961 |
| H | -1.058669 | -2.087722 | 0.491587  |
| H | -3.501476 | -2.078299 | 0.526106  |

### 1d (TS1, DMPU)

$\Delta G = -903.252781$  hartree

|   |           |           |           |
|---|-----------|-----------|-----------|
| N | -1.872995 | -0.460474 | 0.072974  |
| C | -0.869127 | -1.126511 | -0.740669 |
| C | -0.837288 | -2.640867 | -0.647372 |
| C | -2.222263 | -3.296862 | -0.590469 |
| C | -2.980393 | -2.671120 | 0.578062  |
| C | -3.131934 | -1.162606 | 0.390813  |
| C | -2.101989 | 3.780091  | -0.222412 |
| C | -3.184065 | 3.040286  | 0.261725  |
| C | -3.126693 | 1.647025  | 0.354612  |
| C | -1.959253 | 0.932353  | -0.023493 |
| C | -0.872951 | 1.695181  | -0.525474 |
| C | -0.950738 | 3.084521  | -0.612924 |
| H | 0.528671  | -0.835114 | -0.319426 |
| H | -0.895527 | -0.758798 | -1.778025 |
| H | -0.284136 | -2.942468 | 0.254623  |
| H | -0.256335 | -3.016716 | -1.496505 |
| H | -2.131150 | -4.382849 | -0.460093 |
| H | -2.770842 | -3.125982 | -1.528058 |
| H | -2.439057 | -2.877661 | 1.511486  |
| H | -3.984730 | -3.096701 | 0.689214  |
| H | -3.544423 | -0.738110 | 1.311259  |
| H | -3.870689 | -0.976555 | -0.410564 |
| H | -2.153740 | 4.862380  | -0.296017 |
| H | -4.097228 | 3.545771  | 0.566792  |
| H | -4.001830 | 1.128335  | 0.722761  |
| H | 0.052272  | 1.202880  | -0.800850 |
| H | -0.089762 | 3.630945  | -0.991646 |
| N | 1.824707  | -0.014216 | 1.286199  |
| C | 1.243227  | -0.825879 | 2.347725  |
| C | 1.843686  | -0.744986 | -0.018832 |
| O | 2.401424  | -1.934467 | -0.026872 |
| N | 2.312993  | 0.231292  | -1.056585 |
| C | 2.275619  | -0.344913 | -2.395839 |
| C | 3.657562  | 0.747898  | -0.767026 |
| C | 3.693647  | 1.422446  | 0.602680  |
| C | 3.153861  | 0.473108  | 1.670537  |
| H | 0.256509  | -1.183223 | 2.040049  |
| H | 1.121143  | -0.212936 | 3.249445  |
| H | 1.857079  | -1.705912 | 2.612760  |
| H | 1.279527  | -0.744621 | -2.604714 |
| H | 3.004818  | -1.162593 | -2.539159 |
| H | 2.491990  | 0.437562  | -3.133689 |

|   |          |           |           |
|---|----------|-----------|-----------|
| H | 3.931069 | 1.463855  | -1.553510 |
| H | 4.411633 | -0.064266 | -0.797886 |
| H | 3.079915 | 2.331840  | 0.580592  |
| H | 4.721346 | 1.719547  | 0.846178  |
| H | 3.069089 | 0.991303  | 2.634945  |
| H | 3.864601 | -0.365378 | 1.817024  |

### 1d (A, DMPU)

$\Delta G = -482.150542$  hartree

|   |           |           |           |
|---|-----------|-----------|-----------|
| N | -0.563439 | 0.011392  | -0.043272 |
| C | -1.289941 | -1.270057 | 0.031555  |
| C | -2.704845 | -1.096110 | 0.591426  |
| C | -3.484334 | -0.019355 | -0.168951 |
| C | -2.709265 | 1.305642  | -0.101687 |
| C | -1.269413 | 1.131047  | -0.473137 |
| C | 3.677324  | 0.023683  | 0.047664  |
| C | 2.950167  | 1.196646  | 0.286336  |
| C | 1.556788  | 1.194948  | 0.258807  |
| C | 0.839717  | 0.006396  | -0.015530 |
| C | 1.580886  | -1.172213 | -0.261346 |
| C | 2.976545  | -1.155925 | -0.222999 |
| H | -0.723872 | -1.946007 | 0.675584  |
| H | -1.340027 | -1.723166 | -0.971222 |
| H | -2.640888 | -0.822367 | 1.653096  |
| H | -3.213019 | -2.065537 | 0.538308  |
| H | -4.487772 | 0.101302  | 0.254517  |
| H | -3.606118 | -0.323696 | -1.217276 |
| H | -2.797775 | 1.704241  | 0.928200  |
| H | -3.158780 | 2.059169  | -0.757722 |
| H | -0.676090 | 1.982174  | -0.779136 |
| H | 4.762568  | 0.030164  | 0.072703  |
| H | 3.471072  | 2.123459  | 0.511428  |
| H | 1.019609  | 2.109600  | 0.483453  |
| H | 1.075662  | -2.099809 | -0.501992 |
| H | 3.517719  | -2.077493 | -0.419865 |

### 1d (B, DMPU)

$\Delta G = -482.029018$  hartree

|   |           |           |           |
|---|-----------|-----------|-----------|
| N | -0.583655 | -0.020114 | -0.055209 |
| C | -1.284888 | 1.068391  | 0.696470  |
| C | -2.748998 | 1.190376  | 0.291946  |
| C | -3.428387 | -0.182012 | 0.293063  |
| C | -2.696305 | -1.123167 | -0.669222 |
| C | -1.220608 | -0.970309 | -0.659999 |
| C | 3.643558  | -0.016712 | 0.031183  |
| C | 2.957247  | 1.068638  | -0.524208 |
| C | 1.561882  | 1.080365  | -0.552848 |
| C | 0.868671  | -0.012451 | -0.025956 |
| C | 1.537892  | -1.102221 | 0.535255  |
| C | 2.934793  | -1.099020 | 0.558953  |
| H | -0.731628 | 1.987390  | 0.500816  |
| H | -1.166647 | 0.825918  | 1.757454  |
| H | -2.818216 | 1.647345  | -0.702357 |
| H | -3.234979 | 1.871483  | 0.996043  |

|   |           |           |           |
|---|-----------|-----------|-----------|
| H | -4.476421 | -0.097282 | -0.004028 |
| H | -3.411430 | -0.603944 | 1.304189  |
| H | -3.007172 | -0.965021 | -1.713589 |
| H | -2.911797 | -2.180673 | -0.471162 |
| H | -0.610255 | -1.690510 | -1.199186 |
| H | 4.728636  | -0.016734 | 0.053300  |
| H | 3.505933  | 1.906507  | -0.941612 |
| H | 1.029058  | 1.913635  | -0.998546 |
| H | 0.978287  | -1.929145 | 0.960285  |
| H | 3.463087  | -1.939441 | 0.997035  |

### 1d (TS2, DMPU)

$\Delta G = -1676.760052$  hartree

|   |           |           |           |
|---|-----------|-----------|-----------|
| N | 0.969602  | 0.922049  | 0.165296  |
| C | 1.243132  | 2.209236  | -0.517198 |
| C | 0.124904  | 3.235699  | -0.305446 |
| C | -0.447677 | 3.120429  | 1.106663  |
| C | -1.088771 | 1.736015  | 1.283312  |
| C | -0.302124 | 0.630369  | 0.584881  |
| S | -1.410876 | -0.003907 | -1.222885 |
| S | -3.266827 | -0.595288 | -0.528146 |
| S | -3.206447 | -2.354301 | 0.437642  |
| C | 3.947657  | -2.099444 | 0.024477  |
| C | 3.903803  | -1.107778 | -0.957551 |
| C | 2.922583  | -0.113311 | -0.925261 |
| C | 1.963656  | -0.097969 | 0.101790  |
| C | 2.025484  | -1.085611 | 1.103073  |
| C | 3.002347  | -2.079055 | 1.055616  |
| H | -0.378437 | -0.338226 | 1.062647  |
| H | 1.375998  | 2.030914  | -1.589920 |
| H | 2.192823  | 2.583551  | -0.121183 |
| H | -0.673809 | 3.078064  | -1.038808 |
| H | 0.540954  | 4.230413  | -0.492091 |
| H | -1.191571 | 3.900461  | 1.293458  |
| H | 0.355611  | 3.259039  | 1.840599  |
| H | -2.122901 | 1.736822  | 0.930385  |
| H | -1.126699 | 1.464741  | 2.345825  |
| H | 4.711089  | -2.870464 | -0.005636 |
| H | 4.631537  | -1.104646 | -1.763486 |
| H | 2.908239  | 0.633482  | -1.708835 |
| H | 1.333281  | -1.065167 | 1.937660  |
| H | 3.033102  | -2.828877 | 1.840411  |

### 1d (C, DMPU)

$\Delta G = -1676.761462$  hartree

|   |           |           |           |
|---|-----------|-----------|-----------|
| N | 0.937498  | 0.936687  | 0.146675  |
| C | 1.325820  | 2.337794  | -0.113678 |
| C | 0.127855  | 3.178996  | -0.556872 |
| C | -1.019659 | 3.161402  | 0.471415  |
| C | -1.049541 | 1.835363  | 1.260303  |
| C | -0.389023 | 0.669640  | 0.534461  |
| S | -1.457596 | 0.176565  | -1.087716 |
| S | -3.176937 | -0.705491 | -0.280437 |
| S | -2.785501 | -2.525079 | 0.459126  |

|   |           |           |           |
|---|-----------|-----------|-----------|
| C | 3.860143  | -2.131937 | -0.050289 |
| C | 4.235451  | -0.785947 | -0.024199 |
| C | 3.276561  | 0.226291  | 0.037072  |
| C | 1.900077  | -0.086766 | 0.071346  |
| C | 1.527621  | -1.449120 | 0.044590  |
| C | 2.499195  | -2.449001 | -0.014562 |
| H | -0.450711 | -0.246079 | 1.121953  |
| H | 2.079263  | 2.342668  | -0.904471 |
| H | 1.786903  | 2.768951  | 0.786970  |
| H | -0.225987 | 2.795597  | -1.520561 |
| H | 0.475355  | 4.201596  | -0.734607 |
| H | -1.971603 | 3.314807  | -0.045700 |
| H | -0.908649 | 3.988934  | 1.179668  |
| H | -2.070487 | 1.554497  | 1.533253  |
| H | -0.494594 | 1.944304  | 2.201701  |
| H | 4.610073  | -2.915233 | -0.097415 |
| H | 5.286510  | -0.511922 | -0.042008 |
| H | 3.610074  | 1.255345  | 0.082068  |
| H | 0.484548  | -1.739275 | 0.040236  |
| H | 2.180379  | -3.487209 | -0.040916 |

### 1d (TS3, DMPU)

$\Delta G = -1676.727438$  hartree

|   |           |           |           |
|---|-----------|-----------|-----------|
| N | 0.395396  | 1.071912  | -0.065227 |
| C | 0.419199  | 2.356311  | 0.680499  |
| C | -0.684899 | 3.316545  | 0.249339  |
| C | -2.039985 | 2.607929  | 0.258117  |
| C | -1.986454 | 1.403486  | -0.685562 |
| C | -0.815395 | 0.471335  | -0.384594 |
| S | -0.680585 | -1.002503 | -1.426921 |
| S | -2.340790 | -2.072225 | -0.504555 |
| S | -1.983712 | -1.507942 | 1.495135  |
| C | 4.059302  | -1.035559 | 0.193761  |
| C | 3.761539  | -0.273635 | -0.940305 |
| C | 2.543821  | 0.406846  | -1.028761 |
| C | 1.622539  | 0.315396  | 0.019014  |
| C | 1.918500  | -0.436210 | 1.161326  |
| C | 3.137664  | -1.114101 | 1.243158  |
| H | -1.321146 | -0.255638 | 0.839230  |
| H | 1.407906  | 2.792075  | 0.521130  |
| H | 0.326618  | 2.130488  | 1.753371  |
| H | -0.470199 | 3.697793  | -0.756687 |
| H | -0.676631 | 4.173180  | 0.931315  |
| H | -2.837741 | 3.286214  | -0.061371 |
| H | -2.285188 | 2.279357  | 1.276453  |
| H | -1.881870 | 1.751603  | -1.722767 |
| H | -2.910935 | 0.821202  | -0.638436 |
| H | 5.005757  | -1.563341 | 0.261189  |
| H | 4.474731  | -0.206604 | -1.756209 |
| H | 2.302968  | 1.004421  | -1.902559 |
| H | 1.198931  | -0.498301 | 1.971054  |
| H | 3.365414  | -1.703181 | 2.126382  |

### 1d (2d, DMPU)

**$\Delta G = -879.812245$  hartree**

|   |           |           |           |
|---|-----------|-----------|-----------|
| N | 0.498162  | -0.307619 | -0.028769 |
| C | 1.033551  | -1.698289 | 0.052147  |
| C | 2.507529  | -1.798808 | -0.312493 |
| C | 3.289007  | -0.703600 | 0.408395  |
| C | 2.758236  | 0.661056  | -0.036503 |
| C | 1.244048  | 0.807456  | -0.039278 |
| S | 0.578293  | 2.367179  | -0.101873 |
| C | -3.734493 | -0.286282 | 0.056108  |
| C | -3.058658 | -0.351550 | -1.166940 |
| C | -1.661710 | -0.338833 | -1.198679 |
| C | -0.947144 | -0.250815 | -0.001576 |
| C | -1.613242 | -0.197572 | 1.225288  |
| C | -3.010412 | -0.211859 | 1.250534  |
| H | 0.418513  | -2.309258 | -0.613266 |
| H | 0.863675  | -2.053535 | 1.076235  |
| H | 2.633143  | -1.694744 | -1.397403 |
| H | 2.860277  | -2.798002 | -0.037671 |
| H | 4.358938  | -0.768366 | 0.186872  |
| H | 3.176790  | -0.818306 | 1.494217  |
| H | 3.084943  | 0.868557  | -1.064469 |
| H | 3.161631  | 1.470501  | 0.575912  |
| H | -4.820018 | -0.297842 | 0.078446  |
| H | -3.616596 | -0.413490 | -2.096359 |
| H | -1.127745 | -0.389032 | -2.142618 |
| H | -1.042898 | -0.137338 | 2.146988  |
| H | -3.530752 | -0.166091 | 2.202452  |

**1d (1d, DMF)**

**$\Delta G = -482.793088$  hartree**

|   |           |           |           |
|---|-----------|-----------|-----------|
| N | 0.558106  | 0.022252  | -0.151425 |
| C | 1.266788  | -1.258923 | -0.059570 |
| C | 2.707003  | -1.132972 | -0.571071 |
| C | 3.472889  | -0.021011 | 0.154995  |
| C | 2.684271  | 1.291920  | 0.079258  |
| C | 1.251436  | 1.100338  | 0.581101  |
| C | -3.694070 | 0.006011  | 0.008099  |
| C | -2.984189 | 1.174315  | -0.299711 |
| C | -1.591707 | 1.174561  | -0.339632 |
| C | -0.850865 | 0.001742  | -0.062147 |
| C | -1.576426 | -1.166590 | 0.253556  |
| C | -2.975991 | -1.159491 | 0.279182  |
| H | 0.733855  | -1.995588 | -0.666015 |
| H | 1.276065  | -1.632845 | 0.981955  |
| H | 2.681711  | -0.919682 | -1.647774 |
| H | 3.208994  | -2.099458 | -0.444250 |
| H | 4.473153  | 0.102168  | -0.276157 |
| H | 3.612696  | -0.300881 | 1.208990  |
| H | 2.654890  | 1.648516  | -0.958924 |
| H | 3.167162  | 2.072816  | 0.678653  |
| H | 0.692296  | 2.029253  | 0.470267  |
| H | 1.270083  | 0.858977  | 1.660790  |
| H | -4.779517 | 0.007921  | 0.032360  |
| H | -3.519270 | 2.092793  | -0.526006 |
| H | -1.073556 | 2.086880  | -0.615961 |

|   |           |           |          |
|---|-----------|-----------|----------|
| H | -1.058669 | -2.087722 | 0.491587 |
| H | -3.501476 | -2.078299 | 0.526106 |

**1d (TS1, DMF)**

**$\Delta G = -731.239072$  hartree**

|   |           |           |           |
|---|-----------|-----------|-----------|
| N | -2.225361 | -1.516432 | 0.627917  |
| C | -2.934239 | -2.791916 | 0.728793  |
| C | -2.700083 | -0.584619 | 1.645804  |
| C | -2.263111 | -0.952498 | -0.748242 |
| O | -3.398162 | -0.446654 | -1.203264 |
| H | -2.562220 | -3.483721 | -0.034701 |
| H | -4.028441 | -2.692709 | 0.596733  |
| H | -2.756734 | -3.244091 | 1.713075  |
| H | -3.782763 | -0.373535 | 1.575644  |
| H | -2.164185 | 0.364629  | 1.556436  |
| H | -2.504297 | -0.997032 | 2.643452  |
| H | -1.798443 | -1.734073 | -1.398203 |
| N | 0.805154  | 0.958068  | 0.057441  |
| C | -0.269493 | 1.047451  | -0.914882 |
| C | -1.170842 | 2.263111  | -0.808011 |
| C | -0.436359 | 3.564309  | -0.458774 |
| C | 0.356727  | 3.318285  | 0.822992  |
| C | 1.371570  | 2.191638  | 0.636677  |
| C | 3.415750  | -2.393326 | -0.220048 |
| C | 3.792819  | -1.251231 | 0.492506  |
| C | 2.951545  | -0.140014 | 0.583072  |
| C | 1.670631  | -0.134176 | -0.031240 |
| C | 1.310674  | -1.295035 | -0.764743 |
| C | 2.164444  | -2.394059 | -0.847672 |
| H | -1.280878 | -0.044136 | -0.753786 |
| H | 0.099400  | 0.872266  | -1.937752 |
| H | -1.933885 | 2.094729  | -0.032240 |
| H | -1.715252 | 2.362420  | -1.753198 |
| H | -1.150202 | 4.387082  | -0.324704 |
| H | 0.245324  | 3.852516  | -1.271786 |
| H | -0.338243 | 3.061204  | 1.634205  |
| H | 0.904882  | 4.212450  | 1.142316  |
| H | 1.805219  | 1.952395  | 1.612156  |
| H | 2.195600  | 2.554919  | -0.004265 |
| H | 4.076882  | -3.251810 | -0.290120 |
| H | 4.762406  | -1.211270 | 0.982979  |
| H | 3.306805  | 0.719838  | 1.135023  |
| H | 0.344611  | -1.343365 | -1.246347 |
| H | 1.840968  | -3.264443 | -1.413704 |

**1d (A, DMF)**

**$\Delta G = -482.157181$  hartree**

|   |           |           |           |
|---|-----------|-----------|-----------|
| N | -0.563439 | 0.011392  | -0.043272 |
| C | -1.289941 | -1.270057 | 0.031555  |
| C | -2.704845 | -1.096110 | 0.591426  |
| C | -3.484334 | -0.019355 | -0.168951 |
| C | -2.709265 | 1.305642  | -0.101687 |
| C | -1.269413 | 1.131047  | -0.473137 |
| C | 3.677324  | 0.023683  | 0.047664  |

|   |           |           |           |
|---|-----------|-----------|-----------|
| C | 2.950167  | 1.196646  | 0.286336  |
| C | 1.556788  | 1.194948  | 0.258807  |
| C | 0.839717  | 0.006396  | -0.015530 |
| C | 1.580886  | -1.172213 | -0.261346 |
| C | 2.976545  | -1.155925 | -0.222999 |
| H | -0.723872 | -1.946007 | 0.675584  |
| H | -1.340027 | -1.723166 | -0.971222 |
| H | -2.640888 | -0.822367 | 1.653096  |
| H | -3.213019 | -2.065537 | 0.538308  |
| H | -4.487772 | 0.101302  | 0.254517  |
| H | -3.606118 | -0.323696 | -1.217276 |
| H | -2.797775 | 1.704241  | 0.928200  |
| H | -3.158780 | 2.059169  | -0.757722 |
| H | -0.676090 | 1.982174  | -0.779136 |
| H | 4.762568  | 0.030164  | 0.072703  |
| H | 3.471072  | 2.123459  | 0.511428  |
| H | 1.019609  | 2.109600  | 0.483453  |
| H | 1.075662  | -2.099809 | -0.501992 |
| H | 3.517719  | -2.077493 | -0.419865 |

### 1d (B, DMF)

$\Delta G = -482.035076$  hartree

|   |           |           |           |
|---|-----------|-----------|-----------|
| N | -0.583655 | -0.020114 | -0.055209 |
| C | -1.284888 | 1.068391  | 0.696470  |
| C | -2.748998 | 1.190376  | 0.291946  |
| C | -3.428387 | -0.182012 | 0.293063  |
| C | -2.696305 | -1.123167 | -0.669222 |
| C | -1.220608 | -0.970309 | -0.659999 |
| C | 3.643558  | -0.016712 | 0.031183  |
| C | 2.957247  | 1.068638  | -0.524208 |
| C | 1.561882  | 1.080365  | -0.552848 |
| C | 0.868671  | -0.012451 | -0.025956 |
| C | 1.537892  | -1.102221 | 0.535255  |
| C | 2.934793  | -1.099020 | 0.558953  |
| H | -0.731628 | 1.987390  | 0.500816  |
| H | -1.166647 | 0.825918  | 1.757454  |
| H | -2.818216 | 1.647345  | -0.702357 |
| H | -3.234979 | 1.871483  | 0.996043  |
| H | -4.476421 | -0.097282 | -0.004028 |
| H | -3.411430 | -0.603944 | 1.304189  |
| H | -3.007172 | -0.965021 | -1.713589 |
| H | -2.911797 | -2.180673 | -0.471162 |
| H | -0.610255 | -1.690510 | -1.199186 |
| H | 4.728636  | -0.016734 | 0.053300  |
| H | 3.505933  | 1.906507  | -0.941612 |
| H | 1.029058  | 1.913635  | -0.998546 |
| H | 0.978287  | -1.929145 | 0.960285  |
| H | 3.463087  | -1.939441 | 0.997035  |

### 1d (TS2, DMF)

$\Delta G = -1676.765394$  hartree

|   |          |          |           |
|---|----------|----------|-----------|
| N | 0.969604 | 0.921820 | 0.165184  |
| C | 1.243066 | 2.208599 | -0.518091 |
| C | 0.125445 | 3.235645 | -0.305776 |

|   |           |           |           |
|---|-----------|-----------|-----------|
| C | -0.446474 | 3.120671  | 1.106620  |
| C | -1.088264 | 1.736618  | 1.283577  |
| C | -0.302482 | 0.630466  | 0.584749  |
| S | -1.410459 | -0.003160 | -1.221650 |
| S | -3.266745 | -0.594246 | -0.527223 |
| S | -3.207250 | -2.354822 | 0.435728  |
| C | 3.947316  | -2.100098 | 0.024642  |
| C | 3.904567  | -1.107493 | -0.956482 |
| C | 2.923451  | -0.112916 | -0.924253 |
| C | 1.963418  | -0.098329 | 0.101828  |
| C | 2.024197  | -1.086944 | 1.102270  |
| C | 3.000975  | -2.080471 | 1.054860  |
| H | -0.378698 | -0.337723 | 1.063364  |
| H | 1.375022  | 2.029869  | -1.590875 |
| H | 2.193200  | 2.582732  | -0.122977 |
| H | -0.673733 | 3.078445  | -1.038726 |
| H | 0.541902  | 4.230147  | -0.492635 |
| H | -1.189830 | 3.901120  | 1.293817  |
| H | 0.357273  | 3.258803  | 1.840140  |
| H | -2.122533 | 1.738042  | 0.931045  |
| H | -1.125905 | 1.465419  | 2.346107  |
| H | 4.710668  | -2.871199 | -0.005413 |
| H | 4.633123  | -1.103663 | -1.761674 |
| H | 2.910097  | 0.634622  | -1.707124 |
| H | 1.331299  | -1.067225 | 1.936285  |
| H | 3.030851  | -2.830980 | 1.839034  |

### 1d (C, DMF)

$\Delta G = -1676.766518$  hartree

|   |           |           |           |
|---|-----------|-----------|-----------|
| N | 0.937686  | 0.936646  | 0.146753  |
| C | 1.326149  | 2.337671  | -0.113921 |
| C | 0.128240  | 3.178924  | -0.557137 |
| C | -1.019122 | 3.161731  | 0.471329  |
| C | -1.049120 | 1.835813  | 1.260392  |
| C | -0.388819 | 0.669874  | 0.534705  |
| S | -1.457643 | 0.176730  | -1.087406 |
| S | -3.177068 | -0.705082 | -0.280117 |
| S | -2.786097 | -2.525188 | 0.458467  |
| C | 3.859929  | -2.132389 | -0.050229 |
| C | 4.235387  | -0.786427 | -0.024510 |
| C | 3.276624  | 0.225935  | 0.036740  |
| C | 1.900107  | -0.086958 | 0.071378  |
| C | 1.527501  | -1.449287 | 0.045026  |
| C | 2.498950  | -2.449297 | -0.014121 |
| H | -0.450662 | -0.245735 | 1.122330  |
| H | 2.079502  | 2.342331  | -0.904800 |
| H | 1.787375  | 2.768919  | 0.786598  |
| H | -0.225806 | 2.795332  | -1.520679 |
| H | 0.475882  | 4.201416  | -0.735188 |
| H | -1.971112 | 3.315245  | -0.045678 |
| H | -0.907848 | 3.989325  | 1.179457  |
| H | -2.070072 | 1.555119  | 1.533498  |
| H | -0.494044 | 1.944818  | 2.201705  |
| H | 4.609767  | -2.915773 | -0.097350 |
| H | 5.286473  | -0.512528 | -0.042595 |

|   |          |           |           |
|---|----------|-----------|-----------|
| H | 3.610271 | 1.254952  | 0.081438  |
| H | 0.484408 | -1.739358 | 0.041100  |
| H | 2.180028 | -3.487482 | -0.040144 |

### 1d (TS3, DMF)

$\Delta G = -1676.727454$  hartree

|   |           |           |           |
|---|-----------|-----------|-----------|
| N | 0.395170  | 1.071941  | -0.065351 |
| C | 0.418626  | 2.356461  | 0.680191  |
| C | -0.685539 | 3.316453  | 0.248655  |
| C | -2.040524 | 2.607646  | 0.257202  |
| C | -1.986626 | 1.402994  | -0.686194 |
| C | -0.815461 | 0.471109  | -0.384826 |
| S | -0.680383 | -1.003040 | -1.426626 |
| S | -2.340317 | -2.072959 | -0.503785 |
| S | -1.983417 | -1.507692 | 1.495682  |
| C | 4.059457  | -1.034804 | 0.193707  |
| C | 3.760491  | -0.275021 | -0.941487 |
| C | 2.542662  | 0.405259  | -1.029973 |
| C | 1.622464  | 0.315705  | 0.018921  |
| C | 1.919638  | -0.433713 | 1.162362  |
| C | 3.138923  | -1.111399 | 1.244218  |
| H | -1.321098 | -0.255518 | 0.839266  |
| H | 1.407288  | 2.792346  | 0.520898  |
| H | 0.325871  | 2.130805  | 1.753071  |
| H | -0.470654 | 3.697663  | -0.757341 |
| H | -0.677585 | 4.173128  | 0.930580  |
| H | -2.838270 | 3.285760  | -0.062672 |
| H | -2.285963 | 2.279281  | 1.275545  |
| H | -1.881927 | 1.750878  | -1.723464 |
| H | -2.911022 | 0.820570  | -0.639074 |
| H | 5.006017  | -1.562396 | 0.261155  |
| H | 4.472863  | -0.209455 | -1.758226 |
| H | 2.300907  | 1.001248  | -1.904602 |
| H | 1.200955  | -0.494205 | 1.973007  |
| H | 3.367640  | -1.698766 | 2.128332  |

### 1d (2d, DMF)

$\Delta G = -879.812294$  hartree

|   |           |           |           |
|---|-----------|-----------|-----------|
| N | 0.498162  | -0.307619 | -0.028769 |
| C | 1.033551  | -1.698289 | 0.052147  |
| C | 2.507529  | -1.798808 | -0.312493 |
| C | 3.289007  | -0.703600 | 0.408395  |
| C | 2.758236  | 0.661056  | -0.036503 |
| C | 1.244048  | 0.807456  | -0.039278 |
| S | 0.578293  | 2.367179  | -0.101873 |
| C | -3.734493 | -0.286282 | 0.056108  |
| C | -3.058658 | -0.351550 | -1.166940 |
| C | -1.661710 | -0.338833 | -1.198679 |
| C | -0.947144 | -0.250815 | -0.001576 |
| C | -1.613242 | -0.197572 | 1.225288  |
| C | -3.010412 | -0.211859 | 1.250534  |
| H | 0.418513  | -2.309258 | -0.613266 |
| H | 0.863675  | -2.053535 | 1.076235  |
| H | 2.633143  | -1.694744 | -1.397403 |

|   |           |           |           |
|---|-----------|-----------|-----------|
| H | 2.860277  | -2.798002 | -0.037671 |
| H | 4.358938  | -0.768366 | 0.186872  |
| H | 3.176790  | -0.818306 | 1.494217  |
| H | 3.084943  | 0.868557  | -1.064469 |
| H | 3.161631  | 1.470501  | 0.575912  |
| H | -4.820018 | -0.297842 | 0.078446  |
| H | -3.616596 | -0.413490 | -2.096359 |
| H | -1.127745 | -0.389032 | -2.142618 |
| H | -1.042898 | -0.137338 | 2.146988  |
| H | -3.530752 | -0.166091 | 2.202452  |

### 1e (1e, DMPU)

$\Delta G = -443.505290$  hartree

|   |           |           |           |
|---|-----------|-----------|-----------|
| N | -0.846490 | 0.000003  | -0.000053 |
| C | -1.659978 | 1.218742  | -0.012979 |
| C | -3.078213 | 0.705985  | -0.304051 |
| C | -3.078203 | -0.705989 | 0.304077  |
| C | -1.659967 | -1.218744 | 0.012992  |
| C | 3.375045  | -0.000002 | 0.000017  |
| C | 2.658201  | 1.199165  | 0.086107  |
| C | 1.263398  | 1.210302  | 0.088312  |
| C | 0.527279  | 0.000005  | -0.000024 |
| C | 1.263395  | -1.210296 | -0.088333 |
| C | 2.658197  | -1.199167 | -0.086091 |
| H | -1.308505 | 1.918863  | -0.780487 |
| H | -1.610994 | 1.738459  | 0.957017  |
| H | -3.238504 | 0.650379  | -1.386880 |
| H | -3.848369 | 1.357152  | 0.118072  |
| H | -3.848360 | -1.357163 | -0.118035 |
| H | -3.238485 | -0.650382 | 1.386908  |
| H | -1.611001 | -1.738531 | -0.956966 |
| H | -1.308460 | -1.918805 | 0.780541  |
| H | 4.460610  | -0.000005 | 0.000032  |
| H | 3.189349  | 2.145087  | 0.157114  |
| H | 0.741947  | 2.157446  | 0.167239  |
| H | 0.741939  | -2.157438 | -0.167271 |
| H | 3.189342  | -2.145091 | -0.157080 |

### 1e (TS1, DMPU)

$\Delta G = -863.963086$  hartree

|   |          |           |           |
|---|----------|-----------|-----------|
| N | 1.747771 | 1.063684  | -0.099690 |
| C | 2.289579 | 2.141867  | 0.736564  |
| C | 1.656158 | 3.406775  | 0.142073  |
| C | 0.294453 | 2.912110  | -0.385279 |
| C | 0.525301 | 1.451845  | -0.763023 |
| C | 3.603396 | -2.712100 | -0.508933 |
| C | 4.099028 | -1.765599 | 0.397721  |
| C | 3.489162 | -0.521092 | 0.553238  |
| C | 2.344056 | -0.168911 | -0.212268 |
| C | 1.842385 | -1.142111 | -1.119775 |
| C | 2.466504 | -2.380594 | -1.257690 |
| H | 3.382806 | 2.162396  | 0.681541  |
| H | 2.011371 | 2.005951  | 1.793781  |
| H | 2.277003 | 3.769277  | -0.685686 |

|   |           |           |           |
|---|-----------|-----------|-----------|
| H | 1.571882  | 4.212119  | 0.878406  |
| H | -0.068749 | 3.506426  | -1.229885 |
| H | -0.470410 | 2.970816  | 0.401296  |
| H | 0.542265  | 1.233053  | -1.837611 |
| H | -0.690291 | 0.789387  | -0.262102 |
| H | 4.082442  | -3.679873 | -0.621551 |
| H | 4.972512  | -1.998470 | 1.002143  |
| H | 3.895683  | 0.174466  | 1.278480  |
| H | 0.954732  | -0.924338 | -1.701479 |
| H | 2.052487  | -3.099160 | -1.961251 |
| N | -1.542656 | -0.753396 | 1.091411  |
| C | -0.823493 | -0.294560 | 2.273568  |
| C | -1.898371 | 0.387954  | 0.190293  |
| O | -2.537194 | 1.401238  | 0.732837  |
| N | -2.495916 | -0.210680 | -1.048671 |
| C | -2.782945 | 0.807522  | -2.053024 |
| C | -3.706338 | -0.991517 | -0.758188 |
| C | -3.396058 | -2.114209 | 0.229245  |
| C | -2.716711 | -1.547260 | 1.474247  |
| H | 0.055177  | 0.282066  | 1.970622  |
| H | -0.480602 | -1.162209 | 2.850351  |
| H | -1.437229 | 0.339506  | 2.938112  |
| H | -1.885184 | 1.397974  | -2.255924 |
| H | -3.584172 | 1.505124  | -1.750507 |
| H | -3.090089 | 0.320321  | -2.986595 |
| H | -4.086991 | -1.406194 | -1.701069 |
| H | -4.507128 | -0.346170 | -0.344638 |
| H | -2.731380 | -2.846704 | -0.246559 |
| H | -4.320941 | -2.634376 | 0.507996  |
| H | -2.387007 | -2.360625 | 2.134082  |
| H | -3.441662 | -0.938641 | 2.051369  |

### 1e (A, DMPU)

$\Delta G = -442.862089$  hartree

|   |           |           |           |
|---|-----------|-----------|-----------|
| N | -0.869929 | 0.050094  | -0.006362 |
| C | -1.686927 | -1.178744 | 0.023249  |
| C | -3.104053 | -0.665817 | 0.325423  |
| C | -3.105373 | 0.769054  | -0.242603 |
| C | -1.672582 | 1.182647  | -0.078459 |
| C | 3.353437  | -0.016276 | 0.005419  |
| C | 2.620095  | -1.203691 | -0.110574 |
| C | 1.225664  | -1.191437 | -0.113517 |
| C | 0.516888  | 0.028775  | 0.001677  |
| C | 1.264121  | 1.226607  | 0.125749  |
| C | 2.657757  | 1.193193  | 0.124078  |
| H | -1.315844 | -1.870566 | 0.784675  |
| H | -1.634462 | -1.682816 | -0.951698 |
| H | -3.263374 | -0.638371 | 1.408377  |
| H | -3.872141 | -1.305894 | -0.115174 |
| H | -3.806485 | 1.429249  | 0.279230  |
| H | -3.405410 | 0.763548  | -1.304743 |
| H | -1.252955 | 2.101397  | -0.469261 |
| H | 4.438792  | -0.033222 | 0.005597  |
| H | 3.136729  | -2.155045 | -0.205429 |
| H | 0.689871  | -2.127656 | -0.218722 |

|   |          |          |          |
|---|----------|----------|----------|
| H | 0.755498 | 2.176123 | 0.244064 |
| H | 3.205112 | 2.126727 | 0.224967 |

### 1e (B, DMPU)

$\Delta G = -442.738774$  hartree

|   |           |           |           |
|---|-----------|-----------|-----------|
| N | 0.887108  | -0.034195 | -0.044564 |
| C | 1.712032  | 0.997071  | 0.667834  |
| C | 3.147944  | 0.669141  | 0.221769  |
| C | 3.065536  | -0.774373 | -0.333036 |
| C | 1.613529  | -0.966096 | -0.567183 |
| C | -3.330002 | 0.011355  | 0.000856  |
| C | -2.622452 | 1.168965  | -0.338974 |
| C | -1.227043 | 1.165050  | -0.348981 |
| C | -0.552622 | -0.015298 | -0.021751 |
| C | -1.245819 | -1.178087 | 0.329457  |
| C | -2.641467 | -1.158435 | 0.334945  |
| H | 1.535570  | 0.859634  | 1.738088  |
| H | 1.374111  | 1.991766  | 0.379365  |
| H | 3.851636  | 0.754752  | 1.049891  |
| H | 3.462469  | 1.355025  | -0.567655 |
| H | 3.398945  | -1.536694 | 0.385502  |
| H | 3.639443  | -0.938603 | -1.249536 |
| H | 1.153279  | -1.791404 | -1.100610 |
| H | -4.415153 | 0.023013  | 0.010380  |
| H | -3.154284 | 2.077422  | -0.601719 |
| H | -0.680645 | 2.058208  | -0.630311 |
| H | -0.706604 | -2.074589 | 0.617168  |
| H | -3.186332 | -2.054931 | 0.611775  |

### 1e (TS2, DMPU)

$\Delta G = -1637.478107$  hartree

|   |           |           |           |
|---|-----------|-----------|-----------|
| N | -0.965335 | 1.084463  | -0.291839 |
| C | -1.370216 | 2.494578  | -0.032551 |
| C | -0.044551 | 3.268324  | -0.109272 |
| C | 0.860459  | 2.355789  | -0.955819 |
| C | 0.315715  | 0.990121  | -0.651922 |
| S | 1.626959  | 0.317045  | 1.335157  |
| S | 3.280512  | -0.489592 | 0.418418  |
| S | 2.806438  | -1.988566 | -0.845800 |
| C | -3.661903 | -2.135152 | 0.180514  |
| C | -4.117190 | -0.815374 | 0.231431  |
| C | -3.226952 | 0.249389  | 0.081011  |
| C | -1.861170 | -0.003139 | -0.127399 |
| C | -1.398425 | -1.329975 | -0.174237 |
| C | -2.300382 | -2.382643 | -0.021446 |
| H | 0.666804  | 0.090128  | -1.141199 |
| H | -1.860362 | 2.568711  | 0.940534  |
| H | -2.078102 | 2.800602  | -0.809669 |
| H | 0.380128  | 3.386611  | 0.891393  |
| H | -0.177379 | 4.259202  | -0.546341 |
| H | 1.925134  | 2.452561  | -0.743723 |
| H | 0.715236  | 2.531357  | -2.032075 |
| H | -4.357141 | -2.960177 | 0.299010  |
| H | -5.170767 | -0.605396 | 0.387460  |

|   |           |           |           |
|---|-----------|-----------|-----------|
| H | -3.604307 | 1.263911  | 0.116794  |
| H | -0.346300 | -1.549674 | -0.309863 |
| H | -1.930427 | -3.402772 | -0.055702 |

### 1e (C, DMPU)

$\Delta G = -1637.480874$  hartree

|   |           |           |           |
|---|-----------|-----------|-----------|
| N | -0.940191 | 1.034244  | -0.194561 |
| C | -1.298779 | 2.456587  | -0.020043 |
| C | 0.043958  | 3.193653  | -0.140107 |
| C | 0.908016  | 2.230228  | -0.967775 |
| C | 0.423550  | 0.857982  | -0.508916 |
| S | 1.376099  | 0.283224  | 1.128569  |
| S | 3.251834  | -0.300169 | 0.394917  |
| S | 3.138475  | -2.043046 | -0.582747 |
| C | -3.796853 | -2.068175 | 0.074803  |
| C | -4.175885 | -0.730954 | 0.226969  |
| C | -3.234016 | 0.295311  | 0.145833  |
| C | -1.874104 | 0.001775  | -0.095758 |
| C | -1.494694 | -1.351277 | -0.242234 |
| C | -2.450085 | -2.364066 | -0.159540 |
| H | 0.614045  | 0.040317  | -1.204966 |
| H | -1.785125 | 2.621893  | 0.946698  |
| H | -1.999297 | 2.755220  | -0.810554 |
| H | 0.485810  | 3.340598  | 0.850177  |
| H | -0.068003 | 4.173056  | -0.609870 |
| H | 1.982217  | 2.370210  | -0.834165 |
| H | 0.682864  | 2.325412  | -2.037492 |
| H | -4.533841 | -2.862409 | 0.139516  |
| H | -5.215893 | -0.476402 | 0.410511  |
| H | -3.560572 | 1.321349  | 0.264399  |
| H | -0.458545 | -1.619338 | -0.407930 |
| H | -2.131514 | -3.396148 | -0.275603 |

### 1e (TS3, DMPU)

$\Delta G = -1637.439202$  hartree

|   |           |           |           |
|---|-----------|-----------|-----------|
| N | -0.572983 | 1.085269  | -0.134929 |
| C | -0.768784 | 2.491062  | -0.579742 |
| C | 0.556281  | 3.169705  | -0.227951 |
| C | 1.579764  | 2.028497  | -0.346086 |
| C | 0.774578  | 0.784745  | 0.024064  |
| S | 1.219827  | -0.192778 | 1.484820  |
| S | 2.958296  | -1.121819 | 0.600171  |
| S | 2.179828  | -1.476649 | -1.334957 |
| C | -3.847675 | -1.593052 | 0.049058  |
| C | -4.027887 | -0.230588 | 0.302950  |
| C | -2.948799 | 0.652419  | 0.247386  |
| C | -1.660233 | 0.181213  | -0.069122 |
| C | -1.482803 | -1.191089 | -0.328697 |
| C | -2.568964 | -2.063032 | -0.267744 |
| H | 1.294861  | -0.281040 | -1.020930 |
| H | -1.618398 | 2.940350  | -0.066258 |
| H | -0.974619 | 2.495889  | -1.657598 |
| H | 0.521334  | 3.542998  | 0.800487  |
| H | 0.774292  | 4.009185  | -0.891636 |

|   |           |           |           |
|---|-----------|-----------|-----------|
| H | 2.453526  | 2.153502  | 0.295400  |
| H | 1.937562  | 1.937532  | -1.379636 |
| H | -4.689763 | -2.276588 | 0.092852  |
| H | -5.012112 | 0.153744  | 0.553009  |
| H | -3.117857 | 1.699712  | 0.464775  |
| H | -0.506266 | -1.574870 | -0.592542 |
| H | -2.411752 | -3.116646 | -0.478664 |

### 1e (2e, DMPU)

$\Delta G = -840.527112$  hartree

|   |           |           |           |
|---|-----------|-----------|-----------|
| N | 0.660399  | -0.450727 | 0.029260  |
| C | 1.249901  | -1.798003 | 0.228032  |
| C | 2.728894  | -1.580765 | -0.123184 |
| C | 2.943718  | -0.080160 | 0.145347  |
| C | 1.565756  | 0.537337  | -0.012116 |
| S | 1.251300  | 2.182656  | -0.172294 |
| C | -3.542198 | -0.025845 | -0.000724 |
| C | -2.855260 | -0.276980 | -1.192804 |
| C | -1.463673 | -0.406909 | -1.187089 |
| C | -0.765463 | -0.279017 | 0.016920  |
| C | -1.444954 | -0.032043 | 1.213616  |
| C | -2.836349 | 0.095610  | 1.200870  |
| H | 0.743283  | -2.518664 | -0.417838 |
| H | 1.101782  | -2.102538 | 1.271294  |
| H | 2.895449  | -1.800982 | -1.181892 |
| H | 3.388862  | -2.219773 | 0.466675  |
| H | 3.666387  | 0.393917  | -0.520976 |
| H | 3.275643  | 0.107946  | 1.174498  |
| H | -4.623417 | 0.073554  | -0.007647 |
| H | -3.399935 | -0.372133 | -2.127187 |
| H | -0.920048 | -0.600879 | -2.106471 |
| H | -0.887296 | 0.063270  | 2.139924  |
| H | -3.366531 | 0.289526  | 2.128305  |

### 1e (1e, DMF)

$\Delta G = -443.505307$  hartree

|   |           |           |           |
|---|-----------|-----------|-----------|
| N | -0.846490 | 0.000003  | -0.000053 |
| C | -1.659978 | 1.218742  | -0.012979 |
| C | -3.078213 | 0.705985  | -0.304051 |
| C | -3.078203 | -0.705989 | 0.304077  |
| C | -1.659967 | -1.218744 | 0.012992  |
| C | 3.375045  | -0.000002 | 0.000017  |
| C | 2.658201  | 1.199165  | 0.086107  |
| C | 1.263398  | 1.210302  | 0.088312  |
| C | 0.527279  | 0.000005  | -0.000024 |
| C | 1.263395  | -1.210296 | -0.088333 |
| C | 2.658197  | -1.199167 | -0.086091 |
| H | -1.308505 | 1.918863  | -0.780487 |
| H | -1.610994 | 1.738459  | 0.957017  |
| H | -3.238504 | 0.650379  | -1.386880 |
| H | -3.848369 | 1.357152  | 0.118072  |
| H | -3.848360 | -1.357163 | -0.118035 |
| H | -3.238485 | -0.650382 | 1.386908  |
| H | -1.611001 | -1.738531 | -0.956966 |



|   |           |           |           |
|---|-----------|-----------|-----------|
| H | -1.308460 | -1.918805 | 0.780541  |
| H | 4.460610  | -0.000005 | 0.000032  |
| H | 3.189349  | 2.145087  | 0.157114  |
| H | 0.741947  | 2.157446  | 0.167239  |
| H | 0.741939  | -2.157438 | -0.167271 |
| H | 3.189342  | -2.145091 | -0.157080 |

### 1e (TS1, DMF)

$\Delta G = -691.945735$  hartree

|   |           |           |           |
|---|-----------|-----------|-----------|
| N | -3.125707 | -1.391916 | 0.233621  |
| C | -2.912927 | -1.975215 | -1.083710 |
| C | -4.147335 | -0.354247 | 0.201056  |
| C | -1.858223 | -0.960686 | 0.881841  |
| O | -1.966689 | -0.421803 | 2.083484  |
| H | -2.140439 | -2.750239 | -1.026336 |
| H | -2.595659 | -1.234329 | -1.842530 |
| H | -3.837777 | -2.442454 | -1.441780 |
| H | -3.904415 | 0.464579  | -0.505254 |
| H | -4.250841 | 0.076613  | 1.198719  |
| H | -5.108664 | -0.785249 | -0.102859 |
| H | -1.176015 | -1.844044 | 0.799674  |
| N | 0.811223  | 1.102951  | -0.231112 |
| C | 0.973298  | 2.462702  | 0.300674  |
| C | -0.128921 | 3.257635  | -0.412185 |
| C | -1.238794 | 2.208631  | -0.632972 |
| C | -0.497203 | 0.888886  | -0.795644 |
| C | 3.815435  | -1.857999 | 0.023784  |
| C | 3.995971  | -0.602062 | 0.619131  |
| C | 3.008752  | 0.380515  | 0.553488  |
| C | 1.783231  | 0.139015  | -0.126320 |
| C | 1.606125  | -1.143045 | -0.717709 |
| C | 2.606419  | -2.109971 | -0.639222 |
| H | 1.972994  | 2.849696  | 0.075443  |
| H | 0.846901  | 2.480372  | 1.394370  |
| H | 0.246989  | 3.621024  | -1.375713 |
| H | -0.456825 | 4.123567  | 0.171545  |
| H | -1.873132 | 2.439865  | -1.494484 |
| H | -1.894191 | 2.174142  | 0.249400  |
| H | -0.467199 | 0.470905  | -1.809197 |
| H | -1.263777 | -0.134234 | 0.045882  |
| H | 4.588342  | -2.618254 | 0.081551  |
| H | 4.918657  | -0.381043 | 1.150515  |
| H | 3.182597  | 1.333288  | 1.040435  |
| H | 0.677381  | -1.373146 | -1.225335 |
| H | 2.435006  | -3.078830 | -1.102769 |

### 1e (A, DMF)

$\Delta G = -442.868708$  hartree

|   |           |           |           |
|---|-----------|-----------|-----------|
| N | -0.869929 | 0.050094  | -0.006362 |
| C | -1.686927 | -1.178744 | 0.023249  |
| C | -3.104053 | -0.665817 | 0.325423  |
| C | -3.105373 | 0.769054  | -0.242603 |
| C | -1.672582 | 1.182647  | -0.078459 |
| C | 3.353437  | -0.016276 | 0.005419  |

|   |           |           |           |
|---|-----------|-----------|-----------|
| C | 2.620095  | -1.203691 | -0.110574 |
| C | 1.225664  | -1.191437 | -0.113517 |
| C | 0.516888  | 0.028775  | 0.001677  |
| C | 1.264121  | 1.226607  | 0.125749  |
| C | 2.657757  | 1.193193  | 0.124078  |
| H | -1.315844 | -1.870566 | 0.784675  |
| H | -1.634462 | -1.682816 | -0.951698 |
| H | -3.263374 | -0.638371 | 1.408377  |
| H | -3.872141 | -1.305894 | -0.115174 |
| H | -3.806485 | 1.429249  | 0.279230  |
| H | -3.405410 | 0.763548  | -1.304743 |
| H | -1.252955 | 2.101397  | -0.469261 |
| H | 4.438792  | -0.033222 | 0.005597  |
| H | 3.136729  | -2.155045 | -0.205429 |
| H | 0.689871  | -2.127656 | -0.218722 |
| H | 0.755498  | 2.176123  | 0.244064  |
| H | 3.205112  | 2.126727  | 0.224967  |

### 1e (B, DMF)

$\Delta G = -442.742188$  hartree

|   |           |           |           |
|---|-----------|-----------|-----------|
| N | 0.887108  | -0.034195 | -0.044564 |
| C | 1.712032  | 0.997071  | 0.667834  |
| C | 3.147944  | 0.669141  | 0.221769  |
| C | 3.065536  | -0.774373 | -0.333036 |
| C | 1.613529  | -0.966096 | -0.567183 |
| C | -3.330002 | 0.011355  | 0.000856  |
| C | -2.622452 | 1.168965  | -0.338974 |
| C | -1.227043 | 1.165050  | -0.348981 |
| C | -0.552622 | -0.015298 | -0.021751 |
| C | -1.245819 | -1.178087 | 0.329457  |
| C | -2.641467 | -1.158435 | 0.334945  |
| H | 1.535570  | 0.859634  | 1.738088  |
| H | 1.374111  | 1.991766  | 0.379365  |
| H | 3.851636  | 0.754752  | 1.049891  |
| H | 3.462469  | 1.355025  | -0.567655 |
| H | 3.398945  | -1.536694 | 0.385502  |
| H | 3.639443  | -0.938603 | -1.249536 |
| H | 1.153279  | -1.791404 | -1.100610 |
| H | -4.415153 | 0.023013  | 0.010380  |
| H | -3.154284 | 2.077422  | -0.601719 |
| H | -0.680645 | 2.058208  | -0.630311 |
| H | -0.706604 | -2.074589 | 0.617168  |
| H | -3.186332 | -2.054931 | 0.611775  |

### 1e (TS2, DMF)

$\Delta G = -1637.481493$  hartree

|   |           |           |           |
|---|-----------|-----------|-----------|
| N | -0.965436 | 1.084267  | -0.291610 |
| C | -1.370354 | 2.494374  | -0.032468 |
| C | -0.044765 | 3.268207  | -0.109530 |
| C | 0.860108  | 2.355643  | -0.956166 |
| C | 0.315809  | 0.989874  | -0.651589 |
| S | 1.626063  | 0.317572  | 1.334048  |
| S | 3.280530  | -0.488002 | 0.417931  |
| S | 2.808162  | -1.989813 | -0.843479 |

|   |           |           |           |
|---|-----------|-----------|-----------|
| C | -3.662136 | -2.135354 | 0.180009  |
| C | -4.117299 | -0.815549 | 0.231521  |
| C | -3.227017 | 0.249215  | 0.081375  |
| C | -1.861258 | -0.003281 | -0.127368 |
| C | -1.398657 | -1.330170 | -0.174777 |
| C | -2.300660 | -2.382845 | -0.022265 |
| H | 0.666482  | 0.090118  | -1.141613 |
| H | -1.860356 | 2.568684  | 0.940680  |
| H | -2.078365 | 2.800271  | -0.809523 |
| H | 0.380100  | 3.386665  | 0.891042  |
| H | -0.177753 | 4.259021  | -0.546695 |
| H | 1.924859  | 2.452806  | -0.744622 |
| H | 0.714290  | 2.530830  | -2.032395 |
| H | -4.357419 | -2.960374 | 0.298267  |
| H | -5.170836 | -0.605546 | 0.387791  |
| H | -3.604309 | 1.263741  | 0.117611  |
| H | -0.346582 | -1.549901 | -0.310700 |
| H | -1.930786 | -3.402989 | -0.057019 |

### 1e (C, DMF)

$\Delta G = -1637.484102$  hartree

|   |           |           |           |
|---|-----------|-----------|-----------|
| N | -0.940247 | 1.034190  | -0.194620 |
| C | -1.298765 | 2.456524  | -0.019897 |
| C | 0.044022  | 3.193527  | -0.139999 |
| C | 0.907855  | 2.230061  | -0.967885 |
| C | 0.423478  | 0.857892  | -0.508877 |
| S | 1.376257  | 0.283331  | 1.128649  |
| S | 3.251834  | -0.299874 | 0.394412  |
| S | 3.138607  | -2.043256 | -0.582399 |
| C | -3.796934 | -2.068131 | 0.074755  |
| C | -4.175984 | -0.730892 | 0.226795  |
| C | -3.234098 | 0.295360  | 0.145727  |
| C | -1.874167 | 0.001767  | -0.095716 |
| C | -1.494734 | -1.351280 | -0.242045 |
| C | -2.450146 | -2.364067 | -0.159417 |
| H | 0.613960  | 0.040052  | -1.204724 |
| H | -1.784962 | 2.621740  | 0.946940  |
| H | -1.999428 | 2.755264  | -0.810222 |
| H | 0.485972  | 3.340311  | 0.850254  |
| H | -0.067824 | 4.172958  | -0.609701 |
| H | 1.982092  | 2.370091  | -0.834629 |
| H | 0.682335  | 2.325236  | -2.037532 |
| H | -4.533928 | -2.862360 | 0.139418  |
| H | -5.216012 | -0.476335 | 0.410186  |
| H | -3.560620 | 1.321412  | 0.264201  |
| H | -0.458571 | -1.619321 | -0.407693 |
| H | -2.131604 | -3.396165 | -0.275386 |

### 1e (TS3, DMF)

$\Delta G = -1637.439300$  hartree

|   |           |          |           |
|---|-----------|----------|-----------|
| N | -0.572686 | 1.085389 | -0.135593 |
| C | -0.768212 | 2.490562 | -0.582367 |
| C | 0.555911  | 3.170018 | -0.228675 |
| C | 1.580091  | 2.029144 | -0.344503 |

|   |           |           |           |
|---|-----------|-----------|-----------|
| C | 0.774763  | 0.785091  | 0.024567  |
| S | 1.218523  | -0.192965 | 1.485183  |
| S | 2.957161  | -1.123416 | 0.601558  |
| S | 2.180768  | -1.475610 | -1.334857 |
| C | -3.847288 | -1.592881 | 0.048775  |
| C | -4.026846 | -0.230978 | 0.306227  |
| C | -2.947727 | 0.651990  | 0.250597  |
| C | -1.659962 | 0.181243  | -0.069657 |
| C | -1.483115 | -1.190435 | -0.332625 |
| C | -2.569288 | -2.062389 | -0.271566 |
| H | 1.295889  | -0.279919 | -1.020431 |
| H | -1.619241 | 2.939946  | -0.071346 |
| H | -0.971658 | 2.494003  | -1.660692 |
| H | 0.519041  | 3.543841  | 0.799503  |
| H | 0.774703  | 4.009208  | -0.892464 |
| H | 2.452534  | 2.154723  | 0.298676  |
| H | 1.939978  | 1.938036  | -1.377308 |
| H | -4.689403 | -2.276383 | 0.092607  |
| H | -5.010523 | 0.152846  | 0.559198  |
| H | -3.115964 | 1.698814  | 0.471003  |
| H | -0.507049 | -1.573616 | -0.599168 |
| H | -2.412697 | -3.115549 | -0.485196 |

### 1e (2e, DMF)

$\Delta G = -840.527162$  hartree

|   |           |           |           |
|---|-----------|-----------|-----------|
| N | 0.660399  | -0.450727 | 0.029260  |
| C | 1.249901  | -1.798003 | 0.228032  |
| C | 2.728894  | -1.580765 | -0.123184 |
| C | 2.943718  | -0.080160 | 0.145347  |
| C | 1.565756  | 0.537337  | -0.012116 |
| S | 1.251300  | 2.182656  | -0.172294 |
| C | -3.542198 | -0.025845 | -0.000724 |
| C | -2.855260 | -0.276980 | -1.192804 |
| C | -1.463673 | -0.406909 | -1.187089 |
| C | -0.765463 | -0.279017 | 0.016920  |
| C | -1.444954 | -0.032043 | 1.213616  |
| C | -2.836349 | 0.095610  | 1.200870  |
| H | 0.743283  | -2.518664 | -0.417838 |
| H | 1.101782  | -2.102538 | 1.271294  |
| H | 2.895449  | -1.800982 | -1.181892 |
| H | 3.388862  | -2.219773 | 0.466675  |
| H | 3.666387  | 0.393917  | -0.520976 |
| H | 3.275643  | 0.107946  | 1.174498  |
| H | -4.623417 | 0.073554  | -0.007647 |
| H | -3.399935 | -0.372133 | -2.127187 |
| H | -0.920048 | -0.600879 | -2.106471 |
| H | -0.887296 | 0.063270  | 2.139924  |
| H | -3.366531 | 0.289526  | 2.128305  |

### DMPU •-

$\Delta G = -420.523282$  hartree

|   |           |           |           |
|---|-----------|-----------|-----------|
| N | -1.194827 | -0.102196 | -0.471326 |
| C | -2.428466 | -0.858910 | -0.308922 |
| C | 0.000000  | -0.897435 | -0.148919 |

|   |           |           |           |
|---|-----------|-----------|-----------|
| O | -0.000001 | -1.645325 | 0.927130  |
| N | 1.194827  | -0.102198 | -0.471326 |
| C | 2.428465  | -0.858912 | -0.308920 |
| C | 1.255120  | 1.169611  | 0.272418  |
| C | 0.000001  | 1.997308  | -0.004758 |
| C | -1.255118 | 1.169611  | 0.272421  |
| H | -2.359483 | -1.796290 | -0.871253 |
| H | -3.269536 | -0.276074 | -0.704764 |
| H | -2.652833 | -1.113274 | 0.742402  |
| H | 2.359477  | -1.796298 | -0.871240 |
| H | 2.652839  | -1.113264 | 0.742405  |
| H | 3.269534  | -0.276082 | -0.704775 |
| H | 2.152516  | 1.720001  | -0.039692 |
| H | 1.349714  | 0.990431  | 1.363179  |
| H | -0.000001 | 2.315402  | -1.055430 |
| H | 0.000002  | 2.900735  | 0.617268  |
| H | -2.152516 | 1.720001  | -0.039684 |
| H | -1.349708 | 0.990428  | 1.363182  |

### DMPU\_H<sup>-</sup>

$\Delta G = -421.155930$  hartree

|   |           |           |           |
|---|-----------|-----------|-----------|
| N | -0.268203 | -0.189857 | 1.216022  |
| C | 0.347321  | -0.704128 | 2.435287  |
| O | 0.517227  | -2.071307 | 0.000000  |
| N | -0.268203 | -0.189857 | -1.216022 |
| C | 0.347321  | -0.704128 | -2.435287 |
| C | -0.268203 | 1.273902  | -1.246070 |
| C | -0.936563 | 1.845680  | 0.000000  |
| C | -0.268203 | 1.273902  | 1.246070  |
| H | 0.346011  | -1.793897 | 2.416928  |
| H | -0.217674 | -0.356308 | 3.307918  |
| H | 1.397683  | -0.363688 | 2.557127  |
| H | 0.346011  | -1.793897 | -2.416928 |
| H | 1.397683  | -0.363688 | -2.557127 |
| H | -0.217674 | -0.356308 | -3.307918 |
| H | -0.788310 | 1.607714  | -2.153019 |
| H | 0.769346  | 1.669059  | -1.313204 |
| H | -2.003654 | 1.592167  | 0.000000  |
| H | -0.855092 | 2.939752  | 0.000000  |
| H | -0.788310 | 1.607714  | 2.153019  |
| H | 0.769346  | 1.669059  | 1.313204  |
| C | 0.443421  | -0.748733 | 0.000000  |
| H | 1.471082  | -0.248203 | 0.000000  |

### DMPU\_H<sub>2</sub>

$\Delta G = -421.642128$  hartree

|   |           |           |           |
|---|-----------|-----------|-----------|
| N | -1.205763 | -0.062410 | -0.274020 |
| C | -2.417895 | -0.763689 | 0.158786  |
| N | 1.205763  | -0.062421 | -0.274020 |
| C | 2.417892  | -0.763703 | 0.158792  |
| C | 1.241980  | 1.340832  | 0.163285  |
| C | 0.000005  | 2.083670  | -0.312567 |
| C | -1.241971 | 1.340841  | 0.163293  |
| H | -2.427019 | -1.780523 | -0.234631 |

|   |           |           |           |
|---|-----------|-----------|-----------|
| H | -3.289688 | -0.232727 | -0.233080 |
| H | -2.510804 | -0.809774 | 1.260126  |
| H | 2.427000  | -1.780545 | -0.234601 |
| H | 2.510807  | -0.809763 | 1.260133  |
| H | 3.289687  | -0.232756 | -0.233091 |
| H | 2.151003  | 1.795226  | -0.243550 |
| H | 1.313224  | 1.408148  | 1.267513  |
| H | 0.000001  | 2.148132  | -1.406472 |
| H | 0.000011  | 3.104188  | 0.085899  |
| H | -2.150994 | 1.795241  | -0.243534 |
| H | -1.313207 | 1.408154  | 1.267522  |
| C | -0.000002 | -0.755554 | 0.173673  |
| H | -0.000004 | -0.855810 | 1.286524  |
| O | 0.000005  | -2.058151 | -0.389353 |
| H | -0.000119 | -2.712552 | 0.320766  |

### DMF •<sup>-</sup>

$\Delta G = -248.510913$  hartree

|   |           |           |           |
|---|-----------|-----------|-----------|
| N | -0.362581 | -0.017934 | -0.312967 |
| C | -0.480359 | 1.386172  | 0.057061  |
| C | -1.561349 | -0.763989 | 0.040095  |
| C | 0.859665  | -0.646780 | 0.163508  |
| O | 2.001557  | -0.044064 | -0.026778 |
| H | 0.427725  | 1.916803  | -0.232630 |
| H | -0.616792 | 1.512833  | 1.153043  |
| H | -1.338620 | 1.837505  | -0.452398 |
| H | -1.771158 | -0.736907 | 1.128934  |
| H | -1.447295 | -1.812790 | -0.253984 |
| H | -2.429553 | -0.353165 | -0.486026 |
| H | 0.793554  | -1.738648 | -0.015928 |

### DMF\_H<sup>-</sup>

$\Delta G = -249.133982$  hartree

|   |           |           |           |
|---|-----------|-----------|-----------|
| N | -0.389458 | 0.006588  | -0.369713 |
| C | -0.549167 | 1.381577  | 0.086903  |
| C | -1.560837 | -0.785110 | -0.015786 |
| O | 2.012505  | 0.008780  | -0.142903 |
| H | 0.347418  | 1.951308  | -0.165029 |
| H | -0.698364 | 1.444903  | 1.186569  |
| H | -1.415383 | 1.847179  | -0.397453 |
| H | -1.732483 | -0.833225 | 1.080349  |
| H | -1.444995 | -1.811454 | -0.381698 |
| H | -2.460973 | -0.358238 | -0.472228 |
| C | 0.865373  | -0.605986 | 0.207325  |
| H | 0.798033  | -1.673978 | -0.118880 |
| H | 0.700694  | -0.625733 | 1.328930  |

### DMF\_H<sub>2</sub>

$\Delta G = -249.625339$  hartree

|   |           |           |           |
|---|-----------|-----------|-----------|
| N | -0.416395 | -0.000378 | -0.304225 |
| C | -0.605554 | 1.395687  | 0.092013  |
| C | -1.616341 | -0.799582 | -0.058667 |
| H | 0.300519  | 1.964845  | -0.125235 |

|   |           |           |           |
|---|-----------|-----------|-----------|
| H | -0.835637 | 1.497885  | 1.169480  |
| H | -1.432185 | 1.829229  | -0.478262 |
| H | -1.893378 | -0.844116 | 1.011116  |
| H | -1.464843 | -1.821869 | -0.417954 |
| H | -2.458224 | -0.364878 | -0.605105 |
| O | 1.922025  | -0.026635 | -0.294539 |
| H | 2.620436  | 0.022281  | 0.371573  |
| C | 0.753586  | -0.591697 | 0.306158  |
| H | 0.722334  | -1.672729 | 0.123571  |
| H | 0.789395  | -0.421370 | 1.399679  |

### DMA •<sup>-</sup>

$\Delta G = -287.804456$  hartree

|   |           |           |           |
|---|-----------|-----------|-----------|
| N | 0.608883  | 0.084588  | -0.292067 |
| C | 1.596305  | -0.953120 | -0.007718 |
| C | 1.126119  | 1.396253  | 0.088968  |
| C | -0.725006 | -0.242853 | 0.202090  |
| O | -1.119566 | -1.476235 | 0.033223  |
| H | 1.213474  | -1.921316 | -0.328058 |
| H | 1.827657  | -1.017207 | 1.076681  |
| H | 2.526019  | -0.734091 | -0.543099 |
| H | 1.218898  | 1.507009  | 1.189551  |
| H | 0.483633  | 2.197430  | -0.280219 |
| H | 2.119110  | 1.536412  | -0.350142 |
| C | -1.757069 | 0.849163  | -0.049805 |
| H | -1.508365 | 1.823023  | 0.381781  |
| H | -1.915261 | 0.999984  | -1.142667 |
| H | -2.712908 | 0.529865  | 0.373649  |

### DMA\_H<sup>-</sup>

$\Delta G = -288.426681$  hartree

|   |           |           |           |
|---|-----------|-----------|-----------|
| N | 0.630704  | 0.078939  | -0.348374 |
| C | 1.571586  | -0.993688 | -0.034829 |
| C | 1.200052  | 1.354910  | 0.079853  |
| O | -1.181816 | -1.444019 | -0.029539 |
| H | 1.147333  | -1.949226 | -0.342807 |
| H | 1.797236  | -1.053459 | 1.052004  |
| H | 2.517689  | -0.827271 | -0.563046 |
| H | 1.286857  | 1.434262  | 1.184477  |
| H | 0.598559  | 2.196198  | -0.271506 |
| H | 2.206887  | 1.469503  | -0.337253 |
| C | -0.723654 | -0.213003 | 0.281622  |
| H | -0.544876 | -0.092951 | 1.396213  |
| C | -1.717000 | 0.905696  | -0.121336 |
| H | -1.447076 | 1.905182  | 0.241260  |
| H | -1.812848 | 0.941477  | -1.214536 |
| H | -2.696068 | 0.652379  | 0.298270  |

### DMA\_H<sub>2</sub>

$\Delta G = -288.918299$  hartree

|   |          |           |           |
|---|----------|-----------|-----------|
| N | 0.655697 | 0.017634  | -0.310802 |
| C | 1.534429 | -1.082793 | 0.101706  |
| C | 1.301611 | 1.306160  | -0.048204 |

|   |           |           |           |
|---|-----------|-----------|-----------|
| H | 1.065809  | -2.039602 | -0.129673 |
| H | 1.759592  | -1.054280 | 1.184771  |
| H | 2.479015  | -1.014691 | -0.445271 |
| H | 1.430739  | 1.510403  | 1.031356  |
| H | 0.736608  | 2.127205  | -0.492114 |
| H | 2.293667  | 1.297795  | -0.507551 |
| O | -1.238085 | -1.303306 | -0.265694 |
| H | -1.933896 | -1.610771 | 0.331379  |
| C | -0.666729 | -0.106219 | 0.290179  |
| H | -0.580074 | -0.245715 | 1.387626  |
| C | -1.580476 | 1.084847  | 0.008860  |
| H | -1.264502 | 1.983594  | 0.545420  |
| H | -1.612808 | 1.297979  | -1.064630 |
| H | -2.592359 | 0.839125  | 0.344606  |

### Acetone •<sup>-</sup>

$\Delta G = -193.181295$  hartree

|   |           |           |           |
|---|-----------|-----------|-----------|
| C | 1.273429  | -0.624623 | 0.025787  |
| C | 0.000000  | 0.157086  | -0.251186 |
| O | 0.000001  | 1.440061  | 0.061381  |
| C | -1.273430 | -0.624622 | 0.025788  |
| H | -1.414143 | -0.782924 | 1.121346  |
| H | -1.271338 | -1.618833 | -0.440121 |
| H | -2.158285 | -0.082011 | -0.327918 |
| H | 1.414151  | -0.782900 | 1.121348  |
| H | 2.158289  | -0.082029 | -0.327936 |
| H | 1.271325  | -1.618843 | -0.440102 |

### Acetone\_H<sup>-</sup>

$\Delta G = -193.804116$  hartree

|   |           |           |           |
|---|-----------|-----------|-----------|
| C | 1.259543  | -0.639840 | -0.087553 |
| C | 0.000000  | 0.159455  | 0.333812  |
| O | -0.000001 | 1.447064  | -0.149911 |
| C | -1.259543 | -0.639840 | -0.087553 |
| H | 0.000000  | 0.138213  | 1.457914  |
| H | -1.283407 | -1.650042 | 0.347911  |
| H | -1.291543 | -0.736336 | -1.182180 |
| H | -2.166718 | -0.110311 | 0.228839  |
| H | 1.283408  | -1.650042 | 0.347910  |
| H | 2.166718  | -0.110310 | 0.228840  |
| H | 1.291544  | -0.736334 | -1.182180 |

### Acetone\_H<sub>2</sub>

$\Delta G = -194.305930$  hartree

|   |           |           |           |
|---|-----------|-----------|-----------|
| C | 1.183955  | -0.807332 | -0.103166 |
| C | -0.002124 | 0.036360  | 0.362636  |
| O | 0.078025  | 1.378042  | -0.166826 |
| C | -1.342482 | -0.529087 | -0.088700 |
| H | 0.009155  | 0.094351  | 1.461408  |
| H | 0.916305  | 1.770178  | 0.114745  |
| H | -1.488741 | -1.534414 | 0.318807  |
| H | -1.384668 | -0.590103 | -1.182100 |
| H | -2.165646 | 0.104812  | 0.255464  |

|   |          |           |           |
|---|----------|-----------|-----------|
| H | 1.125487 | -1.817663 | 0.316516  |
| H | 2.133425 | -0.365919 | 0.221287  |
| H | 1.194384 | -0.885222 | -1.196143 |

### CH<sub>3</sub>CN •<sup>-</sup>

$\Delta G = -132.804567$  hartree

|   |           |           |           |
|---|-----------|-----------|-----------|
| C | 1.139243  | 0.091597  | 0.000000  |
| C | -0.305447 | -0.425321 | 0.000000  |
| N | -1.361741 | 0.196206  | 0.000000  |
| H | 1.182256  | 1.196421  | -0.000003 |
| H | 1.673579  | -0.283762 | -0.880759 |
| H | 1.673575  | -0.283757 | 0.880764  |

### CH<sub>3</sub>CN\_H •<sup>-</sup>

$\Delta G = -133.414304$  hartree

|   |           |           |           |
|---|-----------|-----------|-----------|
| C | -1.155468 | -0.147637 | -0.000001 |
| C | 0.291444  | 0.375834  | 0.000002  |
| N | 1.355878  | -0.296012 | -0.000001 |
| H | 0.270724  | 1.513178  | -0.000003 |
| H | -1.702957 | 0.216827  | 0.882753  |
| H | -1.171785 | -1.243998 | -0.000039 |
| H | -1.702981 | 0.216893  | -0.882713 |

### CH<sub>3</sub>CN\_H<sub>2</sub>

$\Delta G = -133.922204$  hartree

|   |           |           |           |
|---|-----------|-----------|-----------|
| C | -1.183124 | -0.165994 | -0.000057 |
| C | 0.188795  | 0.444749  | -0.000073 |
| N | 1.314605  | -0.160275 | 0.000050  |
| H | 0.218933  | 1.539852  | -0.000068 |
| H | 1.172851  | -1.176591 | -0.000179 |
| H | -1.741449 | 0.169418  | 0.882277  |
| H | -1.141688 | -1.259253 | -0.004010 |
| H | -1.744911 | 0.175974  | -0.877588 |

### S<sub>3</sub> •<sup>-</sup> (DMPU)

$\Delta G = -1194.753853$  hartree

|   |           |           |          |
|---|-----------|-----------|----------|
| S | 1.712620  | -0.367441 | 0.000000 |
| S | 0.000000  | 0.734404  | 0.000000 |
| S | -1.712620 | -0.366963 | 0.000000 |

### S<sub>3</sub> •<sup>-</sup> (DMF)

$\Delta G = -1194.754001$  hartree

|   |           |           |          |
|---|-----------|-----------|----------|
| S | 1.712560  | -0.367470 | 0.000000 |
| S | 0.000000  | 0.734463  | 0.000000 |
| S | -1.712560 | -0.366993 | 0.000000 |

### S<sub>3</sub> •<sup>-</sup> (DMA)

$\Delta G = -1194.754035$  hartree

|   |          |           |          |
|---|----------|-----------|----------|
| S | 1.712546 | -0.367477 | 0.000000 |
| S | 0.000000 | 0.734477  | 0.000000 |

|   |           |           |          |
|---|-----------|-----------|----------|
| S | -1.712546 | -0.367000 | 0.000000 |
|---|-----------|-----------|----------|

### S<sub>3</sub> •<sup>-</sup> (Acetone)

$\Delta G = -1194.752102$  hartree

|   |           |           |          |
|---|-----------|-----------|----------|
| S | 1.713298  | -0.367104 | 0.000000 |
| S | 0.000000  | 0.733729  | 0.000000 |
| S | -1.713298 | -0.366625 | 0.000000 |

### S<sub>3</sub> •<sup>-</sup> (CH<sub>3</sub>CN)

$\Delta G = -1194.753901$  hartree

|   |           |           |          |
|---|-----------|-----------|----------|
| S | 1.712600  | -0.367450 | 0.000000 |
| S | 0.000000  | 0.734423  | 0.000000 |
| S | -1.712600 | -0.366973 | 0.000000 |

### HS<sub>2</sub> • (DMPU)

$\Delta G = -796.979074$  hartree

|   |           |           |          |
|---|-----------|-----------|----------|
| S | 0.040243  | -0.966128 | 0.000000 |
| S | 0.040243  | 1.044086  | 0.000000 |
| H | -1.287774 | -1.247328 | 0.000000 |

### HS<sub>2</sub> • (DMF)

$\Delta G = -796.979085$  hartree

|   |           |           |          |
|---|-----------|-----------|----------|
| S | 0.040243  | -0.966127 | 0.000000 |
| S | 0.040243  | 1.044085  | 0.000000 |
| H | -1.287768 | -1.247319 | 0.000000 |

### HS<sub>2</sub> • (DMA)

$\Delta G = -796.979087$  hartree

|   |           |           |          |
|---|-----------|-----------|----------|
| S | 0.040243  | -0.966127 | 0.000000 |
| S | 0.040243  | 1.044085  | 0.000000 |
| H | -1.287767 | -1.247317 | 0.000000 |

### HS<sub>2</sub> • (Acetone)

$\Delta G = -796.978955$  hartree

|   |           |           |          |
|---|-----------|-----------|----------|
| S | 0.040245  | -0.966132 | 0.000000 |
| S | 0.040245  | 1.044097  | 0.000000 |
| H | -1.287844 | -1.247442 | 0.000000 |

### HS<sub>2</sub> • (CH<sub>3</sub>CN)

$\Delta G = -796.979078$  hartree

|   |           |           |          |
|---|-----------|-----------|----------|
| S | 0.040243  | -0.966128 | 0.000000 |
| S | 0.040243  | 1.044086  | 0.000000 |
| H | -1.287772 | -1.247325 | 0.000000 |

### S<sub>2</sub> •<sup>-</sup> (DMPU)

$\Delta G = -796.540689$  hartree

|   |          |          |           |
|---|----------|----------|-----------|
| S | 0.000000 | 0.000000 | 1.022522  |
| S | 0.000000 | 0.000000 | -1.022522 |

**S<sub>2</sub> •<sup>-</sup> (DMF)****ΔG = -796.540851 hartree**

|   |          |          |           |
|---|----------|----------|-----------|
| S | 0.000000 | 0.000000 | 1.022523  |
| S | 0.000000 | 0.000000 | -1.022523 |

**S<sub>2</sub> •<sup>-</sup> (DMA)****ΔG = -796.540889 hartree**

|   |          |          |           |
|---|----------|----------|-----------|
| S | 0.000000 | 0.000000 | 1.022524  |
| S | 0.000000 | 0.000000 | -1.022524 |

**S<sub>2</sub> •<sup>-</sup> (Acetone)****ΔG = -796.538768 hartree**

|   |          |          |           |
|---|----------|----------|-----------|
| S | 0.000000 | 0.000000 | 1.022507  |
| S | 0.000000 | 0.000000 | -1.022507 |

**S<sub>2</sub> •<sup>-</sup> (CH<sub>3</sub>CN)****ΔG = -796.540741 hartree**

|   |          |          |           |
|---|----------|----------|-----------|
| S | 0.000000 | 0.000000 | 1.022522  |
| S | 0.000000 | 0.000000 | -1.022522 |

**S<sub>2</sub> <sup>2-</sup> (DMPU)****ΔG = -796.659387 hartree**

|   |          |          |           |
|---|----------|----------|-----------|
| S | 0.000000 | 0.000000 | 1.103023  |
| S | 0.000000 | 0.000000 | -1.103023 |

**S<sub>2</sub> <sup>2-</sup> (DMF)****ΔG = -796.660017 hartree**

|   |          |          |           |
|---|----------|----------|-----------|
| S | 0.000000 | 0.000000 | 1.103040  |
| S | 0.000000 | 0.000000 | -1.103040 |

**S<sub>2</sub> <sup>2-</sup> (DMA)****ΔG = -796.660165 hartree**

|   |          |          |           |
|---|----------|----------|-----------|
| S | 0.000000 | 0.000000 | 1.103045  |
| S | 0.000000 | 0.000000 | -1.103045 |

**S<sub>2</sub> <sup>2-</sup> (Acetone)****ΔG = -796.651913 hartree**

|   |          |          |           |
|---|----------|----------|-----------|
| S | 0.000000 | 0.000000 | 1.102835  |
| S | 0.000000 | 0.000000 | -1.102835 |

**S<sub>2</sub> <sup>2-</sup> (CH<sub>3</sub>CN)****ΔG = -796.659590 hartree**

|   |          |          |           |
|---|----------|----------|-----------|
| S | 0.000000 | 0.000000 | 1.103029  |
| S | 0.000000 | 0.000000 | -1.103029 |
